# Supplementary material for: Direct amide synthesis via Ni-mediated aminocarbonylation of arylboronic acids with CO and nitroarenes
Source: Royal Society of Chemistry journal article supplement (doi:10.1039/c9cc06638a), 2019-01-01

# Electronic Supplementary Information

## Direct Amide Synthesis via Ni-mediated Aminocarbonylation of Arylboronic Acids with CO and Nitroarenes

Ni Shen, Chi Wai Cheung,<sup>\*</sup> and Jun-An Ma<sup>\*</sup>

*Department of Chemistry, Tianjin Key Laboratory of Molecular Optoelectronic Sciences, and Tianjin Collaborative Innovation Center of Chemical Science & Engineering, Tianjin University, Tianjin 300072, People's Republic of China; and Joint School of NUS & TJU, International Campus of Tianjin University, Fuzhou 350207, People's Republic of China*

\*E-mail: zhiwei.zhang@tju.edu.cn

\*E-mail: majun\_an68@tju.edu.cn

| Content                                                                                        | Page No. |
|------------------------------------------------------------------------------------------------|----------|
| <b>Scheme S1.</b> Possible conversion of iodide to iodine and iodoarene for aminocarbonylation | S2       |
| <b>Scheme S2.</b> Proposed mechanism of aminocarbonylation.                                    | S3       |
| General Considerations                                                                         | S5       |
| Experimental Section                                                                           | S7       |
| References                                                                                     | S25      |
| NMR Spectra                                                                                    | S27      |

**Scheme S1.** Possible conversion of iodide to iodine and iodoarene for aminocarbonylation.

**(i) Possible Mechanism via the formation of iodoarene**

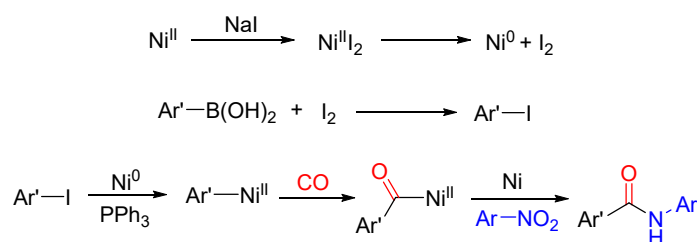

**(ii) Aminocarbonylation using I<sub>2</sub> instead of KI**

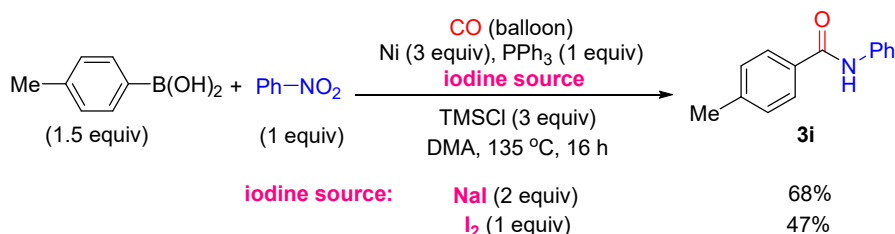

**(iii) Aminocarbonylation with iodoarene**

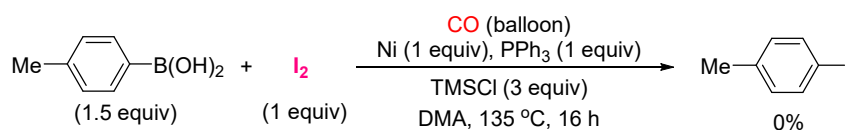

The addition of NaI was found to promote the efficiency of aminocarbonylation and significantly enhance the yield of amide (Table 1, entries 7 and 8). A possible role of NaI is to generate I<sub>2</sub>, which can also induce the formation of iodoarene, such that both I<sub>2</sub> and iodoarene may promote the aminocarbonylation [Scheme S1, (i)]. Iodide could coordinate to Ni(II) species to form Ni<sup>II</sup>I<sub>2</sub>, which can liberate I<sub>2</sub> under high temperature. Arylboronic acid then reacts with I<sub>2</sub> to form iodoarene, which further reacts with Ni metal and nitroarene to give amide. However, when I<sub>2</sub> was used instead of KI, the reaction was less efficient, giving the amide product in much less yield [Scheme S1, (ii)]. Moreover, no iodoarene was formed in the Ni<sup>II</sup>Cl<sub>2</sub>-mediated reaction between arylboronic acid and I<sub>2</sub> [Scheme S1, (iii)]. These results suggested that the in-situ formation of iodine or iodoarene does not take place to trigger aminocarbonylation.

**Scheme S2.** Proposed mechanism of aminocarbonylation.

**(a) Reduction of nitroarene**

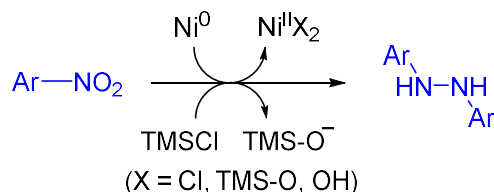

**(b) Formation of nickel(II) iodide**

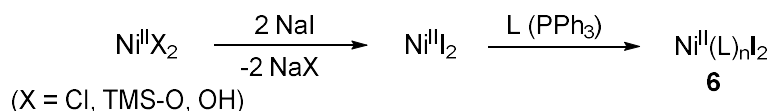

**(c) Transmetalation of arylboronic acid and CO insertion to form acyl-Ni**

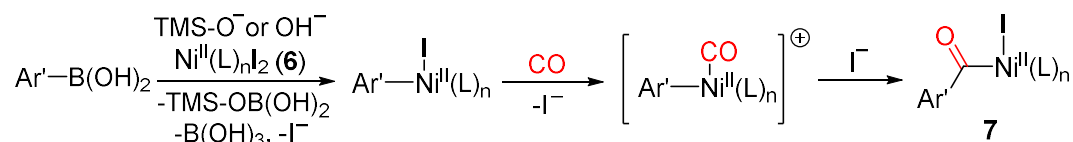

**(d) Amide synthesis from acyl-Ni and 1,2-diaryl hydrazine**

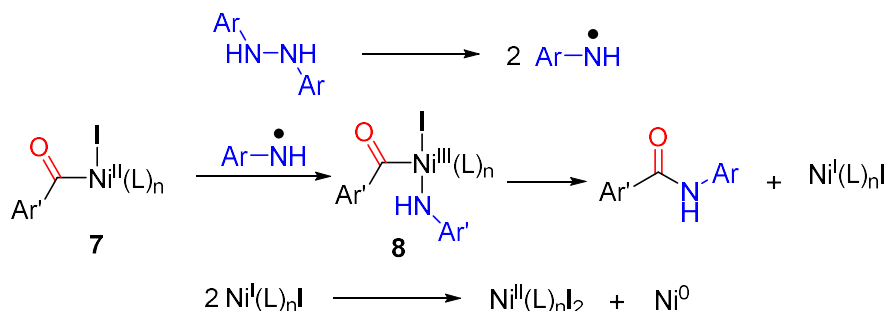

Based on the experimental results, we proposed a plausible mechanism of this aminocarbonylation reaction (Scheme S2). Ni metal (Ni(0)) reduces nitroarene successively to 1,2-diaryl hydrazine in the presence of TMSCl as a deoxygenating additive [Scheme S2(a)]. Meanwhile, Ni(0) is oxidized to Ni(II) salts, in which the counter anion could be chloride or O-centered ligands [trimethylsilanolate (TMS-O<sup>-</sup>), hydroxide (OH<sup>-</sup>)] originated from the reduction process of nitroarene. Ni(II) salts then undergo ligand substitution with NaI to form Ni<sup>II</sup>I<sub>2</sub>, which further reacts with PPh<sub>3</sub> to form ligated Ni<sup>II</sup>I<sub>2</sub> complexes **6** [Scheme S2(b)]. We speculated that the formation of complex **6** could prevent Ni precipitation with O-centered ligands. The good leaving group ability of iodide also enables rapid iodide dissociation from **6**,

providing vacant site to effect transmetalation of arylboronic acid via the activation with  $\text{TMS-O}^-$  or  $\text{OH}^-$ , as well as the subsequent CO insertion to form acyl- $\text{Ni}^{\text{II}}$  intermediate **7** [Scheme S2(c)]. 1,2-Diaryl hydrazine bears a weak N-N bond (bond dissociation energy  $\sim 39 \text{ kcal mol}^{-1}$ ) and likely splits readily into amino radicals, which then react with **7** to give  $\text{Ni}^{\text{III}}$ (acyl)(amino) complex **8** [Scheme S2(d)]. Finally, **7** undergoes reductive elimination to afford the amide product, while the co-product  $\text{Ni}(\text{I})$  species could disproportionate to regenerate  $\text{Ni}^{\text{II}}\text{I}_2$  and  $\text{Ni}(0)$ . The detailed reaction mechanism will be subjected to the dedicated study in the future.

## General Considerations

### (A) General Analytical Information

Nuclear Magnetic Resonance (NMR) spectra were recorded on a Bruker Avance 400 MHz at ambient temperature. All  $^1\text{H}$  NMR spectra were measured in part per million (ppm) relative to the signal of tetramethylsilane (TMS, 0.00 ppm), the signal of residual chloroform in deuterated chloroform ( $\text{CDCl}_3$ , 7.26 ppm), or the signal of residual dimethyl sulfoxide in dimethyl- $d_6$  sulfoxide ( $\text{DMSO}-d_6$ , 2.50 ppm).<sup>1</sup> Data for  $^1\text{H}$  NMR were reported as follows: chemical shift, multiplicity (s = singlet, d = doublet, t = triplet, q = quartet, quint = quintet, sex = sextet, m = multiplet), coupling constant ( $J$ , in Hz), and integration. All  $^{13}\text{C}$  NMR spectra were reported in ppm relative to  $\text{CDCl}_3$  (77.16 ppm) or  $\text{DMSO}-d_6$  (39.52 ppm)<sup>1</sup> and were obtained with complete  $^1\text{H}$  decoupling. High-resolution mass spectrometry (HRMS) images were obtained on a microTOF-QII or Waters Micromass GCT Premier Instrument.

### (B) General Reagent Information

Unless otherwise noted, all chemicals were used as received without further purifications. *N,N*-Dimethylacetamide (DMA, 99.8% purity) were dried with 4 Å molecular sieve beads prior to use. Carbon monoxide (CO), nickel powder (Ni), triphenylphosphine ( $\text{PPh}_3$ ), and sodium iodide (NaI) were in 99.9%, 99.9%, 98%, and 99% purities, respectively. Chlorotrimethylsilane ( $\text{TMSCl}$ , 98% purity) was stored in the refrigerator prior to use. The following known starting materials (nitroarenes) were prepared according to the literature procedures.<sup>2-6</sup>

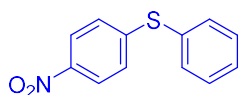

(4-nitrophenyl)(phenyl)sulfane <sup>2</sup>

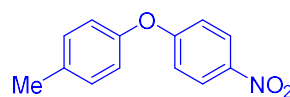

1-methyl-4-(4-nitrophenoxy)benzene <sup>3</sup>

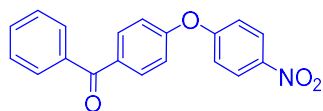

(4-(4-nitrophenoxy)phenyl)(phenyl)methanone <sup>4</sup>

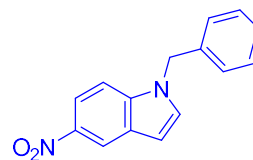

1-benzyl-5-nitro-1H-indole <sup>5</sup>

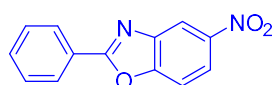

5-nitro-2-phenylbenzo[d]oxazole <sup>6</sup>

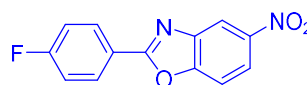

2-(4-fluorophenyl)-5-nitrobenzo[d]oxazole <sup>6</sup>

### (C) General Manipulation Considerations

All manipulations for direct reductive aminocarbonylation of nitroarenes with arylboronic acids were set up in a 20 mL rubber septum-capped Schlenk tube. Flash column chromatography was performed using silica gel (200-300 mesh). The eluents used for column chromatography were presented as ratios of solvent volumes. Yields reported in the publication are isolated yields unless otherwise noted. All new amide products were characterized by <sup>1</sup>H and <sup>13</sup>C NMR spectroscopies and high-resolution mass spectrometry (HRMS). All known amide products were characterized by <sup>1</sup>H and <sup>13</sup>C NMR spectroscopies, which were further compared with the reported data when provided.

## Experimental Section

**Nickel Metal-mediated Aminocarbonylation of Arylboronic Acids with Nitroarenes (General Procedure).** An oven-dried 10 mL Schlenk tube equipped with a Teflon-coated magnetic stir bar was sequentially charged with nickel powder (Ni, 3 equiv, 1.5 mmol, 87 mg), arylboronic acid (1.5 equiv, 0.75 mmol), nitroarene (1 equiv, 0.50 mmol), triphenylphosphine (PPh<sub>3</sub>, 1 equiv, 0.5 mmol, 131 mg), and sodium iodide (NaI, 2 equiv, 1.0 mmol, 150 mg). The tube was capped with an airtight rubber septum, and the tube was degassed *in vacuo* and then backfilled with carbon monoxide (CO) for three times via a CO-filled balloon. After being degassed and equipped with a CO-filled balloon, *N,N*-dimethylacetamide solvent (DMA, 1.5 mL) followed by chlorotrimethylsilane (TMSCl, 3 equiv, 1.50 mmol, 190  $\mu$ L) were then transferred into the reaction mixture via a syringe. The reaction mixture was stirred at 135 °C in a preheated oil bath for 16 h. After the reaction, the reaction mixture was cooled down to room temperature. The reaction mixture was diluted with ethyl acetate (EtOAc, ~50 mL), and the organic fraction was further acidified with HCl solution (~1 M (aq), ~10 mL), neutralized with NaOH solution (~1 M (aq), ~30 mL), washed with saturated NaCl solution, dried with anhydrous Na<sub>2</sub>SO<sub>4</sub>, and then concentrated *in vacuo* with the aid of a rotary evaporator. The residue was purified by flash column chromatography using a mixture of petroleum ether (PE) and ethyl acetate (EtOAc) as eluents to afford the amide product.

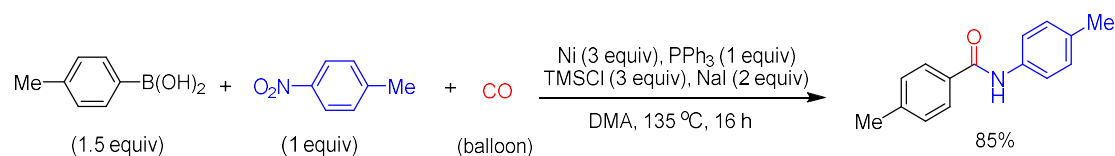

**4-Methyl-N-*p*-tolylbenzamide (3a).**<sup>7</sup> Following the general procedure, the title compound was prepared using 4-methylphenylboronic acid (1.5 equiv, 0.75 mmol, 101 mg) and 1-methyl-4-nitrobenzene (1.0 equiv, 0.50 mmol, 69 mg) using PE/EtOAc (8:1) as an eluent to afford the title compound as a white amorphous solid (95 mg, 85%). <sup>1</sup>H NMR (400 MHz, CDCl<sub>3</sub>)  $\delta$  8.02 (s, 1H), 7.73 (d, *J* = 7.7 Hz, 2H), 7.51 (d, *J*

= 7.9 Hz, 2H), 7.20 (d,  $J$  = 7.8 Hz, 2H), 7.12 (d,  $J$  = 7.9 Hz, 2H), 2.38 (s, 3H), 2.31 (s, 3H).  $^{13}\text{C}$  NMR (101 MHz,  $\text{CDCl}_3$ )  $\delta$  165.77, 142.14, 135.55, 134.01, 132.18, 129.51, 129.33, 127.09, 120.40, 21.51, 20.94.

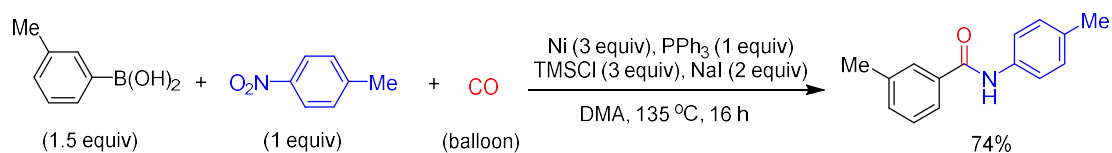

**3-Methyl-*N*-*p*-tolylbenzamide (**3b**).**<sup>8</sup> Following the general procedure, the title compound was prepared using 3-methylphenylboronic acid (1.5 equiv, 0.75 mmol, 101 mg) and 1-methyl-4-nitrobenzene (1.0 equiv, 0.50 mmol, 69 mg) using PE/EtOAc (8:1) as an eluent to afford the title compound as a white amorphous solid (83 mg, 74%).  $^1\text{H}$  NMR (400 MHz,  $\text{CDCl}_3$ )  $\delta$  7.98 (s, 1H), 7.69 – 7.57 (m, 2H), 7.51 (d,  $J$  = 8.0 Hz, 2H), 7.34–7.29 (m, 2H), 7.13 (d,  $J$  = 7.9 Hz, 2H), 2.37 (s, 3H), 2.32 (s, 3H).  $^{13}\text{C}$  NMR (101 MHz,  $\text{CDCl}_3$ )  $\delta$  165.98, 138.58, 135.49, 135.06, 134.10, 132.43, 129.53, 128.55, 127.83, 124.01, 120.38, 21.39, 20.94.

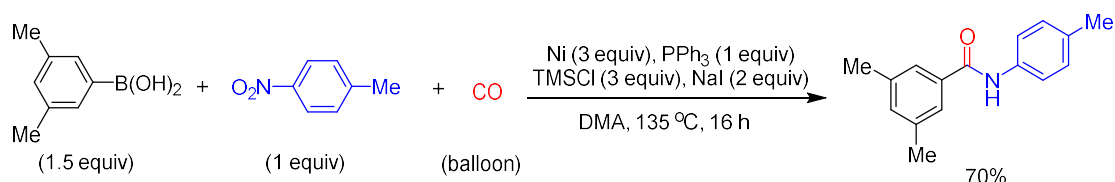

**3,5-Dimethyl-*N*-*p*-tolylbenzamide (**3c**).**<sup>9</sup> Following the general procedure, the title compound was prepared using 3,5-dimethylphenylboronic acid (1.5 equiv, 0.75 mmol, 113 mg) and 1-methyl-4-nitrobenzene (1.0 equiv, 0.50 mmol, 69 mg) using PE/EtOAc (8:1) as an eluent to afford the title compound as a white amorphous solid (84 mg, 70%).  $^1\text{H}$  NMR (400 MHz,  $\text{CDCl}_3$ )  $\delta$  7.72 (s, 1H), 7.52 (d,  $J$  = 8.0 Hz, 2H), 7.47–7.45 (m, 2H), 7.20 – 7.12 (m, 3H), 2.39 (s, 6H), 2.34 (s, 3H).  $^{13}\text{C}$  NMR (101 MHz,  $\text{CDCl}_3$ )  $\delta$  165.93, 138.50, 135.48, 135.14, 134.07, 133.33, 129.56, 124.73, 120.17, 21.29, 20.91.



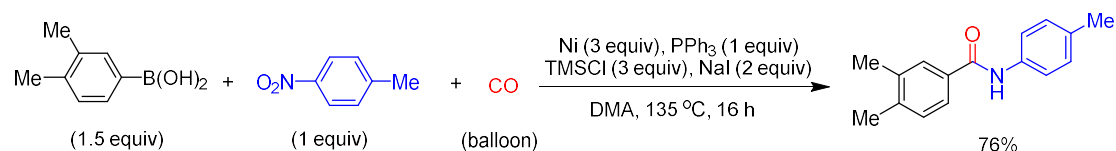

**3,4-Dimethyl-*N*-*p*-tolylbenzamide (3d).**<sup>10</sup> Following the general procedure, the title compound was prepared using 3,4-dimethylphenylboronic acid (1.5 equiv, 0.75 mmol, 113 mg) and 1-methyl-4-nitrobenzene (1.0 equiv, 0.50 mmol, 69 mg) using PE/EtOAc (8:1) as an eluent to afford the title compound as a white amorphous solid (91 mg, 76%). <sup>1</sup>H NMR (400 MHz, CDCl<sub>3</sub>) δ 8.00 (s, 1H), 7.61 (s, 1H), 7.56-7.50 (m, 3H), 7.16-7.11 (m, 3H), 2.31 (s, 3H), 2.28 (s, 3 H), 2.26 (s, 3 H). <sup>13</sup>C NMR (101 MHz, CDCl<sub>3</sub>) δ 166.06, 140.74, 137.01, 135.69, 133.87, 132.55, 129.77, 129.45, 128.44, 124.47, 120.48, 20.94, 19.85, 19.76.

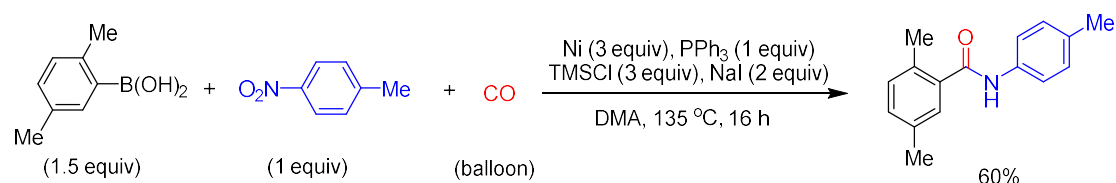

**2,5-Dimethyl-*N*-*p*-tolylbenzamide (3e).**<sup>11</sup> Following the general procedure, the title compound was prepared using 2,5-dimethylphenylboronic acid (1.5 equiv, 0.75 mmol, 113 mg) and 1-methyl-4-nitrobenzene (1.0 equiv, 0.50 mmol, 69 mg) using PE/EtOAc (8:1) as an eluent to afford the title compound as a white amorphous solid (71 mg, 60%). <sup>1</sup>H NMR (400 MHz, CDCl<sub>3</sub>) δ 7.49 (d, *J* = 7.9 Hz, 2H), 7.44 (s, 1H), 7.28 (s, 1H), 7.18 – 7.12 (m, 4H), 2.44 (s, 3H), 2.34 (s, 6H). <sup>13</sup>C NMR (101 MHz, CDCl<sub>3</sub>) δ 168.14, 136.43, 135.48, 134.12, 133.14, 131.14, 130.86, 129.56, 127.25, 119.93, 20.92, 20.87, 19.35 (13 carbon signals were observed out of expected 14 carbon signals).

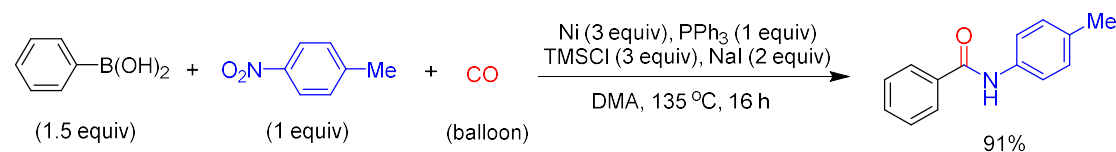

***N*-*p*-Tolylbenzamide (3f).**<sup>12</sup> Following the general procedure, the title compound was prepared using phenylboronic acid (1.5 equiv, 0.75 mmol, 92 mg) and

1-methyl-4-nitrobenzene (1 equiv, 0.50 mmol, 69 mg) using PE/EtOAc (8:1) as an eluent to afford the title compound as a white amorphous solid (96 mg, 91%). <sup>1</sup>H NMR (400 MHz, CDCl<sub>3</sub>) δ 7.90-7.82 (m, 3H), 7.56-7.50 (m, 3H), 7.46 (t, *J* = 7.5 Hz, 2H), 7.16 (d, *J* = 8.0 Hz, 2H), 2.34 (s, 3H). <sup>13</sup>C NMR (101 MHz, CDCl<sub>3</sub>) δ 165.74, 135.39, 135.08, 134.22, 131.71, 129.57, 128.73, 127.03, 120.36, 20.94.

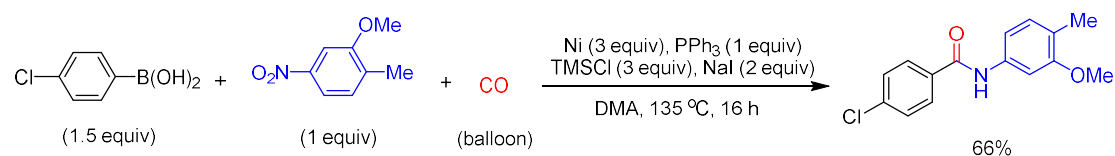

**4-Chloro-*N*-(3-methoxy-4-methylphenyl)benzamide (3g).**<sup>13</sup> Following the general procedure, the title compound was prepared using 4-chlorophenylboronic acid (1.5 equiv, 0.75 mmol, 117 mg) and 2-methoxy-1-methyl-4-nitrobenzene (1.0 equiv, 0.50 mmol, 84 mg) using PE/EtOAc (8:1) as an eluent to afford the title compound as a white amorphous solid (91 mg, 66%). <sup>1</sup>H NMR (400 MHz, CDCl<sub>3</sub>) δ 7.88 – 7.76 (m, 3H), 7.48 – 7.41 (m, 3H), 7.08 (d, *J* = 7.9 Hz, 1H), 6.88 (d, *J* = 7.9 Hz, 1H), 3.84 (s, 3H), 2.20 (s, 3H). <sup>13</sup>C NMR (101 MHz, CDCl<sub>3</sub>) δ 164.59, 157.99, 138.07, 136.60, 133.37, 130.49, 129.04, 128.41, 123.18, 111.59, 103.04, 55.39, 15.88.

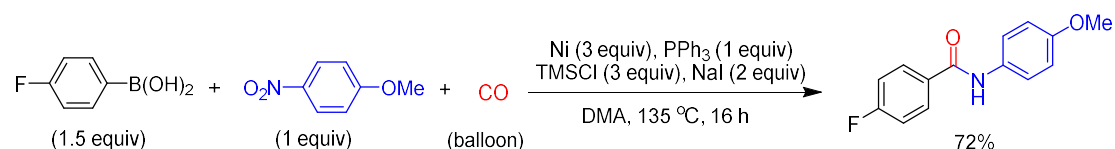

**4-Fluoro-*N*-(4-methoxyphenyl)benzamide (3h).**<sup>14</sup> Following the general procedure, the title compound was prepared using 4-fluorophenylboronic acid (1.5 equiv, 0.75 mmol, 106 mg) and 1-methoxy-4-nitrobenzene (1.0 equiv, 0.50 mmol, 76 mg) using PE/EtOAc (8:1) as an eluent to afford the title compound as a white amorphous solid (88.23 mg, 72%). <sup>1</sup>H NMR (400 MHz, CDCl<sub>3</sub>) δ 7.90-7.85 (m, 2H), 7.70 (s, 1H), 7.52 (d, *J* = 8.3 Hz, 2H), 7.16 (t, *J* = 8.4 Hz, 2H), 6.91 (d, *J* = 8.3 Hz, 2H), 3.82 (s, 3H). <sup>13</sup>C NMR (101 MHz, DMSO-*d*<sub>6</sub>) δ 163.97, 163.94 (d, *J*<sub>C-F</sub> = 247.1 Hz), 155.58, 132.09, 131.44 (d, *J*<sub>C-F</sub> = 2.1 Hz), 130.24 (d, *J*<sub>C-F</sub> = 9.0 Hz), 122.01, 115.28 (d, *J*<sub>C-F</sub> = 21.5 Hz), 113.74, 55.18.

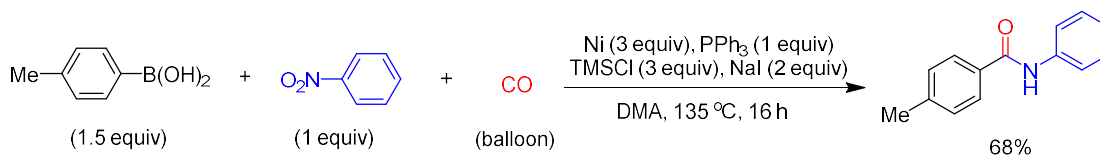

**4-Methyl-N-phenylbenzamide (3i).**<sup>15</sup> Following the general procedure, the title compound was prepared using 4-methylphenylboronic acid (1.5 equiv, 0.75 mmol, 101 mg) and nitrobenzene (1.0 equiv, 0.50 mmol, 62 mg) using PE/EtOAc (8:1) as an eluent to afford the title compound as a white amorphous solid (72 mg, 68%). <sup>1</sup>H NMR (400 MHz, CDCl<sub>3</sub>) δ 8.01 (s, 1H), 7.75 (d, *J* = 7.7 Hz, 2H), 7.64 (d, *J* = 7.9 Hz, 2H), 7.33 (t, *J* = 7.7 Hz, 2H), 7.23 (d, *J* = 8.0 Hz, 2H), 7.13 (t, *J* = 7.5 Hz, 1H), 2.40 (s, 3H). <sup>13</sup>C NMR (101 MHz, CDCl<sub>3</sub>) δ 165.86, 142.31, 138.10, 132.10, 129.39, 129.04, 127.11, 124.41, 120.30, 21.52.

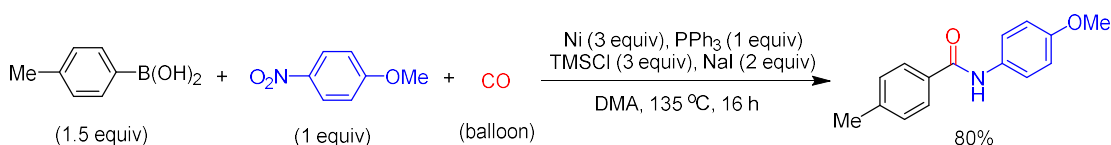

**N-(4-Methoxyphenyl)-4-methylbenzamide (3j).**<sup>16</sup> Following the general procedure, the title compound was prepared using 4-methylphenylboronic acid (1.5 equiv, 0.75 mmol, 101 mg) and 1-methoxy-4-nitrobenzene (1.0 equiv, 0.50 mmol, 77 mg) using PE/EtOAc (8:1) as an eluent to afford the title compound as a white amorphous solid (96 mg, 80%). <sup>1</sup>H NMR (400 MHz, CDCl<sub>3</sub>) δ 7.86 (s, 1H), 7.75 (d, *J* = 7.8 Hz, 2H), 7.53 (d, *J* = 8.4 Hz, 2H), 7.24 (s, 2H), 6.88 (d, *J* = 8.4 Hz, 2H), 3.80 (s, 3H), 2.41 (s, 3H). <sup>13</sup>C NMR (101 MHz, CDCl<sub>3</sub>) δ 165.63, 156.49, 142.19, 132.10, 131.11, 129.39, 127.02, 122.11, 114.18, 55.51, 21.53.

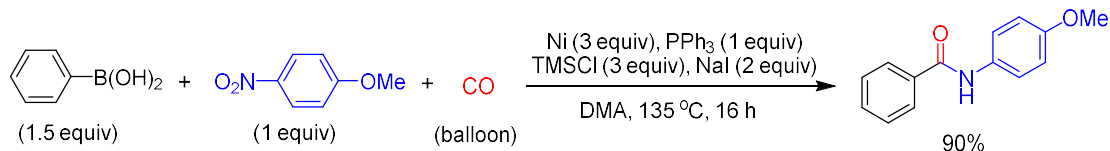

**N-(4-Methoxyphenyl)benzamide (3k).**<sup>17</sup> Following the general procedure, the title compound was prepared using phenylboronic acid (1.5 equiv, 0.75 mmol, 92 mg) and

1-methoxy-4-nitrobenzene (1.0 equiv, 0.50 mmol, 77 mg) using PE/EtOAc (6:1) as an eluent to afford the title compound as a white amorphous solid (102 mg, 90%). **<sup>1</sup>H NMR** (400 MHz, CDCl<sub>3</sub>) δ 7.87 (d, *J* = 7.6 Hz, 2H), 7.76 (s, 1H), 7.60 – 7.52 (m, 3H), 7.48 (t, *J* = 7.4 Hz, 2H), 6.91 (d, *J* = 8.4 Hz, 2H), 3.82 (s, 3H). **<sup>13</sup>C NMR** (101 MHz, CDCl<sub>3</sub>) δ 165.61, 156.62, 135.03, 131.73, 130.98, 128.77, 126.98, 122.08, 114.24, 55.53.

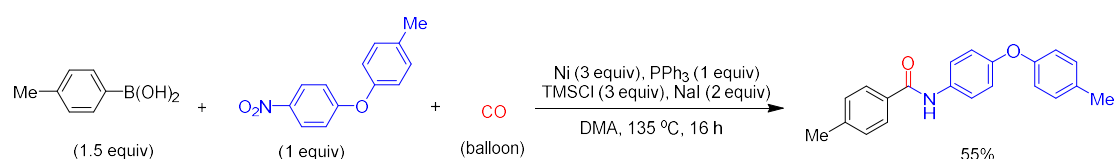

***N*-(4-(*p*-Tolyloxy)phenyl)-4-methylbenzamide (3l)**. Following the general procedure, the title compound was prepared using 4-methylphenylboronic acid (1.5 equiv, 0.75 mmol, 102 mg) and 1-(4-nitrophenoxy)-4-methylbenzene (1.0 equiv, 0.50 mmol, 114 mg) using PE/EtOAc (8:1) as an eluent to afford the title compound as a white amorphous solid (87 mg, 55%). **<sup>1</sup>H NMR** (400 MHz, CDCl<sub>3</sub>) δ 7.78-7.77 (m, 3H), 7.57 (d, *J* = 8.4 Hz, 2H), 7.29 (d, *J* = 7.9 Hz, 2H), 7.13 (d, *J* = 8.0 Hz, 2H), 7.00 (d, *J* = 8.4 Hz, 2H), 6.91 (d, *J* = 8.0 Hz, 2H), 2.43 (s, 3H), 2.33 (s, 3H). **<sup>13</sup>C NMR** (101 MHz, CDCl<sub>3</sub>) δ 165.56, 155.05, 154.25, 142.38, 133.14, 132.78, 132.02, 130.23, 129.46, 126.99, 121.90, 119.15, 118.71, 21.51, 20.69. **HRMS** (ESI): Calcd for C<sub>21</sub>H<sub>19</sub>NO<sub>2</sub> [M+H]<sup>+</sup>: 318.1489; Found: 318.1488.

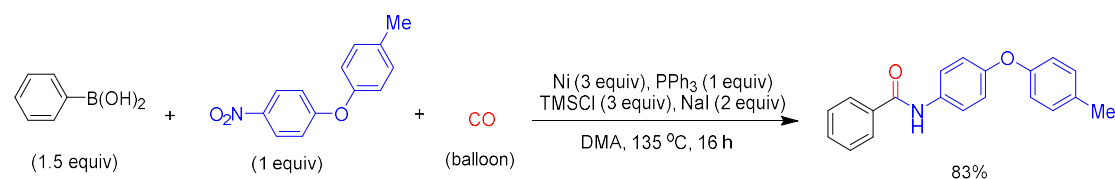

***N*-(4-(*p*-Tolyloxy)phenyl)benzamide (3m)**. Following the general procedure, the title compound was prepared using phenylboronic acid (1.5 equiv, 0.75 mmol, 92 mg) and 1-(4-nitrophenoxy)-4-methylbenzene (1.0 equiv, 0.50 mmol, 115 mg) using PE/EtOAc (8:1) as an eluent to afford the title compound as a white amorphous solid (126 mg, 83%). **<sup>1</sup>H NMR** (400 MHz, CDCl<sub>3</sub>) δ 7.87 (d, *J* = 7.5 Hz, 2H), 7.79 (s, 1H),

7.61=7.54 (m, 3H), 7.50 (t,  $J = 7.3$  Hz, 2H), 7.14 (d,  $J = 8.0$  Hz, 2H), 7.01 (d,  $J = 8.6$  Hz, 2H), 6.92 (d,  $J = 8.0$  Hz, 2H), 2.34 (s, 3H).  $^{13}\text{C}$  NMR (101 MHz,  $\text{CDCl}_3$ )  $\delta$  165.66, 154.97, 154.37, 134.89, 132.97, 132.86, 131.88, 130.26, 128.84, 126.99, 121.95, 119.14, 118.75, 20.73. **HRMS** (ESI): Calcd for  $\text{C}_{20}\text{H}_{17}\text{NO}_2$   $[\text{M}+\text{H}]^+$ : 304.1332; Found: 304.1331.

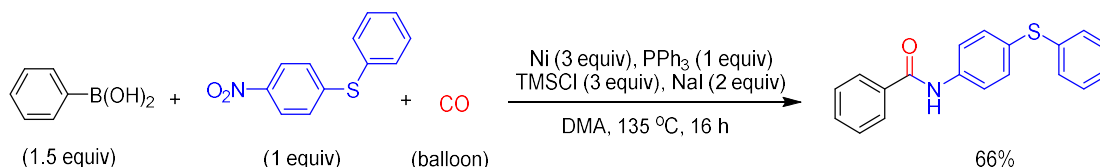

***N*-(4-(Phenylthio)phenyl)benzamide (3n).**<sup>18</sup> Following the general procedure, the title compound was prepared using phenylboronic acid (1.5 equiv, 0.75 mmol, 92 mg) and (4-nitrophenyl)(phenyl)sulfane (1.0 equiv, 0.50 mmol, 116 mg) using PE/EtOAc (8:1) as an eluent to afford the title compound as a white amorphous solid (101 mg, 66%).  $^1\text{H}$  NMR (400 MHz,  $\text{CDCl}_3$ )  $\delta$  7.92 – 7.83 (m, 3H), 7.62 (d,  $J = 8.8$  Hz, 2H), 7.56 (t,  $J = 7.3$  Hz, 1H), 7.49 (t,  $J = 7.3$  Hz, 2H), 7.41 (d,  $J = 8.1$  Hz, 2H), 7.31-7.27 (m, 4H), 7.24-1.19 (m, 1H).  $^{13}\text{C}$  NMR (101 MHz,  $\text{CDCl}_3$ )  $\delta$  165.71, 137.47, 136.74, 134.75, 133.03, 132.02, 130.41, 129.98, 129.14, 128.86, 127.02, 126.66, 120.90.

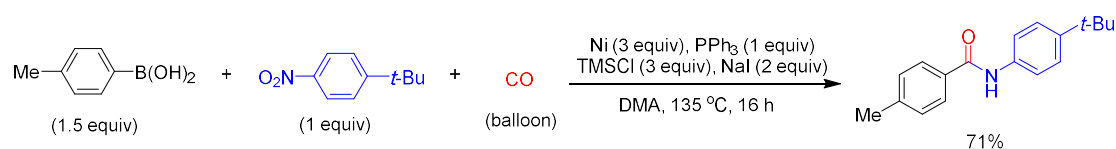

***N*-(4-*tert*-Butylphenyl)-4-methylbenzamide (3o).**<sup>19</sup> Following the general procedure, the title compound was prepared using 4-methylphenylboronic acid (1.5 equiv, 0.75 mmol, 102 mg) and 1-*tert*-butyl-4-nitrobenzene (1.0 equiv, 0.50 mmol, 87 mg) using PE/EtOAc (8:1) as an eluent to afford the title compound as a white amorphous solid (96 mg, 71%).  $^1\text{H}$  NMR (400 MHz,  $\text{CDCl}_3$ )  $\delta$  7.92 (s, 1H), 7.75 (d,  $J = 8.1$  Hz, 2H), 7.56 (d,  $J = 7.8$  Hz, 2H), 7.36 (d,  $J = 7.7$  Hz, 2H), 7.24 (d,  $J = 8.0$  Hz, 2H), 2.40 (s, 3H), 1.31 (s, 9H).  $^{13}\text{C}$  NMR (101 MHz,  $\text{CDCl}_3$ )  $\delta$  165.69, 147.39, 142.19, 135.44, 132.21, 129.38, 127.06, 125.87, 120.04, 34.42, 31.40, 21.51.

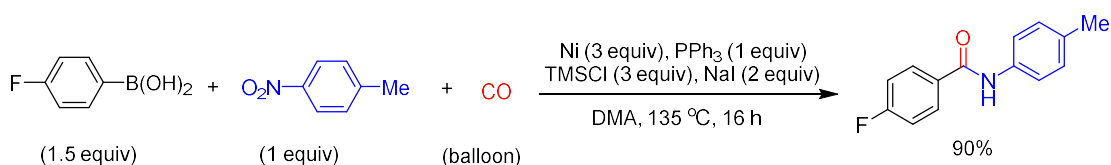

**4-Fluoro-*N*-*p*-tolylbenzamide (3p).**<sup>20</sup> Following the general procedure, the title compound was prepared using 4-fluorophenylboronic acid (1.5 equiv, 0.75 mmol, 105 mg) and 1-methyl-4-nitrobenzene (1.0 equiv, 0.50 mmol, 68 mg) using PE/EtOAc (8:1) as an eluent to afford the title compound as a white amorphous solid (102 mg, 90%). <sup>1</sup>H NMR (400 MHz, CDCl<sub>3</sub>) δ 7.93 – 7.82 (m, 2H), 7.75 (s, 1H), 7.50 (d, *J* = 7.9 Hz, 2H), 7.23 – 7.07 (m, 4H), 2.34 (s, 3H). <sup>13</sup>C NMR (101 MHz, CDCl<sub>3</sub>) δ 164.98 (d, *J*<sub>C-F</sub> = 250.8 Hz), 164.72, 135.33, 134.56, 131.38 (d, *J*<sub>C-F</sub> = 3.2 Hz), 129.76, 129.51 (d, *J*<sub>C-F</sub> = 8.9 Hz), 120.50, 115.96 (d, *J*<sub>C-F</sub> = 21.9 Hz), 21.06.

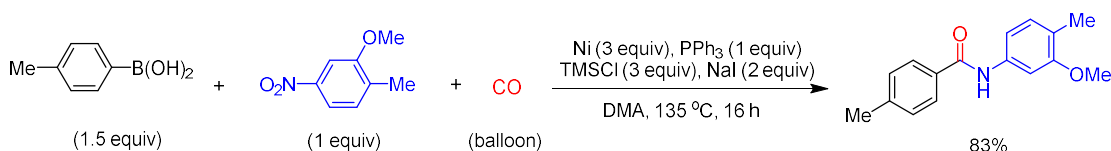

***N*-(3-Methoxy-4-methylphenyl)-4-methylbenzamide (3q).** Following the general procedure, the title compound was prepared using 4-methylphenylboronic acid (1.5 equiv, 0.75 mmol, 103 mg) and 2-methoxy-1-methyl-4-nitrobenzene (1.0 equiv, 0.50 mmol, 84 mg) using PE/EtOAc (8:1) as an eluent to afford the title compound as a white amorphous solid (106 mg, 83%). <sup>1</sup>H NMR (400 MHz, CDCl<sub>3</sub>) δ 7.86 (s, 1H), 7.76 (d, *J* = 7.8 Hz, 2H), 7.51 (s, 1H), 7.26 (d, *J* = 8.6 Hz, 2H), 7.07 (d, *J* = 7.9 Hz, 1H), 6.88 (d, *J* = 7.9 Hz, 1H), 3.84 (s, 3H), 2.41 (s, 3H), 2.19 (s, 3H). <sup>13</sup>C NMR (101 MHz, CDCl<sub>3</sub>) δ 165.67, 157.94, 142.26, 137.06, 132.14, 130.40, 129.40, 127.00, 122.68, 111.53, 103.05, 55.35, 21.50, 15.85. HRMS (ESI): Calcd for C<sub>16</sub>H<sub>17</sub>NO<sub>2</sub> [M+H]<sup>+</sup>: 256.1332; Found: 256.1334.

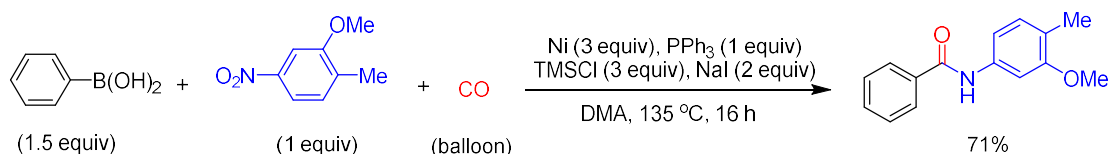

***N*-(3-Methoxy-4-methylphenyl)benzamide (3r).**<sup>21</sup> Following the general procedure,

the title compound was prepared using phenylboronic acid (1.5 equiv, 0.75 mmol, 92 mg) and 2-methoxy-1-methyl-4-nitrobenzene (1.0 equiv, 0.50 mmol, 84 mg) using PE/EtOAc (8:1) as an eluent to afford the title compound as a white amorphous solid (86 mg, 71%). <sup>1</sup>H NMR (400 MHz, CDCl<sub>3</sub>) δ 7.96 (s, 1H), 7.85 (d, *J* = 7.6 Hz, 2H), 7.56 – 7.40 (m, 4H), 7.07 (d, *J* = 7.9 Hz, 1H), 6.90 (d, *J* = 8.0 Hz, 1H), 3.82 (s, 3H), 2.19 (s, 3H). <sup>13</sup>C NMR (101 MHz, CDCl<sub>3</sub>) δ 165.84, 157.93, 136.96, 135.01, 131.74, 130.43, 128.72, 127.03, 122.85, 111.73, 103.16, 55.33, 15.86.

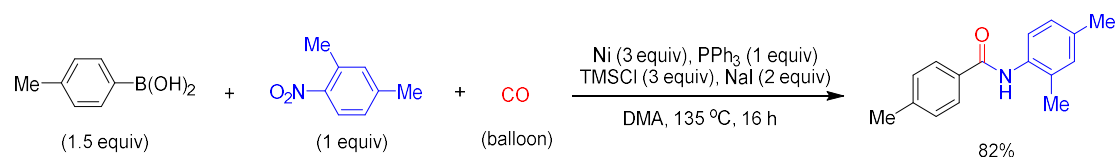

**4-Methyl-N-(2,4-dimethylphenyl)benzamide (3s).**<sup>22</sup> Following the general procedure, the title compound was prepared using 4-methylphenylboronic acid (1.5 equiv, 0.75 mmol, 102 mg) and 2,4-dimethyl-1-nitrobenzene (1.0 equiv, 0.50 mmol, 76 mg) using PE/EtOAc (8:1) as an eluent to afford the title compound as a white amorphous solid (98 mg, 82%). <sup>1</sup>H NMR (400 MHz, CDCl<sub>3</sub>) δ 7.81-7.71 (m, 3H), 7.60 (s, 1H), 7.28 (d, *J* = 7.7 Hz, 2H), 7.08-7.02 (m, 2H), 2.42 (s, 3H), 2.31 (s, 3H), 2.28 (s, 3H). <sup>13</sup>C NMR (101 MHz, CDCl<sub>3</sub>) δ 165.62, 142.23, 135.01, 133.24, 132.22, 131.20, 129.54, 129.43, 127.39, 127.06, 123.41, 21.51, 20.92, 17.80.

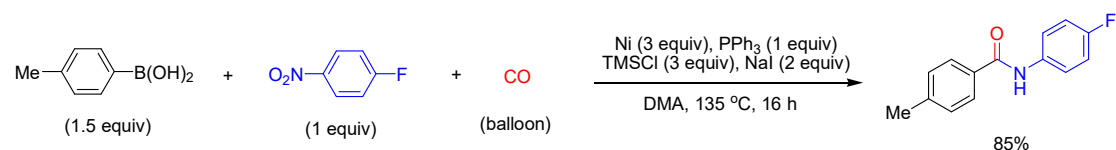

**N-(4-Fluorophenyl)-4-methylbenzamide (3t).**<sup>23</sup> Following the general procedure, the title compound was prepared using 4-methylphenylboronic acid (1.5 equiv, 0.75 mmol, 102 mg) and 1-fluoro-4-nitrobenzene (1.0 equiv, 0.50 mmol, 70 mg) using PE/EtOAc (8:1) as an eluent to afford the title compound as a white amorphous solid (97 mg, 85%). <sup>1</sup>H NMR (400 MHz, CDCl<sub>3</sub>) δ 7.80 (s, 1 H), 7.76 (d, *J* = 8.6 Hz, 2H), 7.59 (dd, *J* = 7.7 Hz, *J* = 5.0 Hz, 2H), 7.29 (d, *J* = 7.8 Hz, 2H), 7.10 – 7.01 (m, 2H), 2.43 (s, 3H). <sup>13</sup>C NMR (101 MHz, CDCl<sub>3</sub>) δ 165.76, 159.58 (d, *J*<sub>C-F</sub> = 242.2 Hz),

142.66, 134.10 (d,  $J_{\text{C-F}} = 2.6$  Hz), 131.93, 129.62, 127.13, 122.14 (d,  $J_{\text{C-F}} = 7.9$  Hz), 115.87 (d,  $J_{\text{C-F}} = 22.4$  Hz), 21.7.

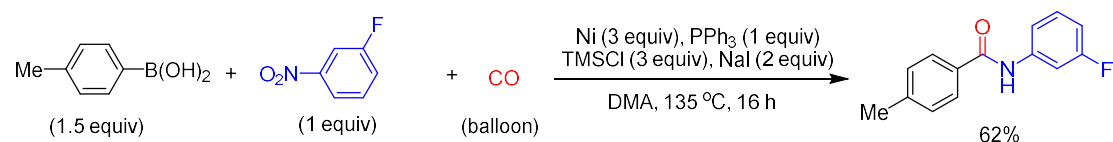

**N-(3-Fluorophenyl)-4-methylbenzamide (3u).**<sup>24</sup> Following the general procedure, the title compound was prepared using 4-methylphenylboronic acid (1.5 equiv, 0.75 mmol, 102 mg) and 1-fluoro-3-nitrobenzene (1.0 equiv, 0.50 mmol, 70 mg) using PE/EtOAc (8:1) as an eluent to afford the title compound as a white amorphous solid (71 mg, 62%). <sup>1</sup>H NMR (400 MHz, CDCl<sub>3</sub>)  $\delta$  7.89 (s, 1H), 7.76 (d,  $J = 7.8$  Hz, 2H), 7.64 (d,  $J = 10.9$  Hz, 1H), 7.33-7.25 (m, 4H), 6.84 (t,  $J = 8.4$  Hz, 1H), 2.43 (s, 3H). <sup>13</sup>C NMR (101 MHz, CDCl<sub>3</sub>)  $\delta$  165.84, 163.16 (d,  $J_{\text{C-F}} = 243.2$  Hz), 142.81, 139.70 (d,  $J_{\text{C-F}} = 10.9$  Hz), 131.81, 130.22 (d,  $J_{\text{C-F}} = 9.3$  Hz), 129.62, 127.16, 115.42 (d,  $J_{\text{C-F}} = 2.9$  Hz), 111.24 (d,  $J_{\text{C-F}} = 21.2$  Hz), 107.73 (d,  $J_{\text{C-F}} = 26.2$  Hz), 21.7.

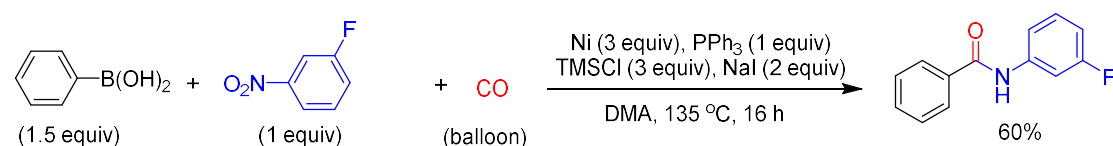

**N-(3-Fluorophenyl)benzamide (3v).**<sup>25</sup> Following the general procedure, the title compound was prepared using phenylboronic acid (1.5 equiv, 0.75 mmol, 91 mg) and 1-fluoro-3-nitrobenzene (1.0 equiv, 0.50 mmol, 71 mg) using PE/EtOAc (8:1) as an eluent to afford the title compound as a white amorphous solid (64.2 mg, 60%). <sup>1</sup>H NMR (400 MHz, CDCl<sub>3</sub>)  $\delta$  7.92 (s, 1H), 7.86 (d,  $J = 7.6$  Hz, 2H), 7.63 (d,  $J = 10.7$  Hz, 1H), 7.56 (t,  $J = 7.3$  Hz, 1H), 7.49 (t,  $J = 7.5$  Hz, 2H), 7.34-7.24 (m, 2H), 6.85 (t,  $J = 7.8$  Hz, 1H). <sup>13</sup>C NMR (101 MHz, CDCl<sub>3</sub>)  $\delta$  165.92, 163.18 (d,  $J_{\text{C-F}} = 243.5$  Hz), 139.58 (d,  $J_{\text{C-F}} = 10.8$  Hz), 134.7, 132.2, 130.28 (d,  $J_{\text{C-F}} = 9.2$  Hz), 128.99, 127.15, 115.49 (d,  $J_{\text{C-F}} = 3.4$  Hz), 111.41 (d,  $J_{\text{C-F}} = 21.2$  Hz), 107.80 (d,  $J_{\text{C-F}} = 9.0$  Hz).





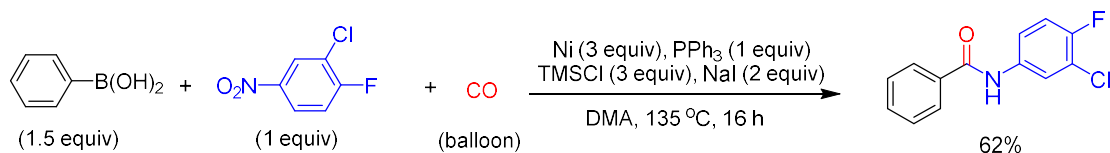

***N*-(3-Chloro-4-fluorophenyl)benzamide (3y).**<sup>27</sup> Following the general procedure, the title compound was prepared using phenylboronic acid (1.5 equiv, 0.75 mmol, 91 mg) and 2-chloro-1-fluoro-4-nitrobenzene (1.0 equiv, 0.50 mmol, 88 mg) using PE/EtOAc (8:1) as an eluent to afford the title compound as a white amorphous solid (77.5 mg, 62%). <sup>1</sup>H NMR (400 MHz, CDCl<sub>3</sub>) δ 7.95 (s, 1H), 7.86-7.81 (m, 3H), 7.56 (t, *J* = 7.4 Hz, 1H), 7.52 – 7.39 (m, 3H), 7.11 (t, *J* = 8.7 Hz, 1H). <sup>13</sup>C NMR (101 MHz, CDCl<sub>3</sub>) δ 165.84, 155.08 (d, *J*<sub>C-F</sub> = 245.2 Hz), 134.62 (d, *J*<sub>C-F</sub> = 3.4 Hz), 134.4, 132.3, 129.05, 127.13, 122.67, 121.4 (d, *J*<sub>C-F</sub> = 18.5 Hz), 120.06 (d, *J*<sub>C-F</sub> = 6.9 Hz), 116.84 (d, *J*<sub>C-F</sub> = 22.0 Hz).

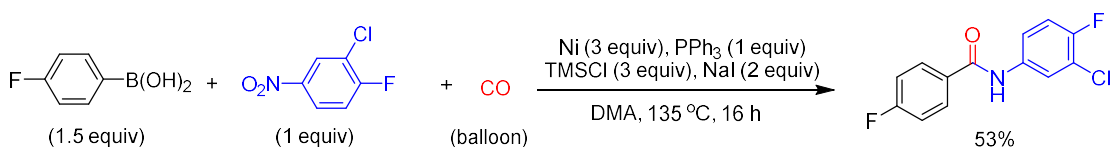

***N*-(3-Chloro-4-fluorophenyl)-4-fluorobenzamide (3z).** Following the general procedure, the title compound was prepared using 4-fluorophenylboronic acid (1.5 equiv, 0.75 mmol, 106 mg) and 2-chloro-1-fluoro-4-nitrobenzene (1.0 equiv, 0.50 mmol, 88 mg) using PE/EtOAc (8:1) as an eluent to afford the title compound as a white amorphous solid (72 mg, 53%). <sup>1</sup>H NMR (400 MHz, CDCl<sub>3</sub>) δ 7.93 (s, 1H), 7.85 (dd, *J* = 8.4, *J* = 5.2 Hz, 2H), 7.79 (d, *J* = 6.5 Hz, 1H), 7.44-7.40 (m, 1H), 7.18 – 7.08 (m, 3H). <sup>13</sup>C NMR (101 MHz, CDCl<sub>3</sub>) δ 165.20 (d, *J*<sub>C-F</sub> = 251.9 Hz), 164.92, 155.16 (d, *J*<sub>C-F</sub> = 245.4 Hz), 134.44 (d, *J*<sub>C-F</sub> = 3.3 Hz), 130.55 (d, *J*<sub>C-F</sub> = 3.2 Hz), 129.59 (d, *J*<sub>C-F</sub> = 8.9 Hz), 122.86, 121.41 (d, *J*<sub>C-F</sub> = 18.5 Hz), 120.26 (d, *J*<sub>C-F</sub> = 6.8 Hz), 116.84 (d, *J*<sub>C-F</sub> = 22.0 Hz), 116.11 (d, *J*<sub>C-F</sub> = 21.8 Hz). HRMS (ESI): Calcd for C<sub>13</sub>H<sub>8</sub>ClF<sub>2</sub>NO [M+Na]: 290.0155; Found: 290.0157.

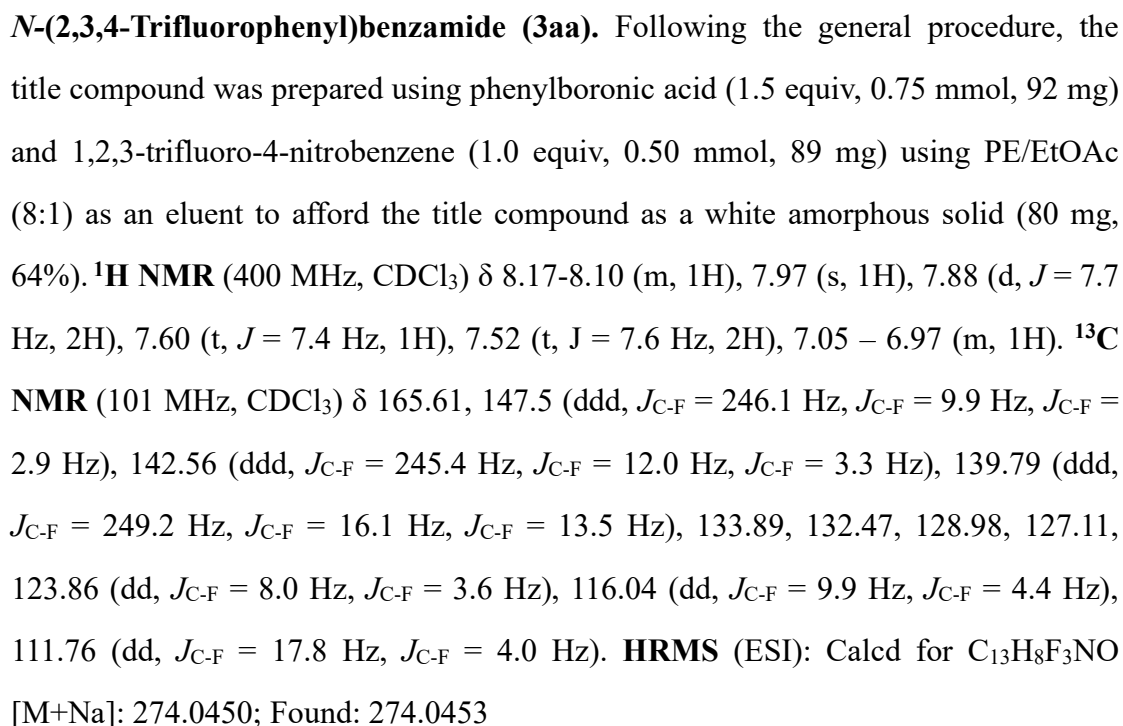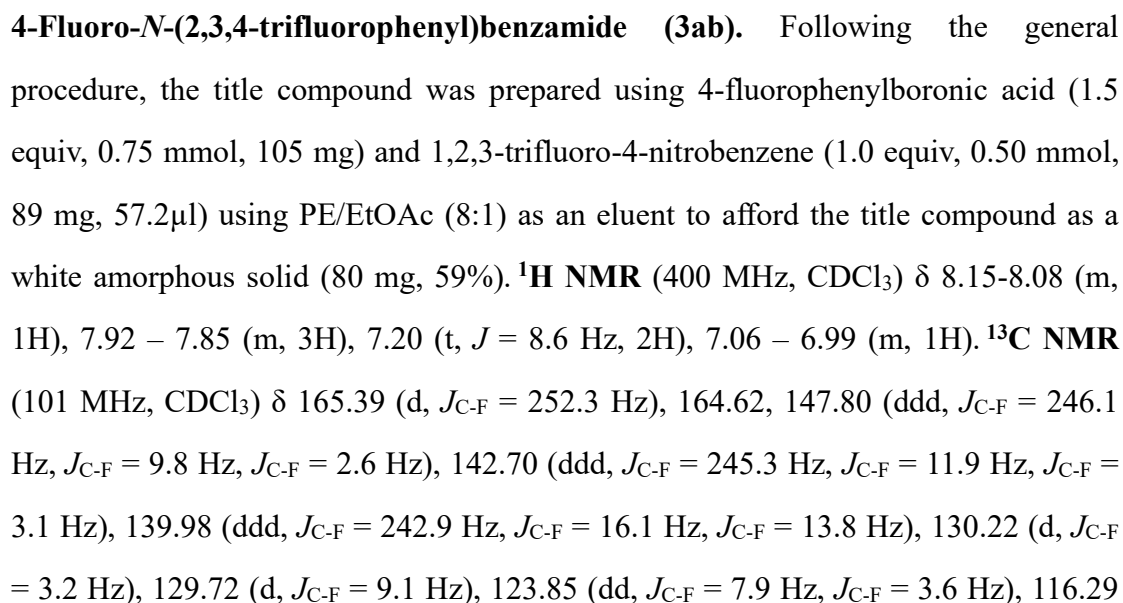

(d,  $J_{\text{C-F}} = 21.9$  Hz), 116.17 (dd,  $J_{\text{C-F}} = 7.5$  Hz,  $J_{\text{C-F}} = 3.3$  Hz), 111.98 (dd,  $J_{\text{C-F}} = 17.7$  Hz,  $J_{\text{C-F}} = 3.9$  Hz). **HRMS** (ESI): Calcd for  $\text{C}_{13}\text{H}_8\text{F}_3\text{NO}$   $[\text{M}+\text{H}]$ : 270.0537; Found: 270.0541

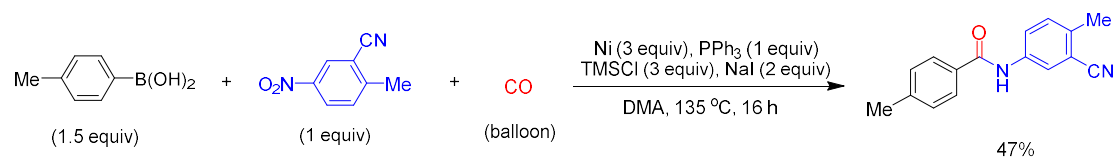

**N-(3-Cyano-4-methylphenyl)-4-methylbenzamide (3ac)**. Following the general procedure, the title compound was prepared using 4-methylphenylboronic acid (1.5 equiv, 0.75 mmol, 101 mg) and 2-methyl-5-nitrobenzonitrile (1.0 equiv, 0.50 mmol, 82 mg) using PE/EtOAc (8:1) as an eluent to afford the title compound as a white amorphous solid (56 mg, 47%). **<sup>1</sup>H NMR** (400 MHz, CDCl<sub>3</sub>)  $\delta$  8.10 (s, 1H), 7.95 (s, 1H), 7.79-7.72 (m, 3H), 7.31-7.23 (m, 3H), 2.51 (s, 3H), 2.42 (s, 3H). **<sup>13</sup>C NMR** (101 MHz, CDCl<sub>3</sub>)  $\delta$  165.88, 142.88, 137.68, 136.40, 131.29, 130.86, 129.51, 127.13, 124.66, 123.70, 117.83, 113.06, 21.55, 19.91. **HRMS** (ESI): Calcd for  $\text{C}_{16}\text{H}_{14}\text{N}_2\text{O}$   $[\text{M}+\text{H}]$ : 251.1179; Found: 251.1174.

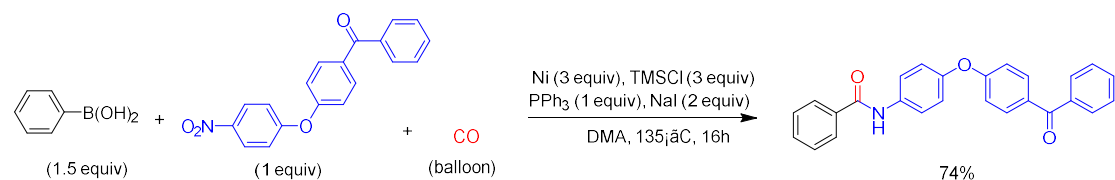

**N-(4-(4-Benzoylphenoxy)phenyl)benzamide (3ad)**. Following the general procedure, the title compound was prepared using phenylboronic acid (1.5 equiv, 0.75 mmol, 92 mg) and (4-(4-nitrophenoxy)phenyl)(phenyl)methanone (1.0 equiv, 0.50 mmol, 159 mg) using PE/EtOAc (8:1) as an eluent to afford the title compound as a white amorphous solid (145 mg, 74%). **<sup>1</sup>H NMR** (400 MHz, CDCl<sub>3</sub>)  $\delta$  7.98 (s, 1H), 7.89 (d,  $J = 7.7$  Hz, 2H), 7.82 (d,  $J = 8.4$  Hz, 2H), 7.78 (d,  $J = 7.6$  Hz, 2H), 7.69 (d,  $J = 8.4$  Hz, 2H), 7.60-7.54 (m, 2H), 7.52-7.46 (m, 4 H), 7.11 (d,  $J = 8.6$  Hz, 2H), 7.03 (d,  $J = 8.3$  Hz, 2H). **<sup>13</sup>C NMR** (101 MHz, CDCl<sub>3</sub>)  $\delta$  195.54, 165.77, 161.81, 151.92, 137.93, 134.76, 134.63, 132.51, 132.17, 131.98, 131.90, 129.82, 128.85, 128.27, 127.04,

122.10, 120.92, 116.89. **HRMS** (ESI): Calcd for C<sub>26</sub>H<sub>19</sub>NO<sub>3</sub> [M+H]: 394.1438; Found: 394.1439.

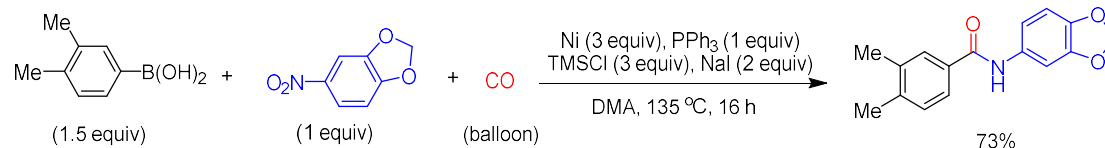

**N-(Benzo[d][1,3]dioxol-6-yl)-3,4-dimethylbenzamide (3ae)**. Following the general procedure, the title compound was prepared using 3,4-dimethylphenylboronic acid (1.5 equiv, 0.75 mmol, 112 mg) and 5-nitrobenzo[d][1,3]dioxole (1.0 equiv, 0.50 mmol, 84 mg) using PE/EtOAc (8:1) as an eluent to afford the title compound as a white amorphous solid (95 mg, 73%). **<sup>1</sup>H NMR** (400 MHz, CDCl<sub>3</sub>) δ 7.83 (s, 1H), 7.62 (s, 1H), 7.55 (d, *J* = 7.9 Hz, 1H), 7.35 (s, 1H), 7.19 (d, *J* = 7.8 Hz, 1H), 6.90 (d, *J* = 8.3 Hz, 1H), 6.76 (d, *J* = 8.3 Hz, 1H), 5.95 (s, 2H), 2.30 (s, 6H). **<sup>13</sup>C NMR** (101 MHz, CDCl<sub>3</sub>) δ 165.87, 147.80, 144.32, 140.92, 137.13, 132.36, 132.32, 129.84, 128.32, 124.34, 113.56, 108.05, 103.22, 101.28, 19.88, 19.81. **HRMS** (ESI): Calcd for C<sub>16</sub>H<sub>15</sub>NO<sub>3</sub> [M+H]: 270.1125; Found: 270.1129.

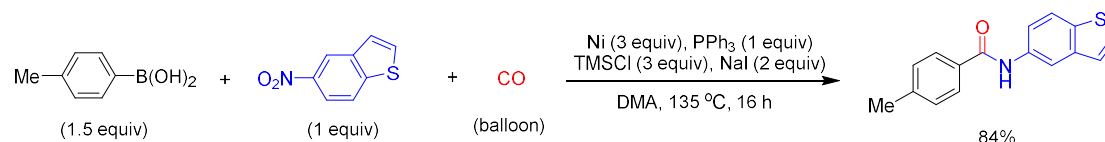

**N-(Benzo[b]thiophen-5-yl)-4-methylbenzamide (3af)**. Following the general procedure, the title compound was prepared using 4-methylphenylboronic acid (1.5 equiv, 0.75 mmol, 101 mg) and 5-nitrobenzo[b]thiophene (1.0 equiv, 0.50 mmol, 90 mg) using PE/EtOAc (8:1) as an eluent to afford the title compound as a white amorphous solid (112 mg, 84%). **<sup>1</sup>H NMR** (400 MHz, CDCl<sub>3</sub>) δ 8.32 (s, 1H), 7.94 (s, 1H), 7.85-7.76 (m, 3H), 7.49-7.43 (m, 2H), 7.33-7.28 (m, 3H), 2.43 (s, 3H). **<sup>13</sup>C NMR** (101 MHz, CDCl<sub>3</sub>) δ 165.74, 142.42, 140.27, 135.67, 134.81, 132.10, 129.49, 127.60, 127.03, 124.01, 122.78, 117.84, 114.90, 21.55. **HRMS** (ESI): Calcd for C<sub>16</sub>H<sub>13</sub>NOS [M+H]: 268.0791; Found: 268.0790.

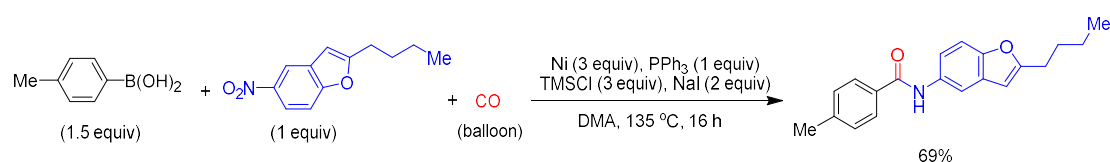

**N-(2-Butylbenzofuran-5-yl)-4-methylbenzamide (3ag).** Following the general procedure, the title compound was prepared using 4-methylphenylboronic acid (1.5 equiv, 0.75 mmol, 101 mg) and 2-butyl-5-nitrobenzofuran (1.0 equiv, 0.50 mmol, 109 mg) using PE/EtOAc (8:1) as an eluent to afford the title compound as a white amorphous solid (108 mg, 69%). **<sup>1</sup>H NMR** (400 MHz, CDCl<sub>3</sub>) δ 7.94-7.86 (m, 2H), 7.77 (d, *J* = 7.7 Hz, 2H), 7.34 (d, *J* = 8.6 Hz, 1H), 7.29-7.23 (m, 3H), 6.34 (s, 1H), 2.75 (t, *J* = 7.6 Hz, 2H), 2.41 (s, 3H), 1.72 (quint, *J* = 7.6 Hz, 2H), 1.42 (sex, *J* = 7.4 Hz, 2H), 0.96 (t, *J* = 7.3 Hz, 3H). **<sup>13</sup>C NMR** (101 MHz, CDCl<sub>3</sub>) δ 165.74, 160.80, 151.73, 142.10, 132.83, 132.24, 129.48, 129.34, 127.02, 116.59, 112.54, 110.66, 102.08, 29.69, 28.19, 22.28, 21.48, 13.82. **HRMS** (ESI): Calcd for C<sub>20</sub>H<sub>21</sub>NO<sub>2</sub>Na [M+Na]: 330.1465 ; Found: 330.1463.

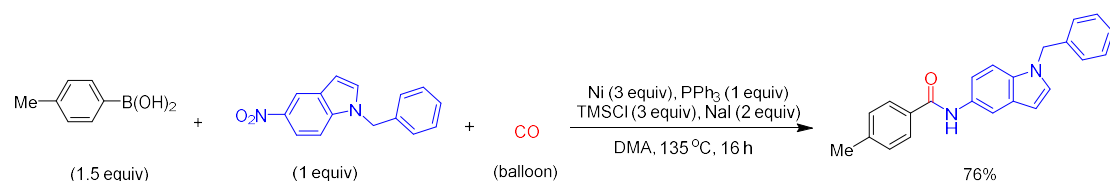

**N-(1-Benzyl-1H-indol-5-yl)-4-methylbenzamide (3ah).** Following the general procedure, the title compound was prepared using 4-methylphenylboronic acid (1.5 equiv, 0.75 mmol, 102 mg) and 1-benzyl-5-nitro-1H-indole (1.0 equiv, 0.50 mmol, 126 mg) using PE/EtOAc (8:1) as an eluent to afford the title compound as a white amorphous solid (129 mg, 76%). **<sup>1</sup>H NMR** (400 MHz, CDCl<sub>3</sub>) δ 7.98 (s, 1H), 7.85-7.73 (m, 3H), 7.35-7.20 (m, 8H), 7.15 (d, *J* = 3.1 Hz, 1H), 7.09 (d, *J* = 7.1 Hz, 2H), 6.54 (d, *J* = 3.1 Hz, 1H), 5.33 (s, 2H), 2.43 (s, 3H). **<sup>13</sup>C NMR** (101 MHz, CDCl<sub>3</sub>) δ 165.64, 141.97, 137.42, 133.90, 132.55, 130.43, 129.37, 129.24, 128.91, 128.78, 127.65, 126.99, 126.68, 116.27, 113.19, 109.94, 101.92, 50.25, 21.51. **HRMS** (ESI): Calcd for C<sub>23</sub>H<sub>20</sub>N<sub>2</sub>O [M+H]: 341.1648; Found: 341.1648.

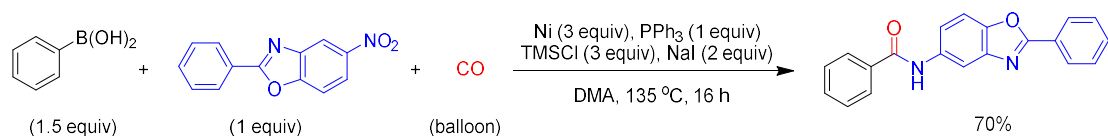

***N*-(2-Phenylbenzo[d]oxazol-5-yl)benzamide (4a).**<sup>28</sup> Following the general procedure, the title compound was prepared using phenylboronic acid (1.5 equiv, 0.75 mmol, 92 mg) and 5-nitro-2-phenylbenzo[d]oxazole (1.0 equiv, 0.50 mmol, 120 mg) using PE/EtOAc (5:1) as an eluent to afford the title compound as a white amorphous solid (101 mg, 70%). <sup>1</sup>H NMR (400 MHz, CDCl<sub>3</sub>) δ 8.25 (d, *J* = 6.8 Hz, 2H), 8.10-8.00 (m, 2H), 7.91 (d, *J* = 7.5 Hz, 2H), 7.66 (d, *J* = 8.9 Hz, 1H), 7.60-7.45 (m, 7H). <sup>13</sup>C NMR (101 MHz, CDCl<sub>3</sub>) δ 165.92, 164.01, 147.85, 142.61, 134.86, 131.92, 131.66, 128.94, 128.82, 127.68, 127.10, 127.01, 118.70, 112.10, 110.60 (15 carbon signals were observed out of expected 16 carbon signals).

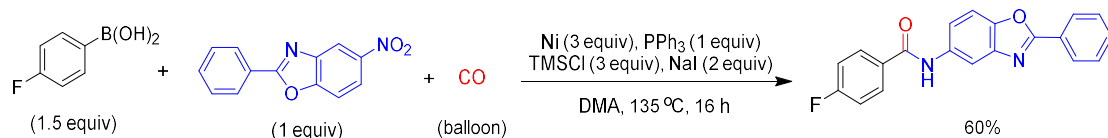

**4-Fluoro-*N*-(2-phenylbenzo[d]oxazol-5-yl)benzamide (4b).**<sup>28</sup> Following the general procedure, the title compound was prepared using 4-fluorophenylboronic acid (1.5 equiv, 0.75 mmol, 105 mg) and 5-nitro-2-phenylbenzo[d]oxazole (1.0 equiv, 0.50 mmol, 120 mg) using PE/EtOAc (5:1) as an eluent to afford the title compound as a white amorphous solid (100 mg, 60%). <sup>1</sup>H NMR (400 MHz, CDCl<sub>3</sub>) δ 8.30 – 8.22 (m, 2H), 8.02 (s, 1H), 7.98 – 7.86 (m, 3H), 7.64 (d, *J* = 8.9 Hz, 1H), 7.60-7.50 (m, 4H), 7.20 (t, *J* = 8.3 Hz, 2H). <sup>13</sup>C NMR (101 MHz, DMSO-*d*<sub>6</sub>) δ 164.54, 164.11 (d, *J*<sub>C-F</sub> = 247.6 Hz), 162.98, 146.70, 141.62, 136.28, 132.02, 131.33 (d, *J*<sub>C-F</sub> = 2.9 Hz), 130.44 (d, *J*<sub>C-F</sub> = 9.0 Hz), 129.37, 127.28, 126.42, 118.88, 115.41 (d, *J*<sub>C-F</sub> = 21.6 Hz), 111.35, 110.67.

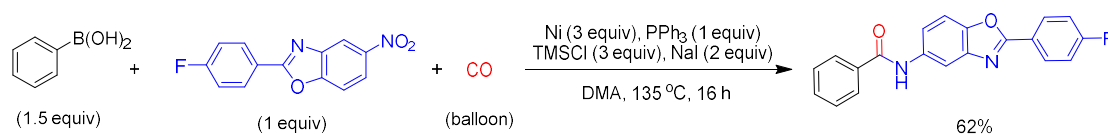

***N*-(2-(4-Fluorophenyl)benzo[d]oxazol-5-yl)benzamide (4c).**<sup>29</sup> Following the general procedure, the title compound was prepared using phenylboronic acid (1.5 equiv, 0.75 mmol, 92 mg) and 2-(4-fluorophenyl)-5-nitrobenzo[d]oxazole (1.0 equiv, 0.50 mmol, 129 mg) using PE/EtOAc (5:1) as an eluent to afford the title compound as a white amorphous solid (103 mg, 62%). **<sup>1</sup>H NMR** (400 MHz, CDCl<sub>3</sub>)  $\delta$  8.26 (dd,  $J$  = 8.2,  $J$  = 5.1 Hz, 2H), 8.05 (s, 1H), 7.96-7.88 (m, 3H), 7.66 (d,  $J$  = 8.8 Hz, 1H), 7.62 – 7.48 (m, 4H), 7.22 (t,  $J$  = 8.7 Hz, 2H). **<sup>13</sup>C NMR** (101 MHz, CDCl<sub>3</sub>)  $\delta$  165.97, 165.02 (d,  $J_{\text{C-F}}$  = 251.5 Hz), 163.30, 147.99, 142.76, 135.05, 124.99, 132.12, 130.06 (d,  $J_{\text{C-F}}$  = 8.8 Hz), 129.01, 127.20, 123.49 (d,  $J_{\text{C-F}}$  = 3.0 Hz), 118.74, 116.38 (d,  $J_{\text{C-F}}$  = 22.1 Hz), 112.13, 110.75.

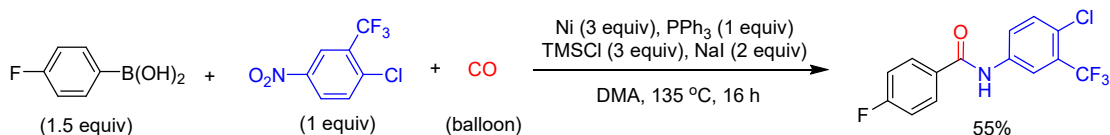

***N*-(4-Chloro-3-(trifluoromethyl)phenyl)-4-fluorobenzamide (4d).**<sup>30</sup> Following the general procedure, the title compound was prepared using 4-fluorophenylboronic acid (1.5 equiv, 0.75 mmol, 105 mg) and 2-chloro-5-nitrobenzotrifluoride (1.0 equiv, 0.50 mmol, 113 mg) using PE/EtOAc (6:1) as an eluent to afford the title compound as a white amorphous solid (87 mg, 55%). **<sup>1</sup>H NMR** (400 MHz, DMSO-*d*<sub>6</sub>)  $\delta$  10.63 (s, 1H), 8.34 (s, 1H), 8.11-8.00 (m, 3H), 7.70 (d,  $J$  = 8.7 Hz, 1H), 7.39 (t,  $J$  = 8.4 Hz, 2H). **<sup>13</sup>C NMR** (101 MHz, DMSO-*d*<sub>6</sub>)  $\delta$  164.9, 164.3 (d,  $J_{\text{C-F}}$  = 248.4 Hz), 138.6, 132.0, 130.63, 130.60 (d,  $J_{\text{C-F}}$  = 9.2 Hz), 126.7 (q,  $J_{\text{C-F}}$  = 30.6 Hz), 125.0, 124.4 (d,  $J_{\text{C-F}}$  = 1.7 Hz), 122.8 (q,  $J_{\text{C-F}}$  = 271.4 Hz), 119.0 (q,  $J_{\text{C-F}}$  = 5.7 Hz), 115.5 (d,  $J_{\text{C-F}}$  = 21.8 Hz).



## References

- (1) G. R. Fulmer, A. J. M. Miller, N. H. Sherden, H. E. Gottlieb, A. Nudelman, B. M. Stoltz, J. E. Bercaw and K. I. Goldberg, *Organometallics*, 2010, **29**, 2176.
- (2) K. W. Bair, T. R. Baumeister, P. Dragovich, M. Zak, G. Zhao and X. Zheng (Genentech, Inc., USA; Forma TM, LLC.), US Patent 2014074715, May 15, 2014.
- (3) M. E. Lanning, W. Yu, J. L. Yap, J. Chauhan, L. Chen, E. Whiting, L. S. Pidugu, T. Atkinson, H. Bailey, W. Li, B. M. Roth, L. Hynicka, K. Chesko, E. A. Toth, P. Shapiro, A. D. MacKerell Jr., P. T. Wilder and S. Fletcher, *Eur. J. Med. Chem.*, 2016, **113**, 273.
- (4) C. W. Cheung, J.-A. Ma and X. Hu, *J. Am. Chem. Soc.*, 2018, **140**, 6789.
- (5) A. Selen Gurkan, A. Karabay, Z. Buyukbingol, A. Adejare and E. Buyukbingol, *Archiv der Pharmazie*, 2005, **338**, 67.
- (6) Y. Kawashita, N. Nakamichi, H. Kawabata and M. Hayashi, *Org. Lett.*, 2003, **5**, 3713.
- (7) Z. Zhao, Z. Peng, Y. Zhao, H. Liu, C. Li and J. Zhao, *J. Org. Chem.*, 2017, **82**, 11848.
- (8) J. Zhang, Y. Ma and Y. Ma, *Eur. J. Org. Chem.*, 2018, 1720.
- (9) X.-Y. Shi, K.-Y. Liu, J. Fan, X.-F. Dong, J.-F. Wei and C.-J. Li, *Chem. Eur. J.*, 2015, **21**, 1900.
- (10) M. Kissane, D. Lynch, J. Chopra, S. E. Lawrence and A. R. Maguire, *Org. Biomol. Chem.*, 2010, **8**, 5602.
- (11) P. Sharma and N. Jain, *Adv. Synth. Catal.*, 2018, **360**, 1932.
- (12) S. Karthik, K. Muthuvel and T. Gandhi, *J. Org. Chem.*, 2019, **84**, 738.
- (13) H. Berneth, (Bayer A.-G.) *Fed. Rep. Ger.* 1986, DE 3500361 A1 19860710.
- (14) A. H. Dardir, P. R. Melvin, R. M. Davis, N. Hazari and M. Mohadjer Beromi, *J. Org. Chem.*, 2018, **83**, 469.
- (15) J. Zhang, Y. Hou, Y. Ma and M. Szostak, *J. Org. Chem.*, 2019, **84**, 338.
- (16) K. L. Wilson, J. Murray, C. Jamieson and A. J. B. Watson, *Org. Biomol. Chem.*, 2018, **16**, 2851.

- (17) S. A. Rzhavskiy, A. A. Ageshina, G. A. Chesnokov, P. S. Griбанov, M. A. Topchiy, M. S. Nechaev and A F. Asachenko, *RSC Adv.*, 2019, **9**, 1536.
- (18) A. Baruffini and F. Gialdi, *Farmaco, Edizione Scientifica*, 1958, **13**, 911.
- (19) B. Vinayak and M. Chandrasekharam, *Org. Lett.*, 2017, **19**, 3528.
- (20) S. De, J. Yin and D. Ma, *Org. Lett.*, 2017, **19**, 4864.
- (21) L. Schulz, M. Enders, B. Elsler, D. Schollmeyer, K. M. Dybala, R. Franke and S. R. Waldvogel, *Angew. Chem. Int. Ed.*, 2017, **56**, 4877.
- (22) V. Z. Rodrigues, M. Tokarcik, B. T. Gowda and J. Kozisek, *Acta Crystallogr. E.*, 2010, **66**, o1116.
- (23) P. Sharma and N. Jain, *Adv. Synth. Catal.*, 2018, **360**, 1932.
- (24) K. Waisser, J. Kunes, Z. Odleroa, M. Roman, L. Kubicova and V. Horak, *Die Pharmazie*, 1998, **53**, 193.
- (25) E. Racine, F. Monnier, J.-P. Vors, J.-P. and M. Taillefer, *Chem. Commun.*, 2013, **49**, 7412.
- (26) D. Chopra and T. N. G. Row, *CrystEngComm*, 2008, **10**, 54.
- (27) E. K. Woodman, J. G. K. Chaffey, P. A. Hopes D. R. J. Hose and J. P. Gilday, *Org. Process Res. Dev.*, 2009, **13**, 106.
- (28) E. A. Sener, O. T. Arpacı, I. Yalcin and N. Altanlar, *Il Farmaco*, 2000, **55**, 397.
- (29) O. T. Arpacı, I. Oren and N. Altanlar, *Il Farmaco*, 2002, **57**, 175.
- (30) M. G. Vigorita, G. Saporito, G. T. Previtera, F. C. Pizzimenti and G. Bisignano, *Farmaco Sci.*, 1986, **41**, 168.

# NMR Spectra

## <sup>1</sup>H and <sup>13</sup>C NMR Spectra of 4-Methyl-N-*p*-tolylbenzamide (3a)

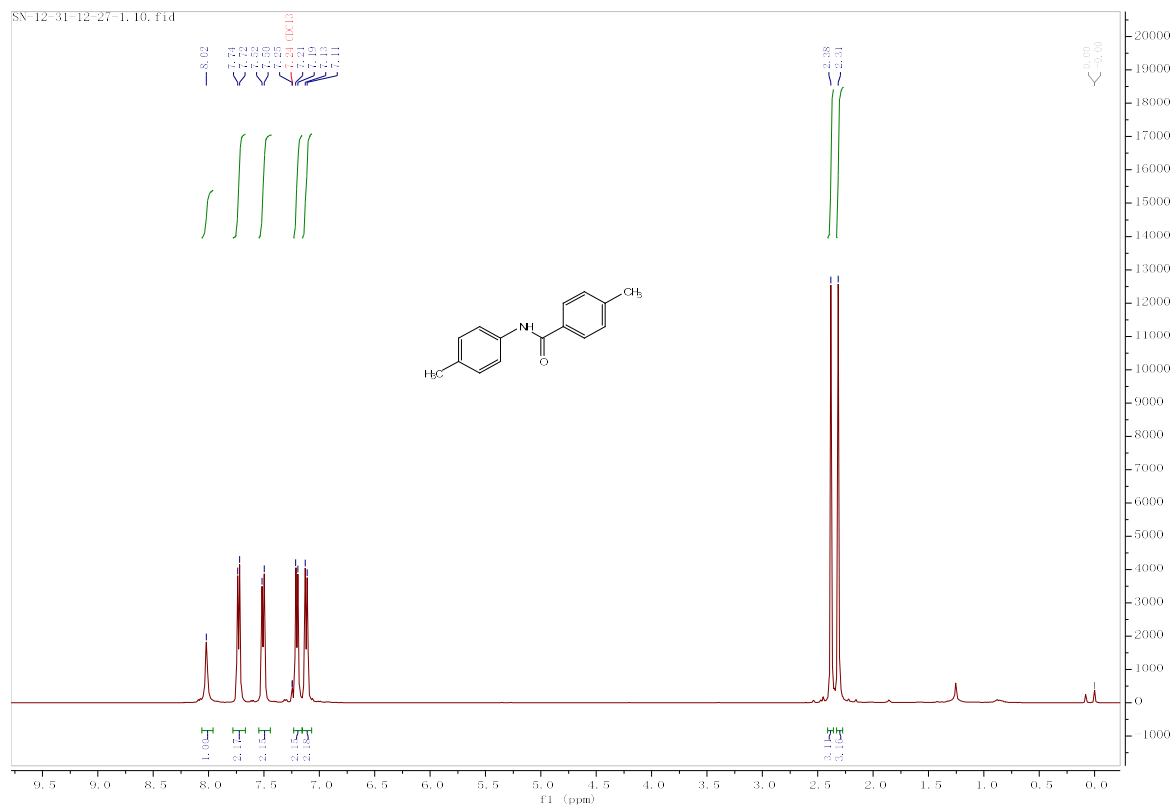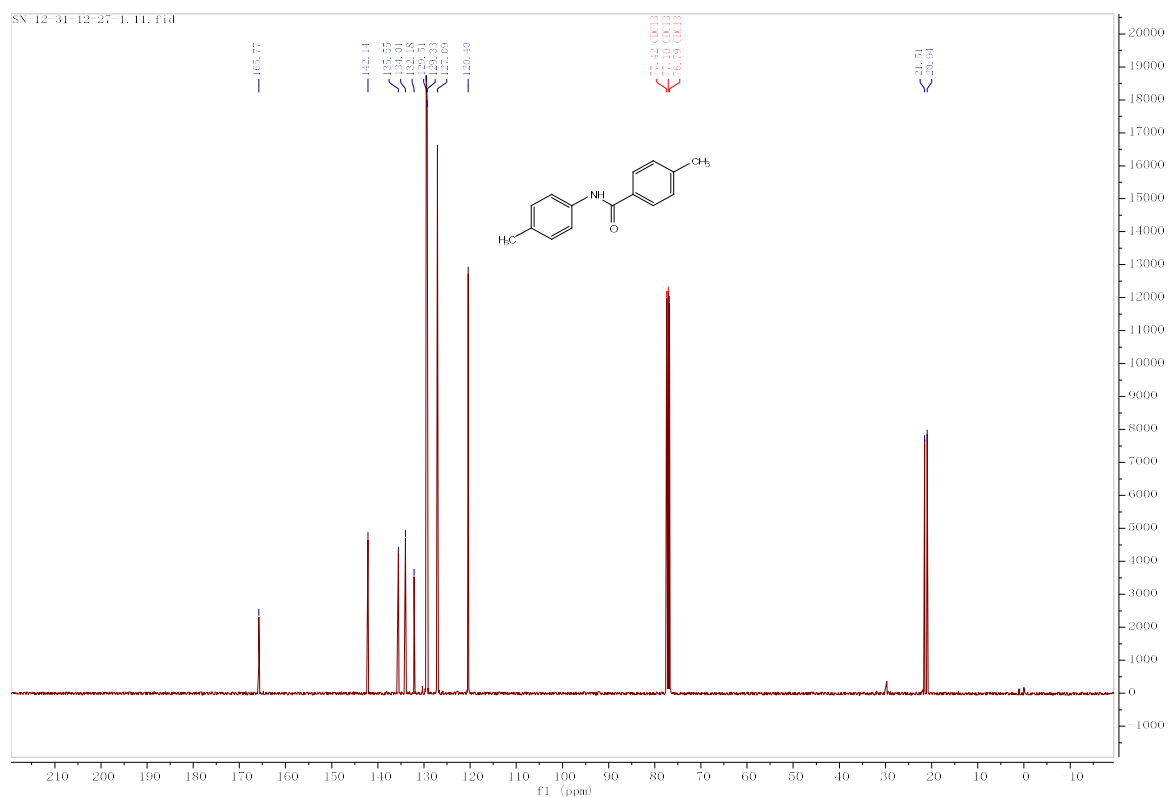

SN-12-04-10-7-1, 10, fid

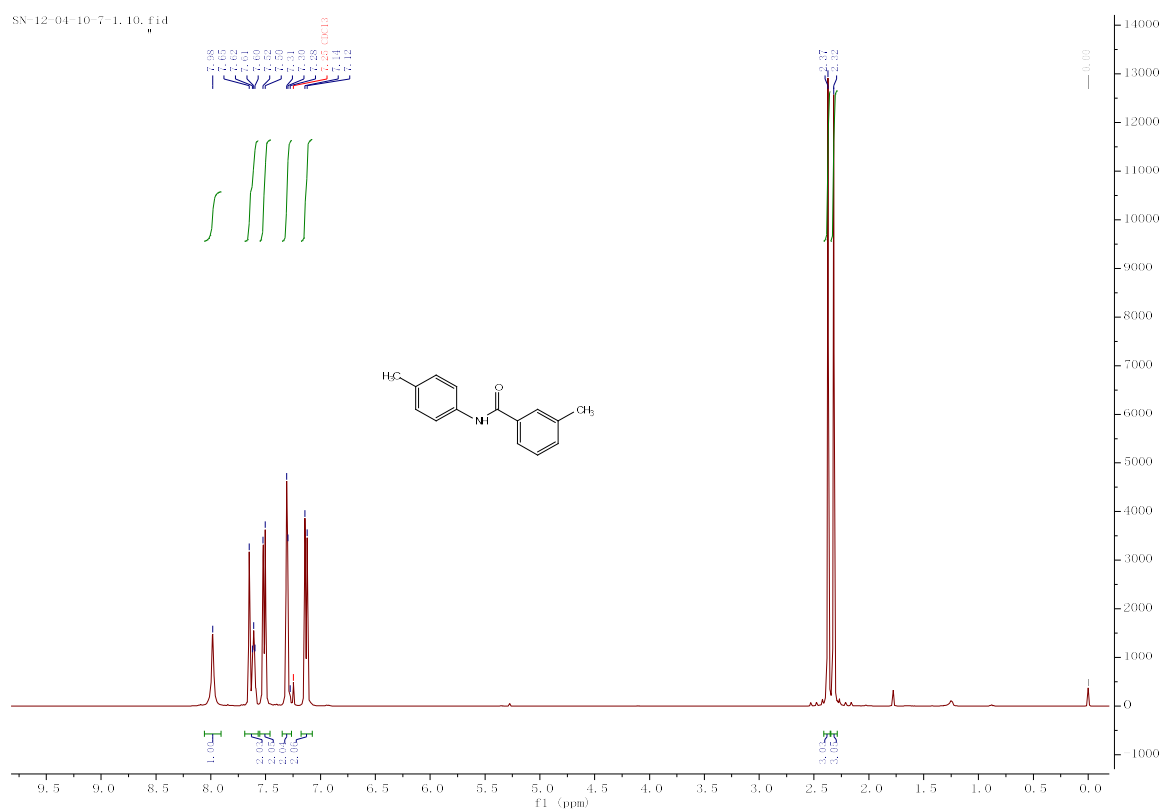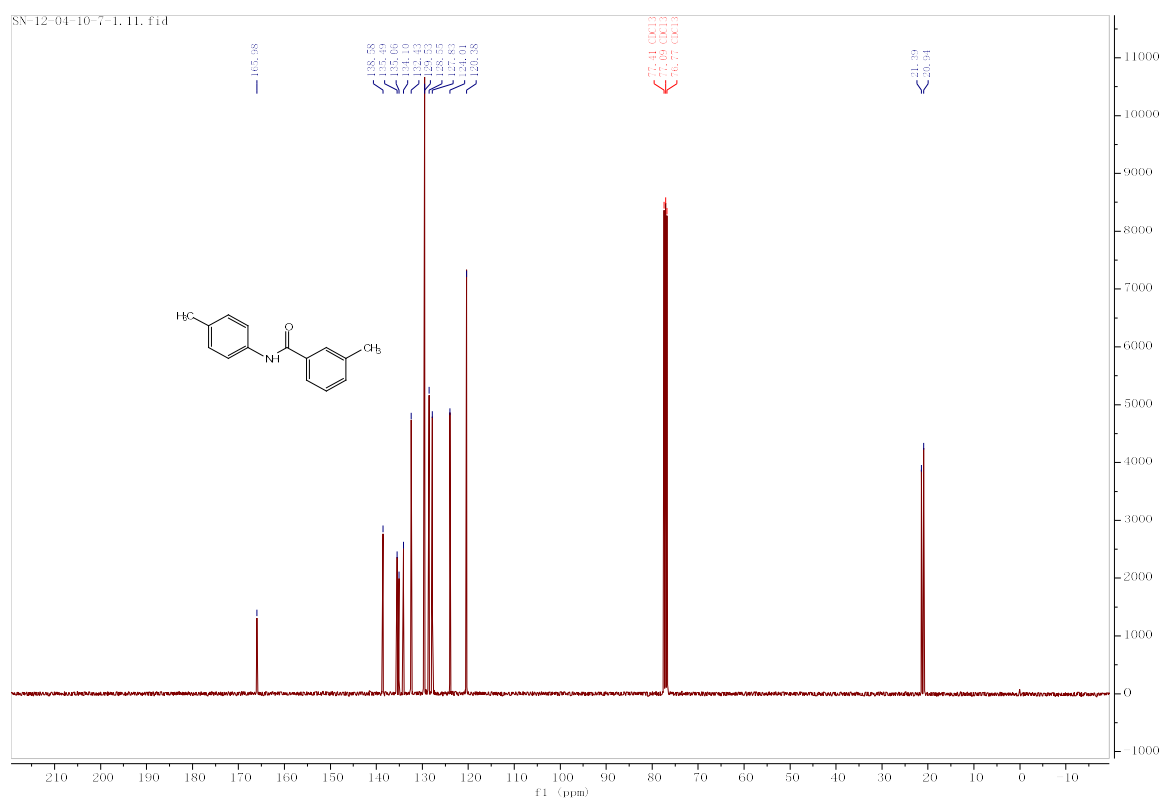

## SN-11-16-10-14-3, 10, fid

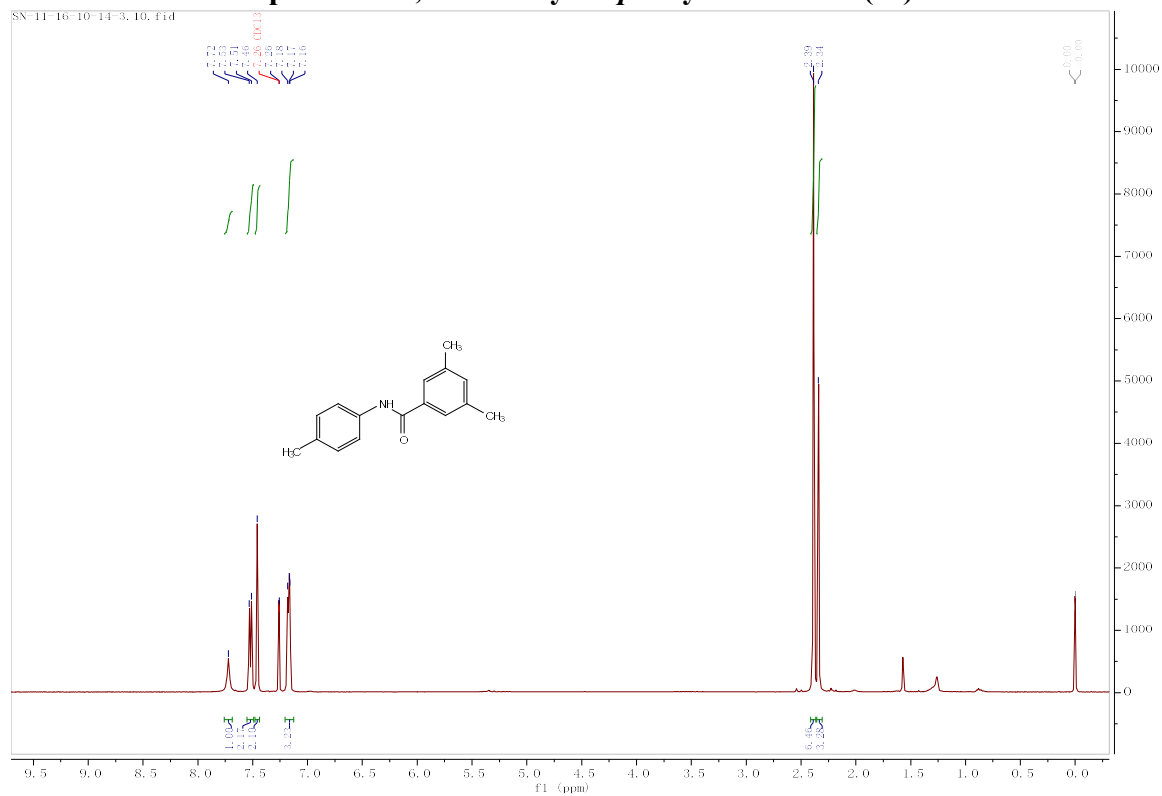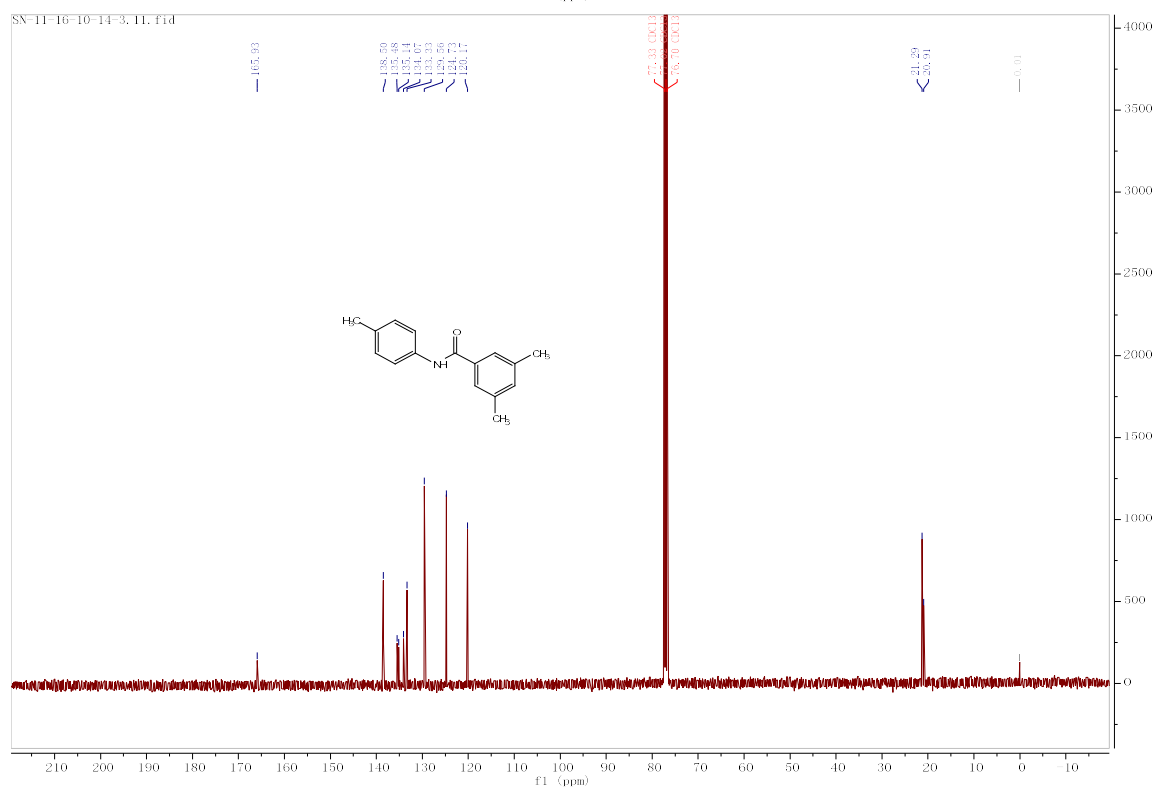

# <sup>1</sup>H and <sup>13</sup>C NMR Spectra of 3,4-Dimethyl-*N*-*p*-tolylbenzamide (3d)

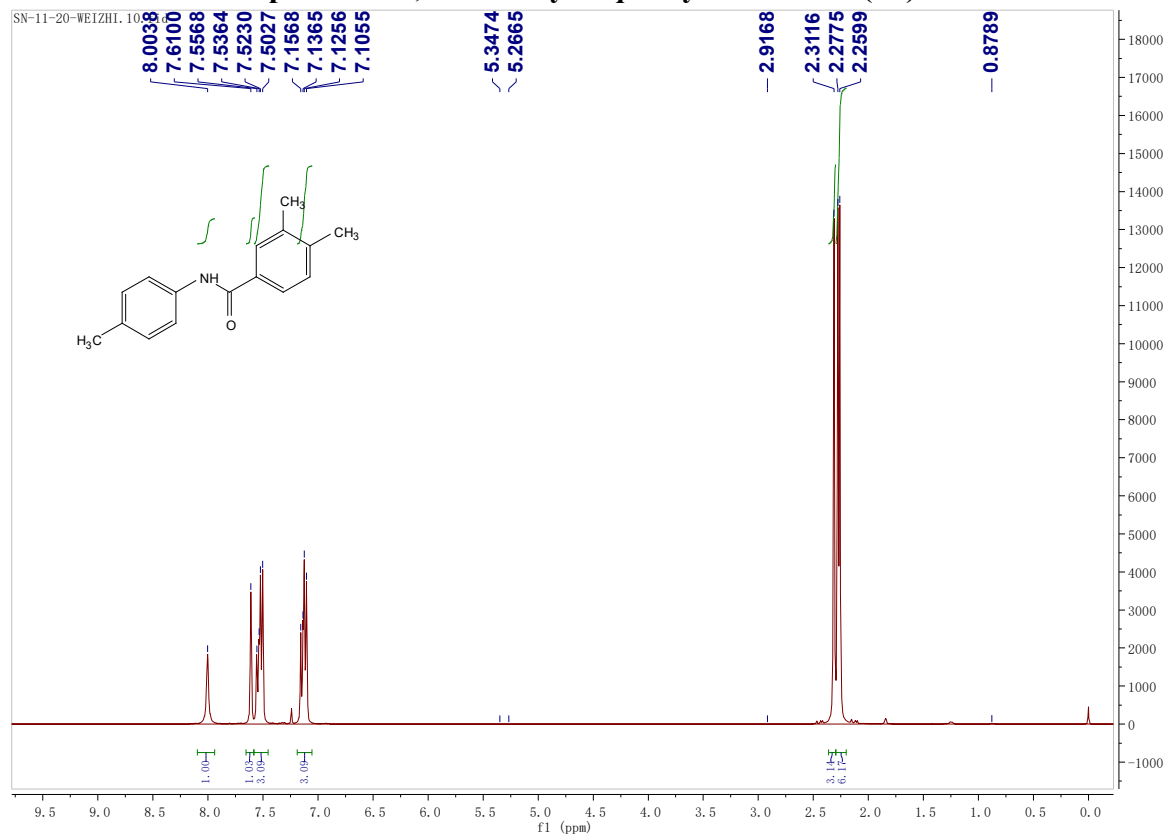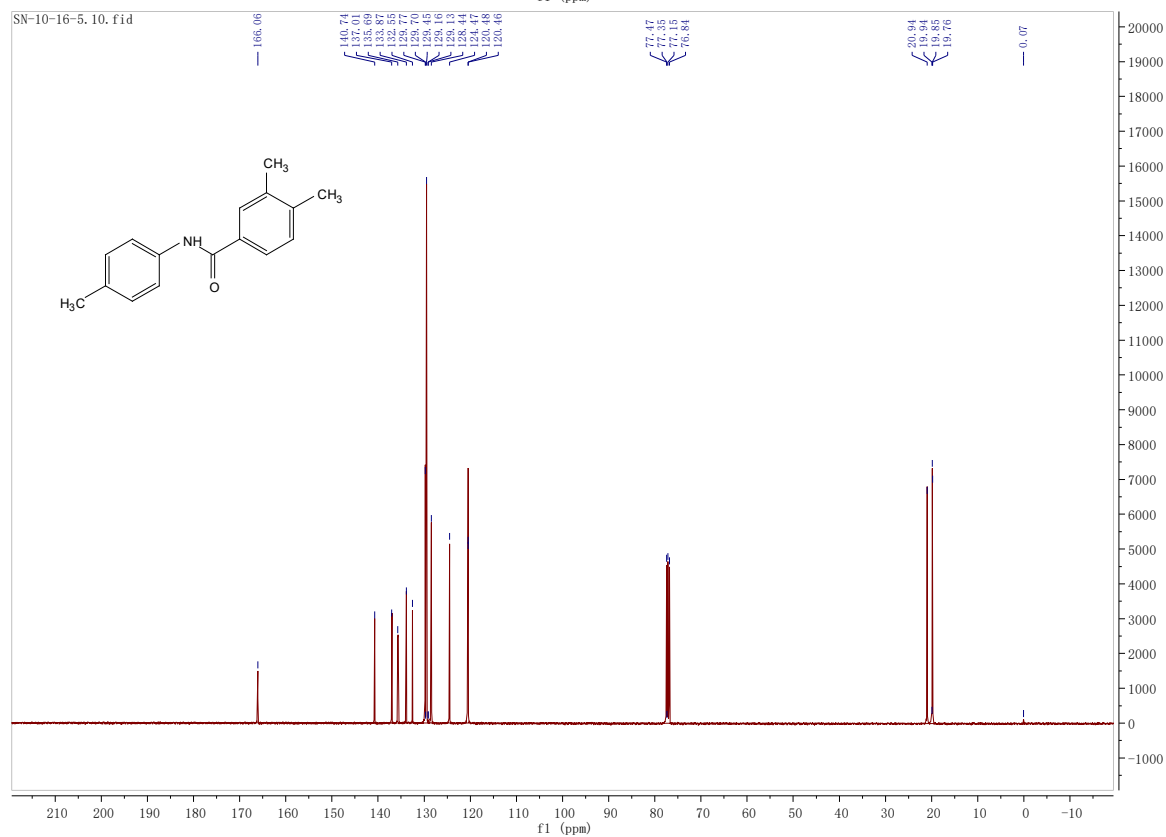

# <sup>1</sup>H and <sup>13</sup>C NMR Spectra of 2,5-Dimethyl-*N*-*p*-tolylbenzamide (3e)

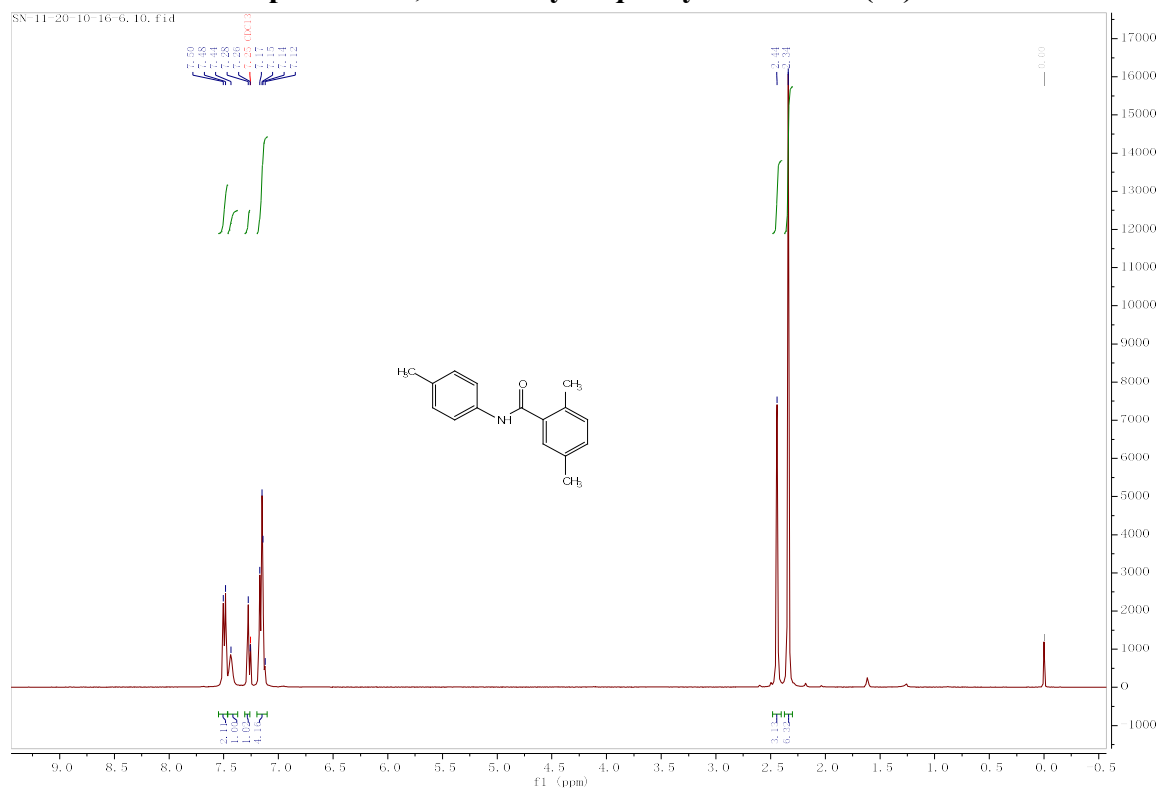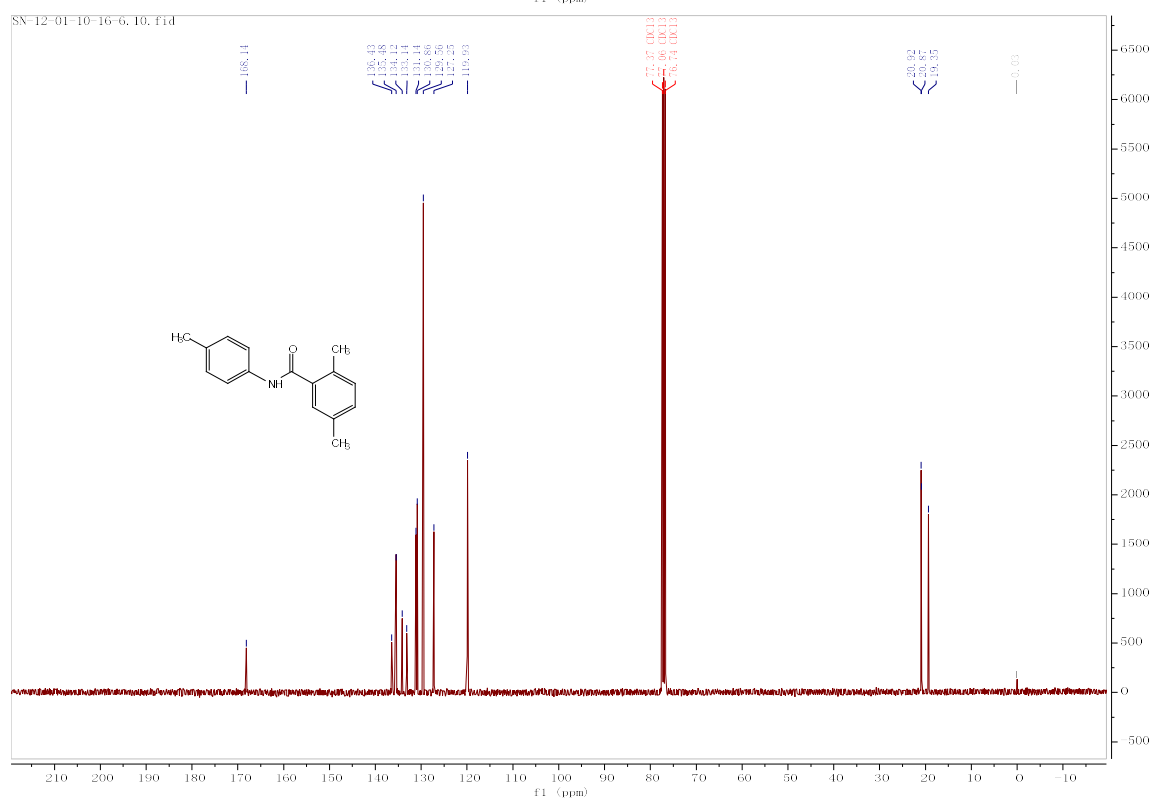

SN-11-20-11-1-2, 10, fid

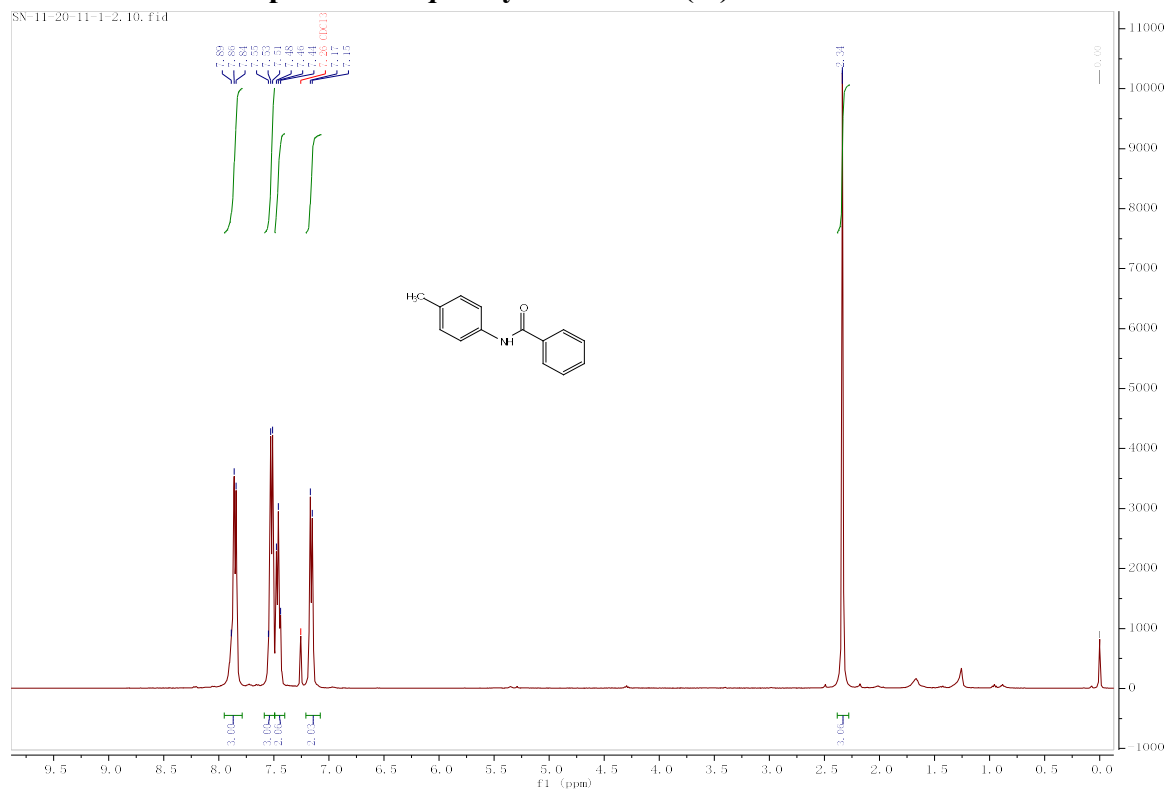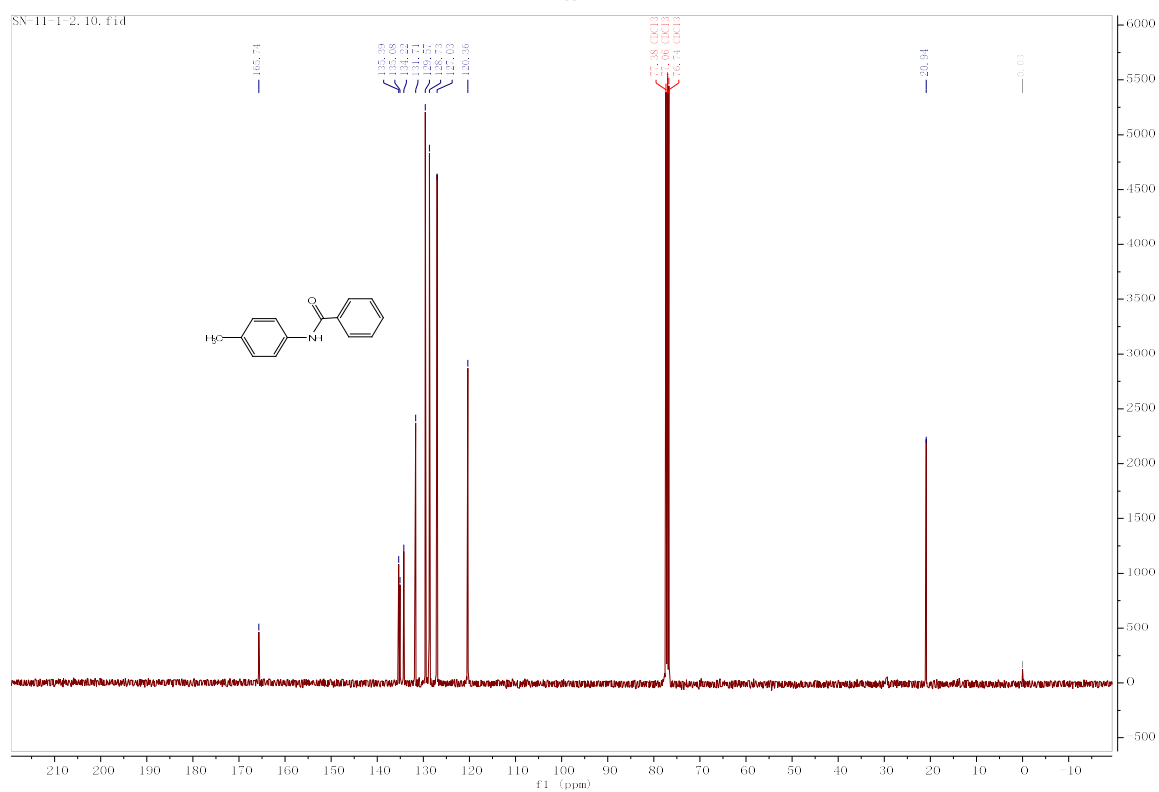



SN-12-04-11-21-1, 10, fid

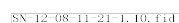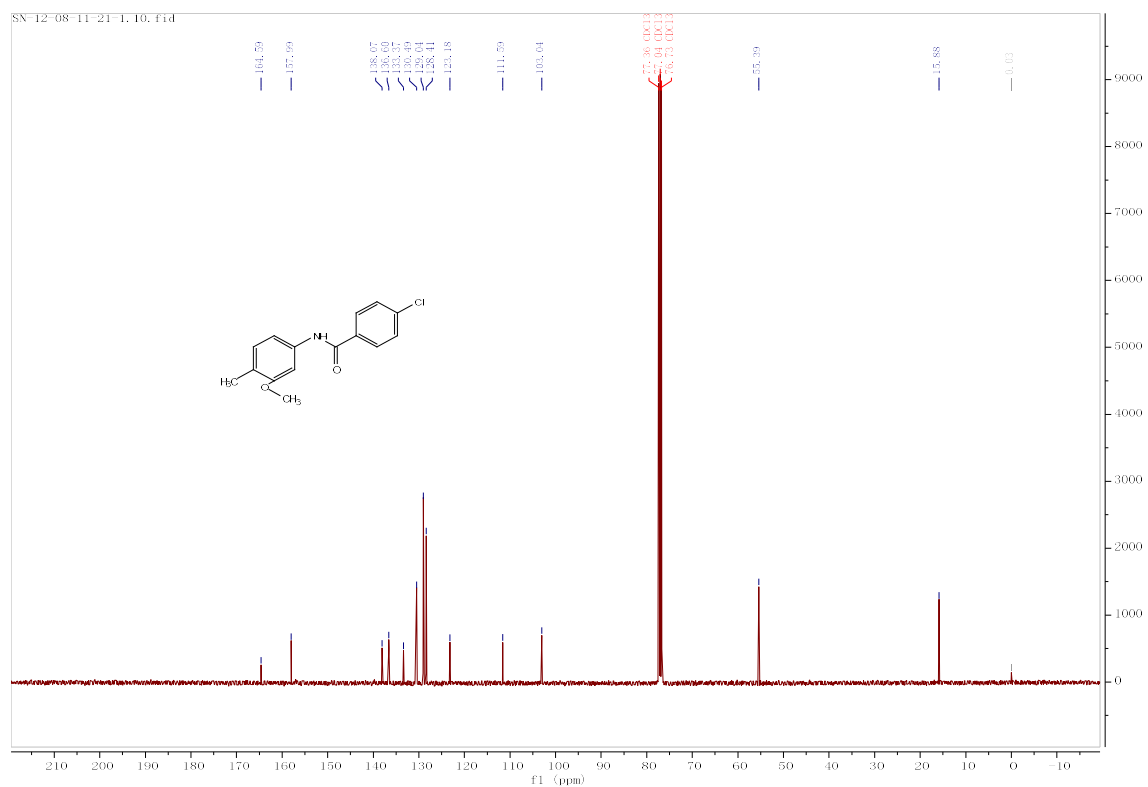

# <sup>1</sup>H and <sup>13</sup>C NMR Spectra of 4-Fluoro-*N*-(4-methoxyphenyl)benzamide (3h)

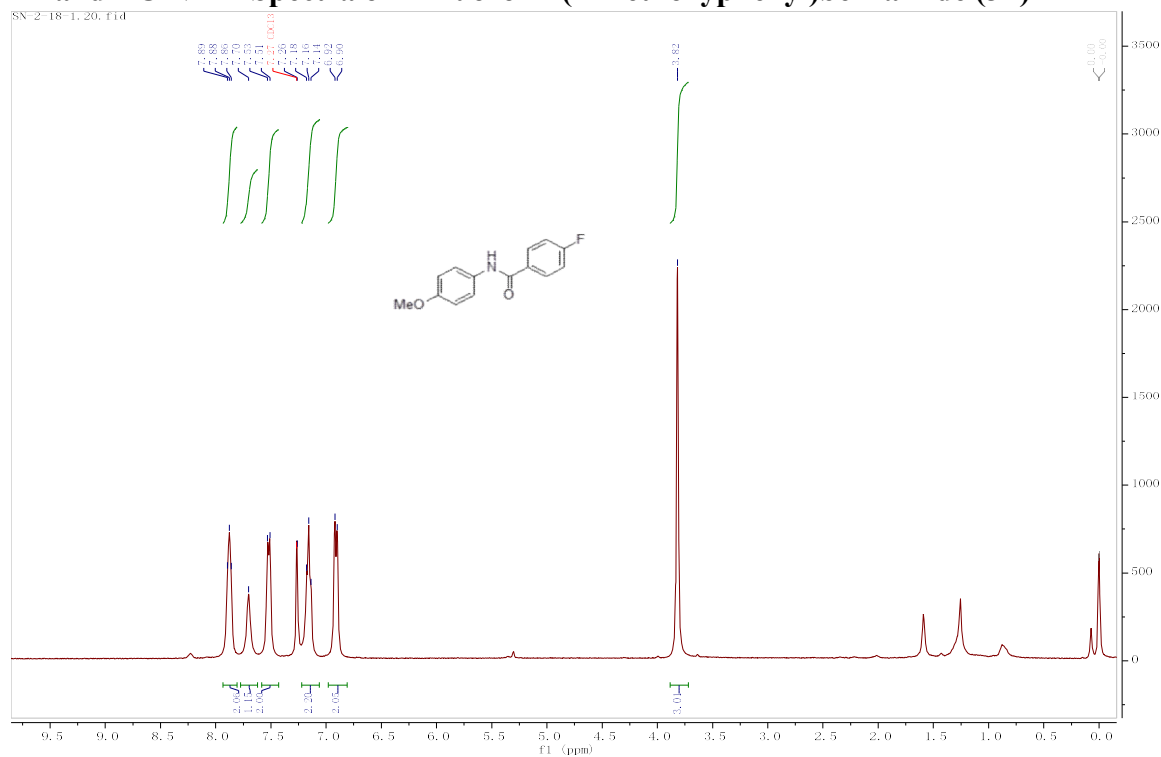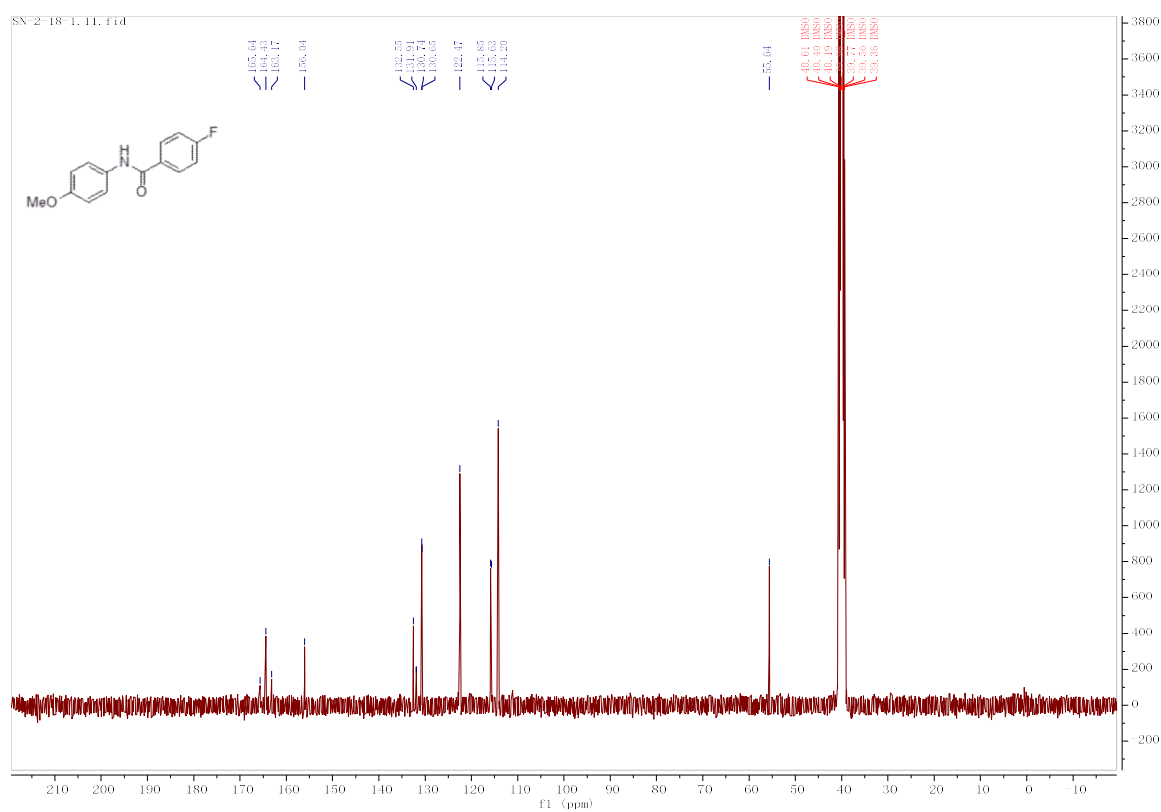

# <sup>1</sup>H and <sup>13</sup>C NMR Spectra of 4-Methyl-N-phenylbenzamide (3i)

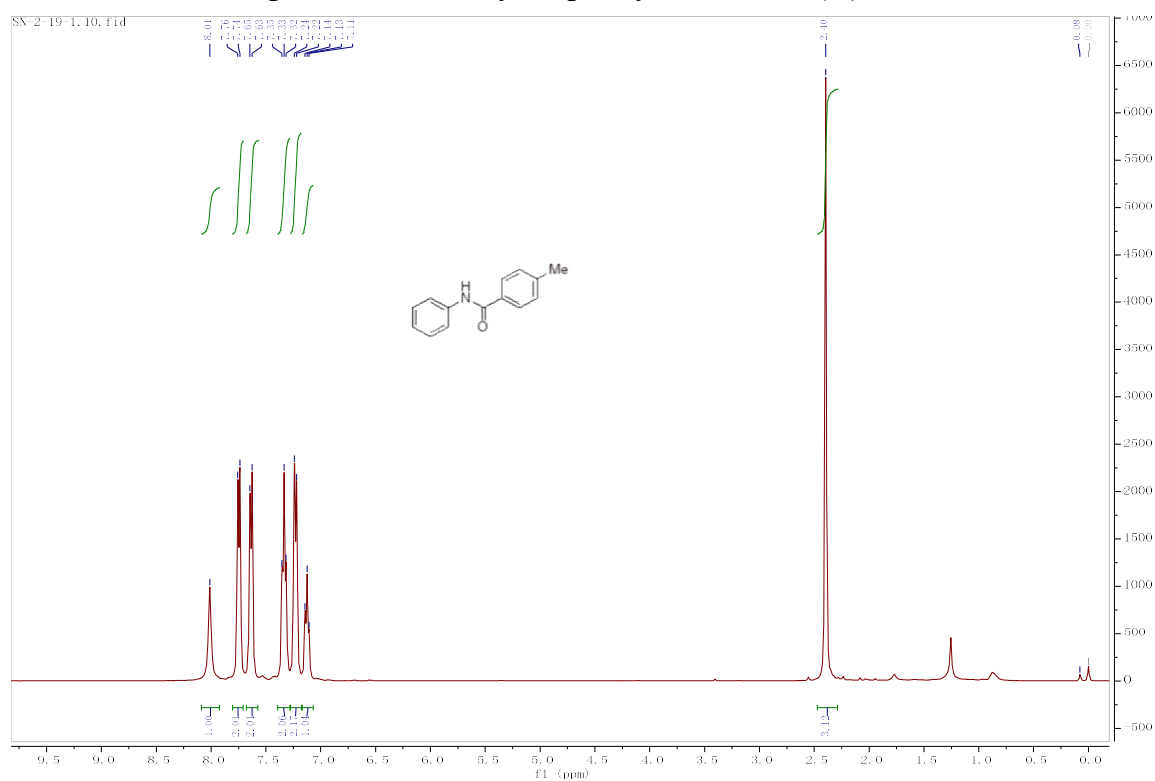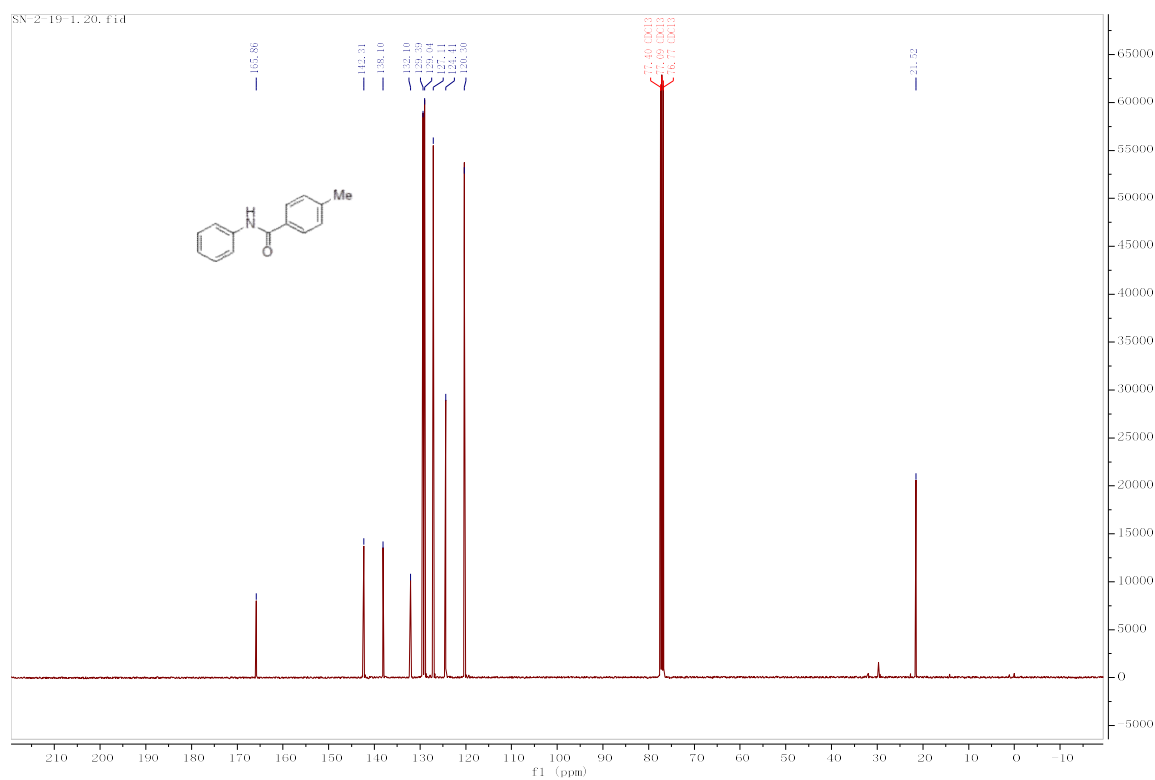

## SN-2-18-3, 10, fid

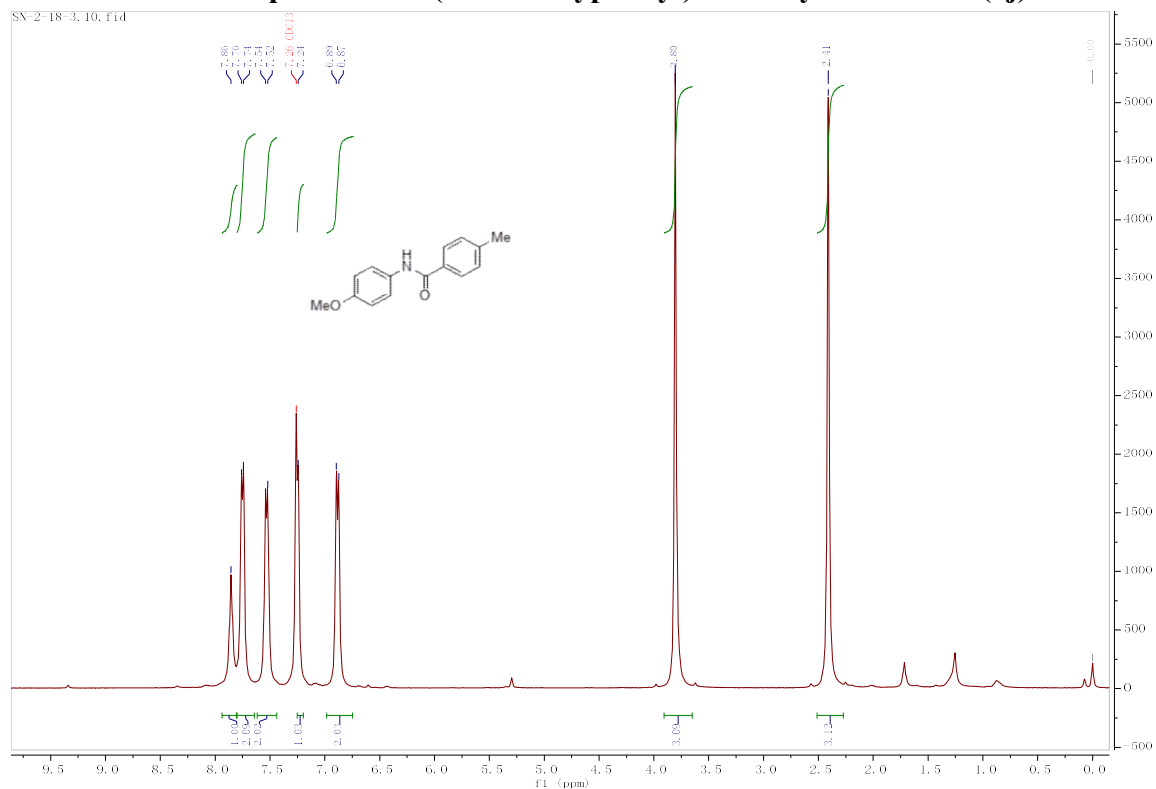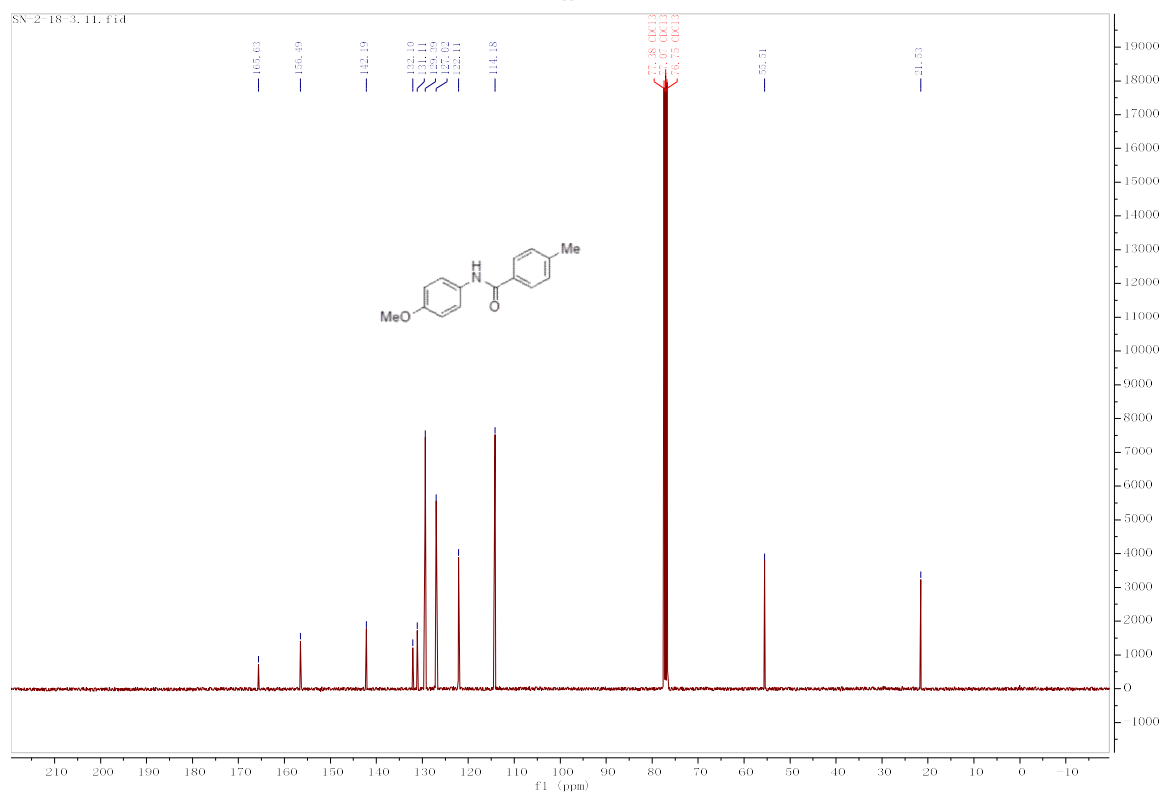

## SN-12-06-10-23-1, 10, fid

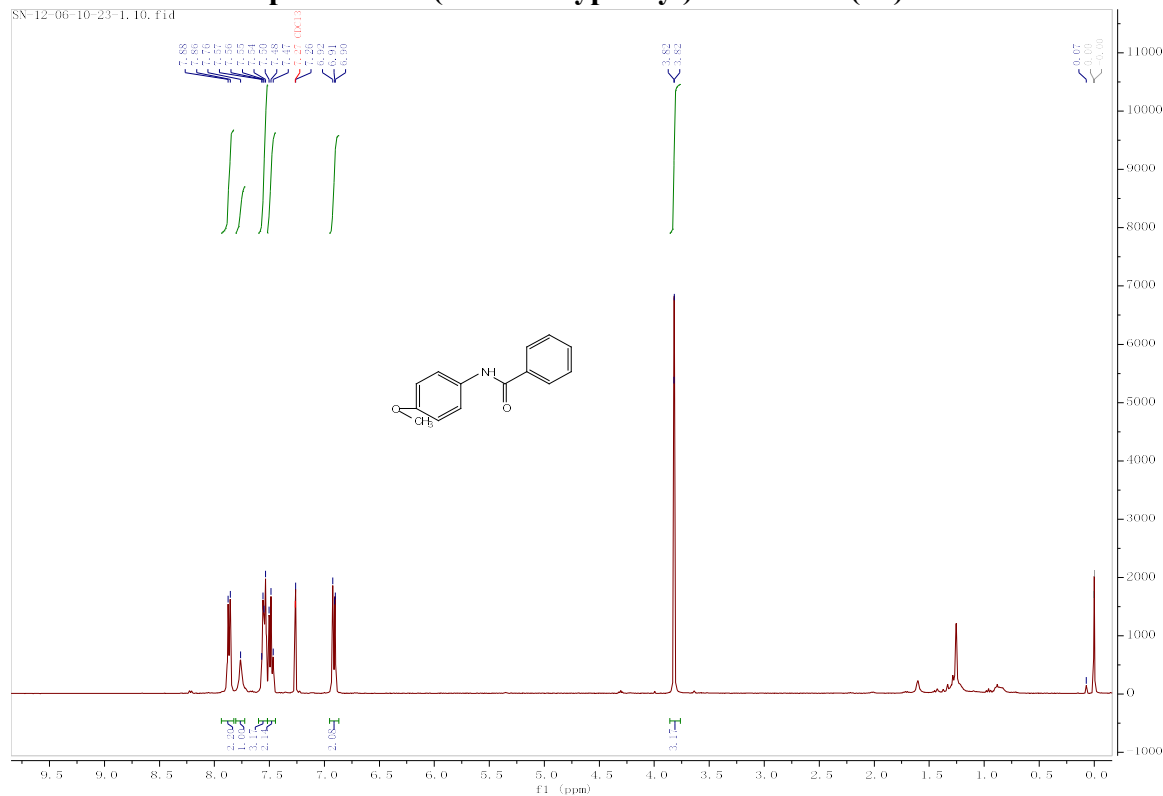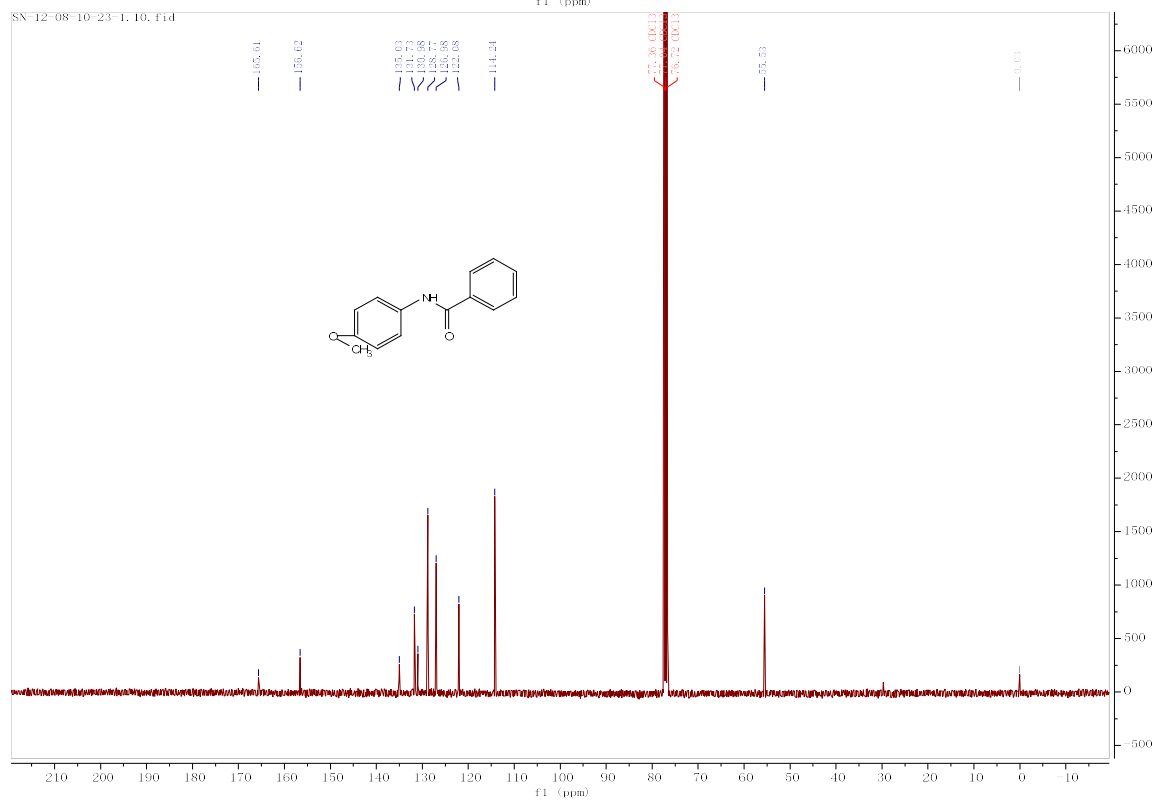

# <sup>1</sup>H and <sup>13</sup>C NMR Spectra of *N*-(4-(*p*-Tolyloxy)phenyl)-4-methylbenzamide (31)

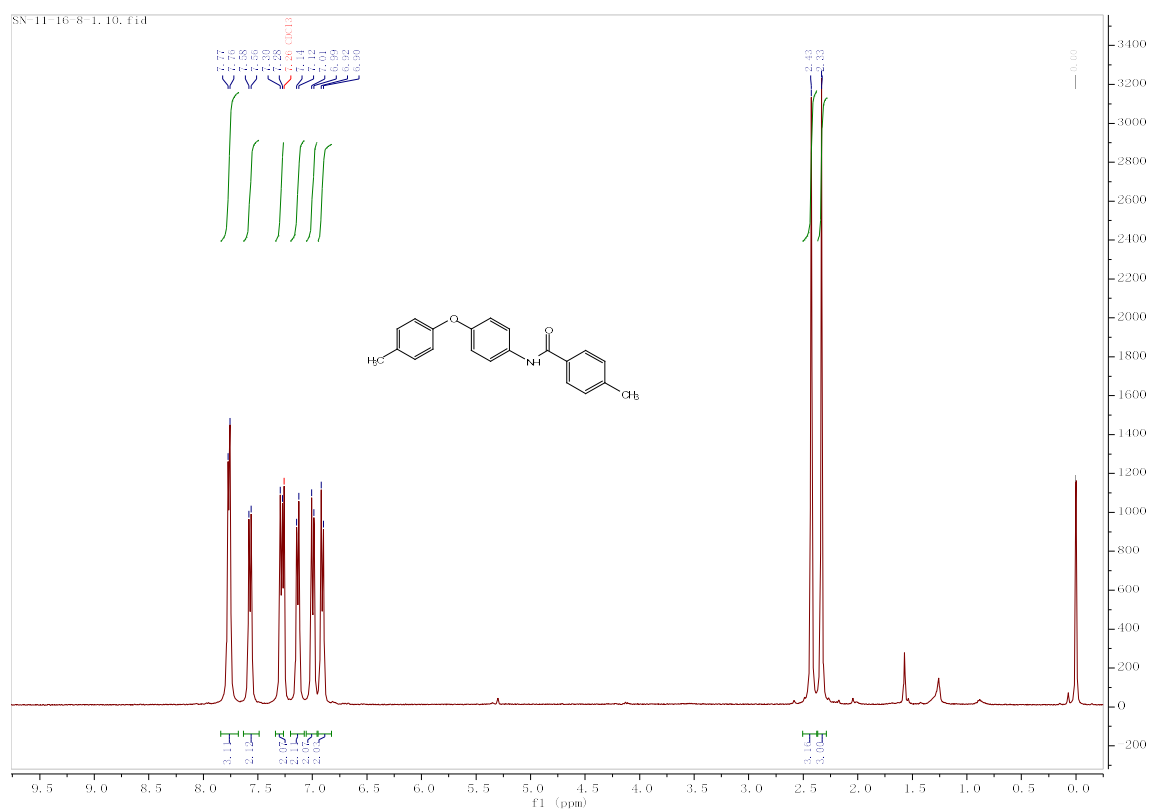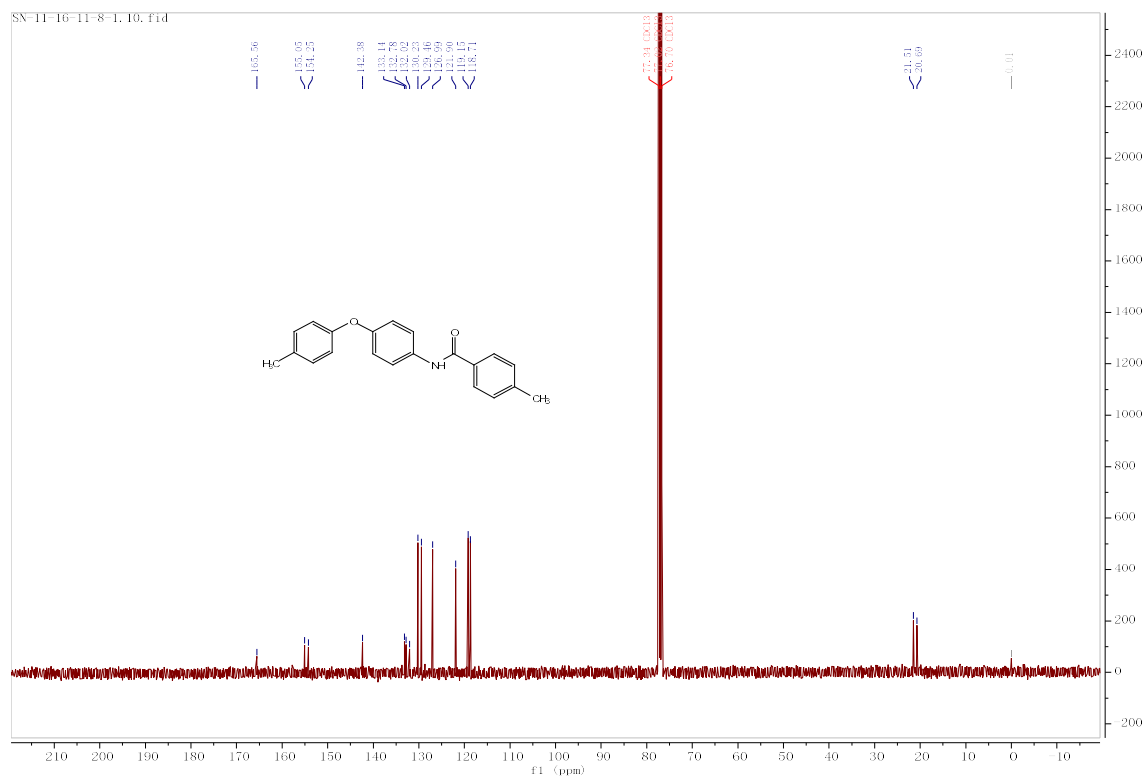

# <sup>1</sup>H and <sup>13</sup>C NMR Spectra of *N*-(4-(*p*-Tolyloxy)phenyl)benzamide (3m)

SN-12-06-11-21-3, 10, F1d

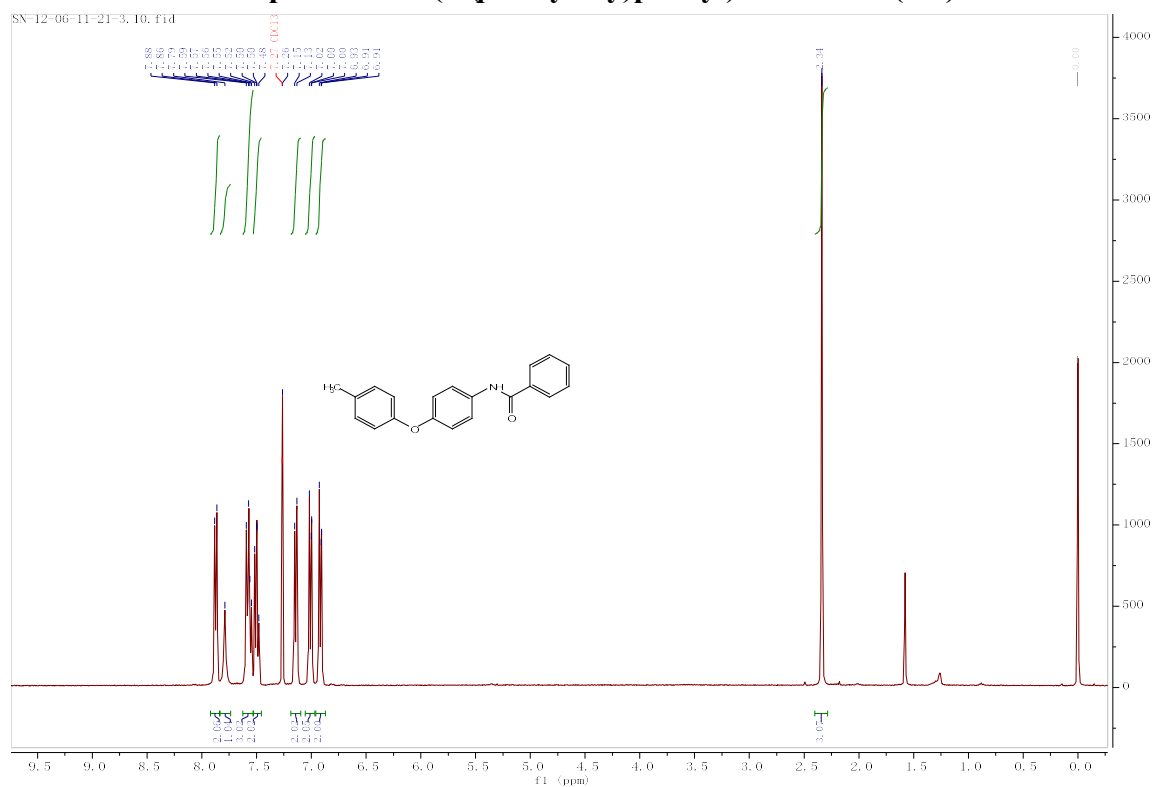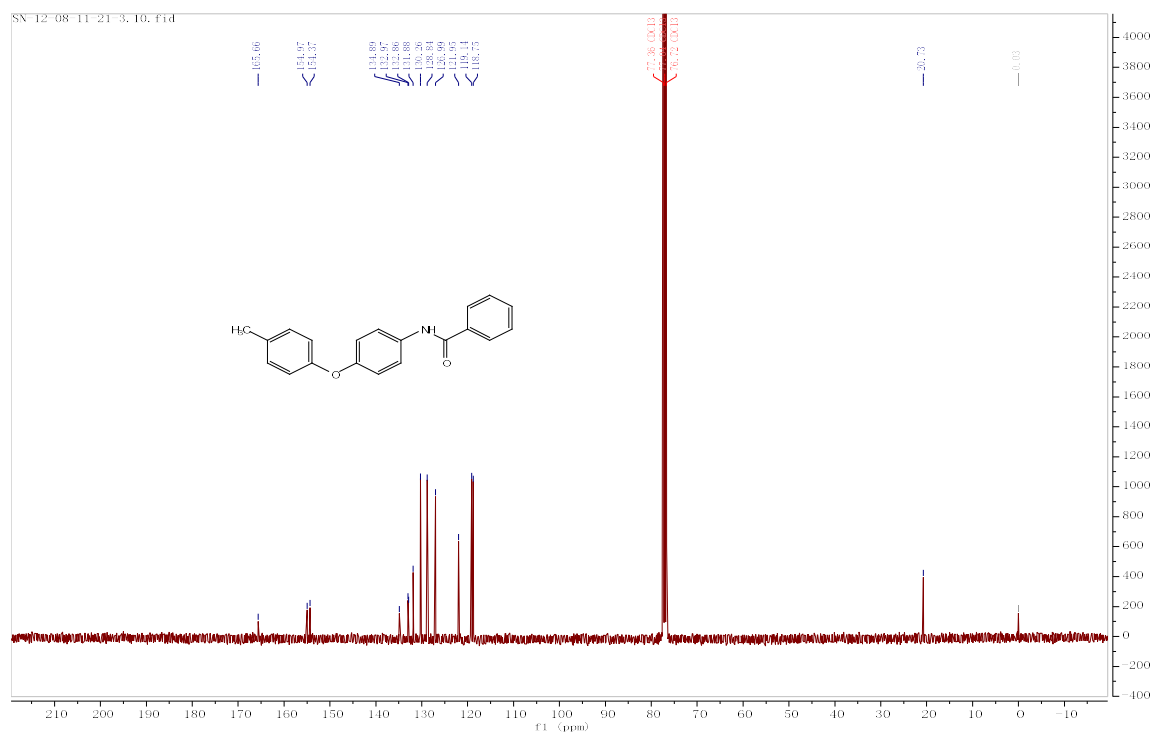

# **<sup>1</sup>H and <sup>13</sup>C NMR Spectra of *N*-(4-(Phenylthio)phenyl)benzamide (3n)**

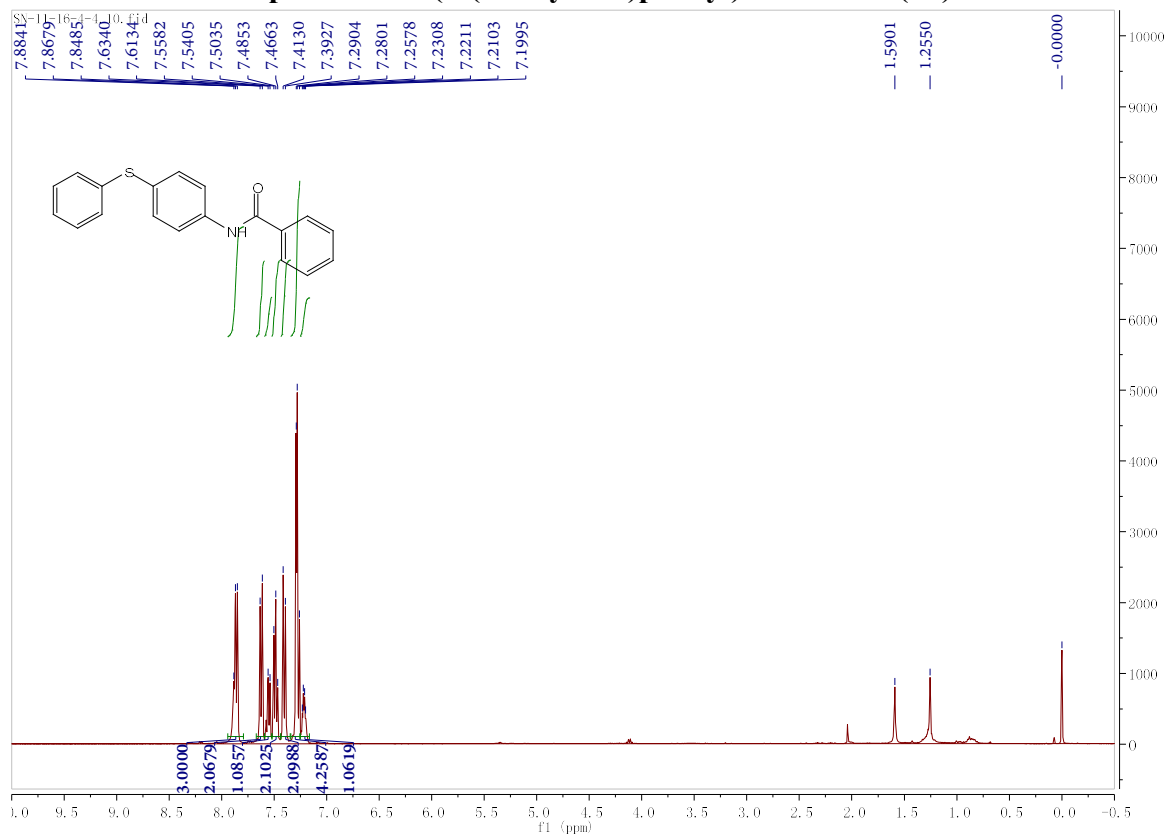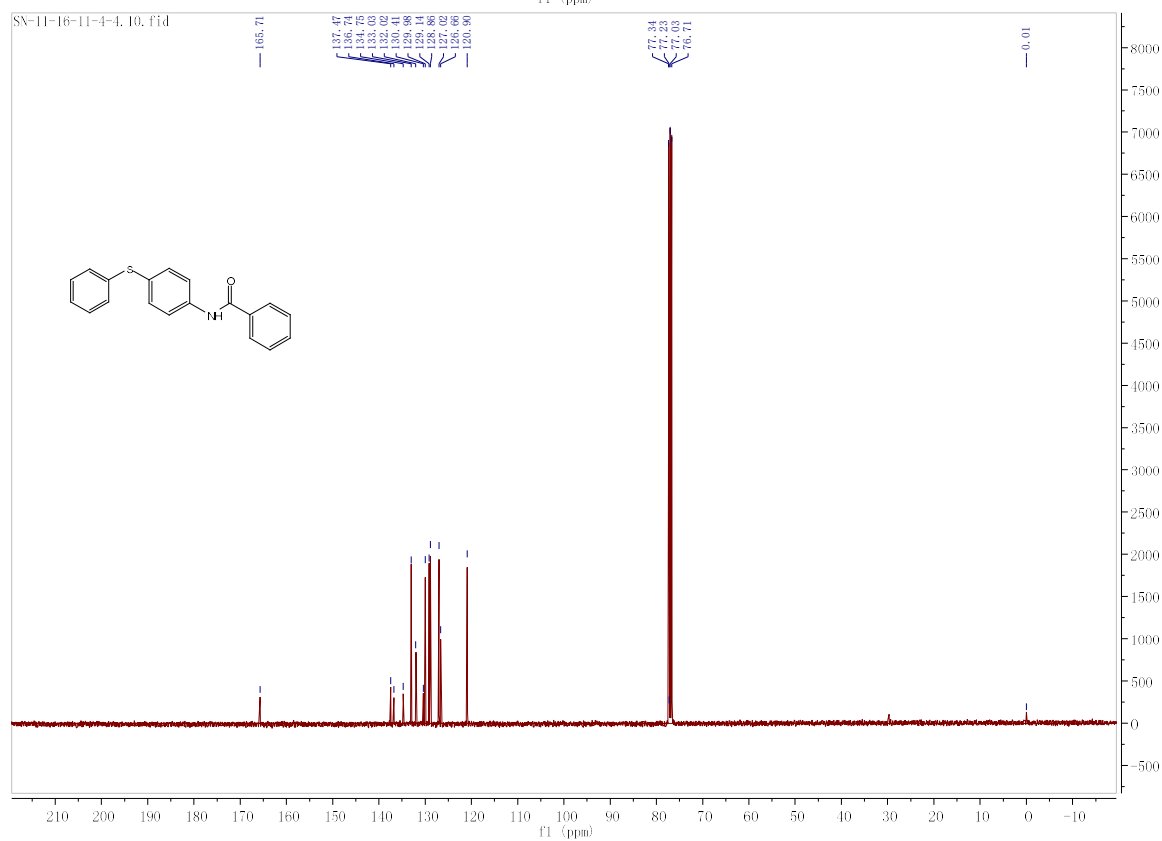



## SN-12-26-12-23-1.10. fid

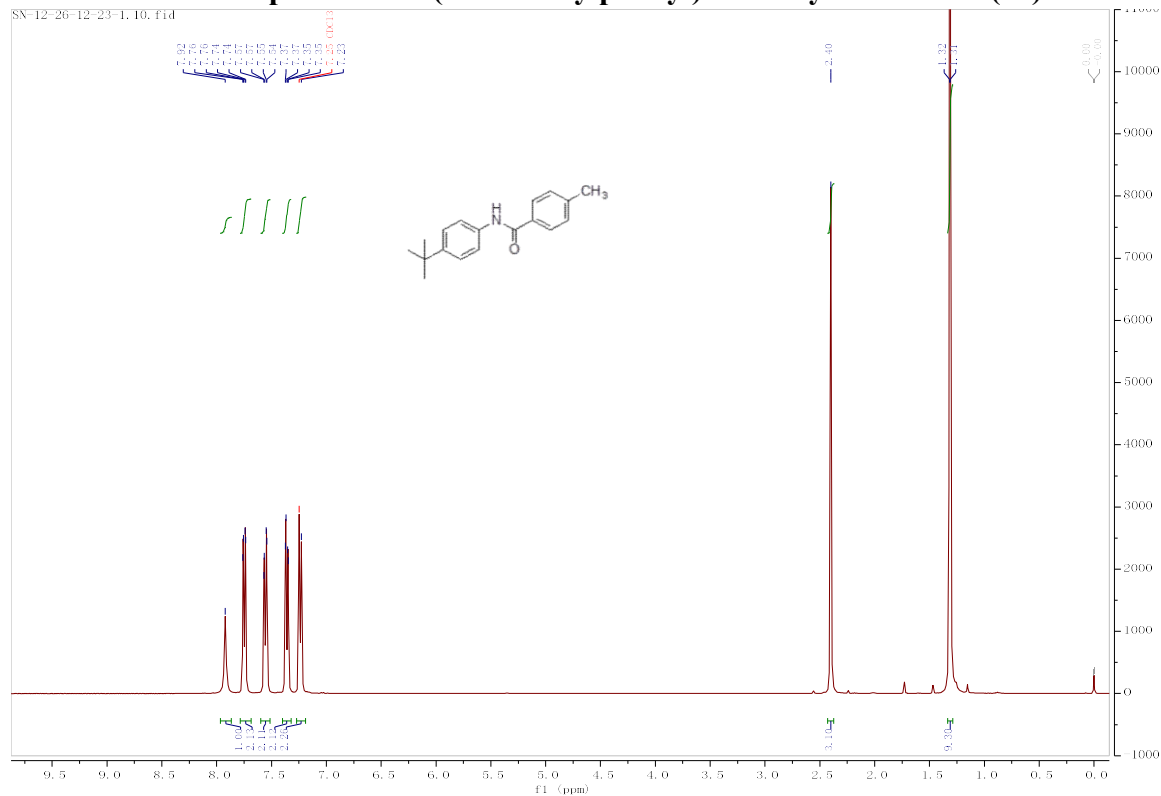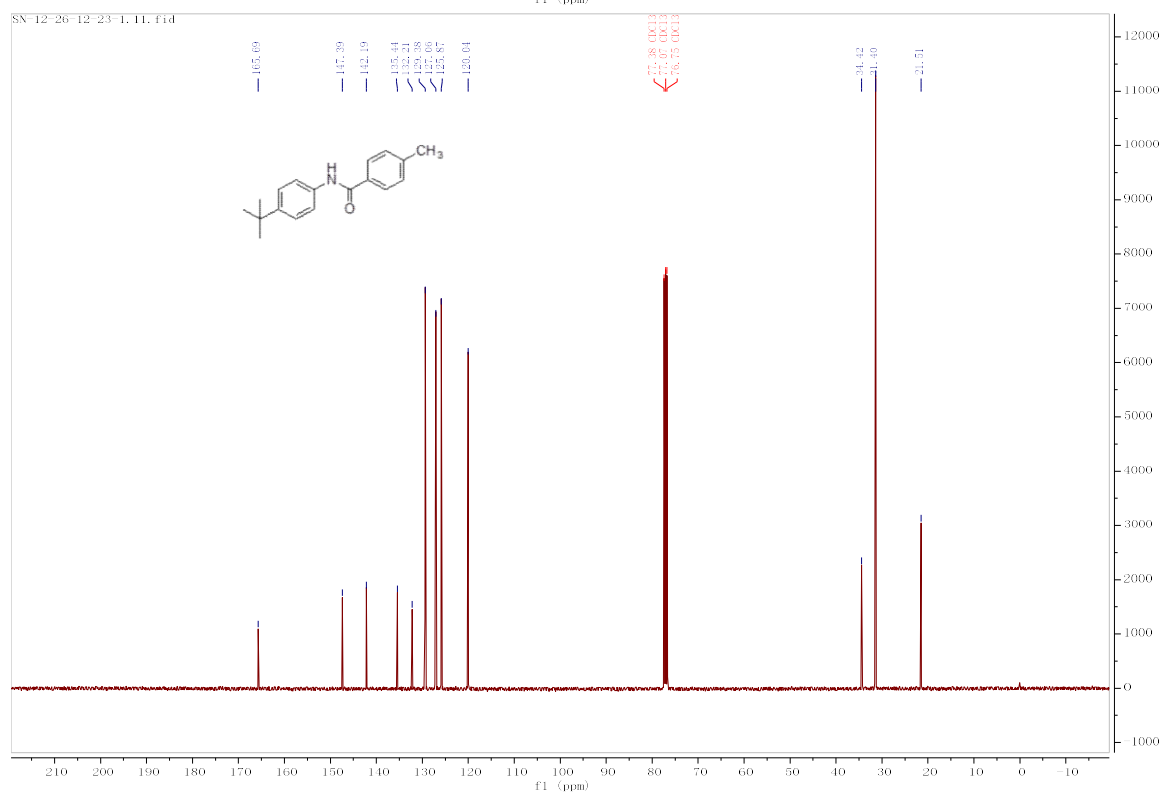

### <sup>1</sup>H and <sup>13</sup>C NMR Spectra of 4-Fluoro-*N-p*-tolylbenzamide (3p)

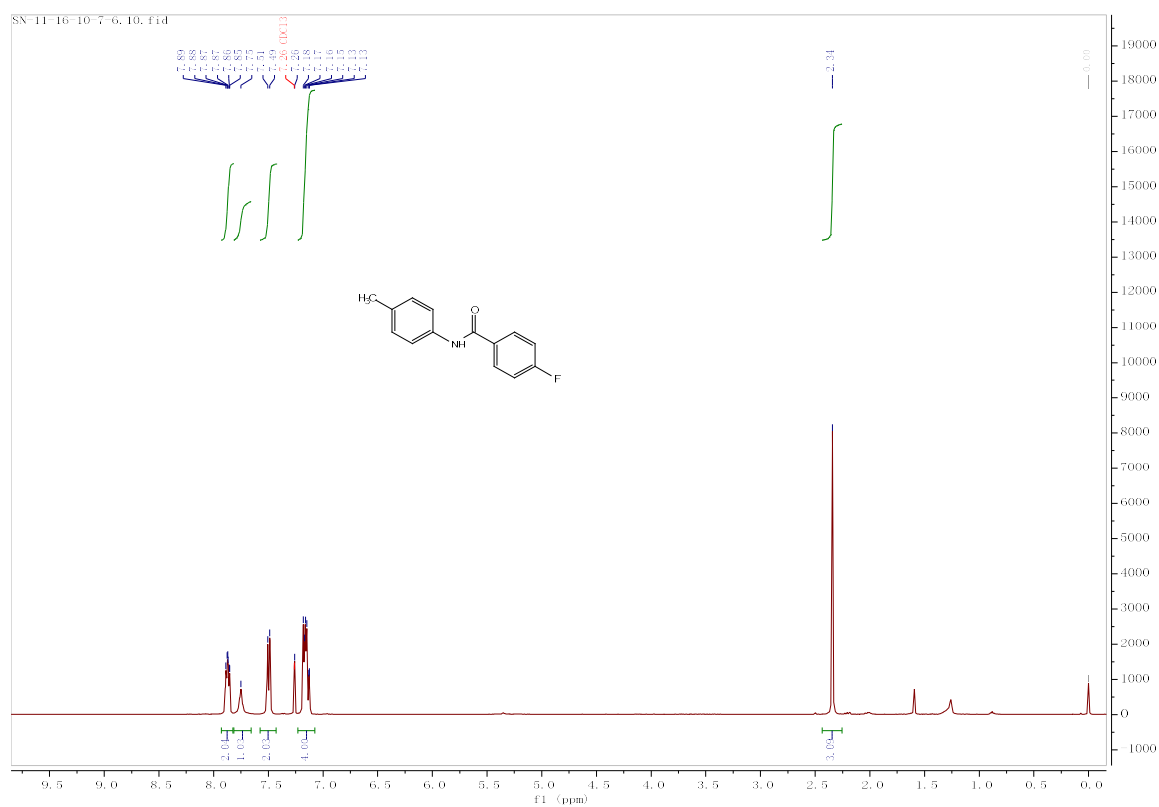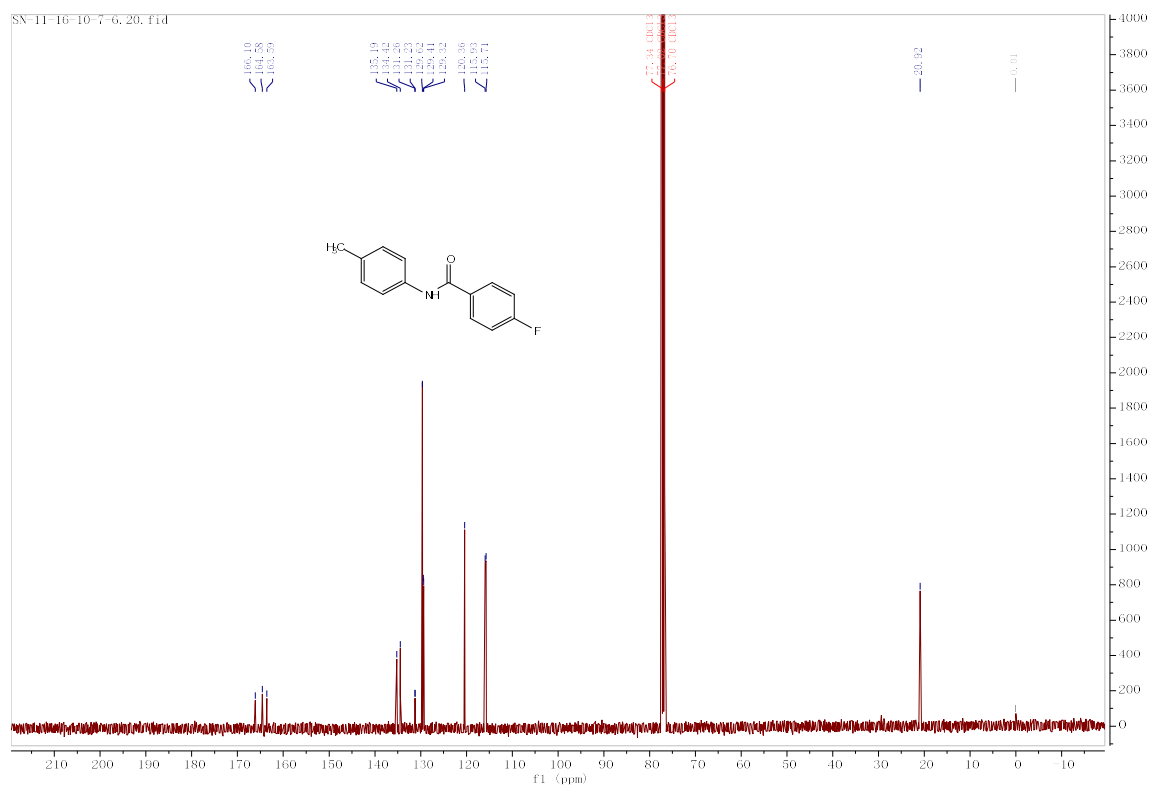

# <sup>1</sup>H and <sup>13</sup>C NMR Spectra of *N*-(3-Methoxy-4-methylphenyl)-4-methylbenzamide (3q)

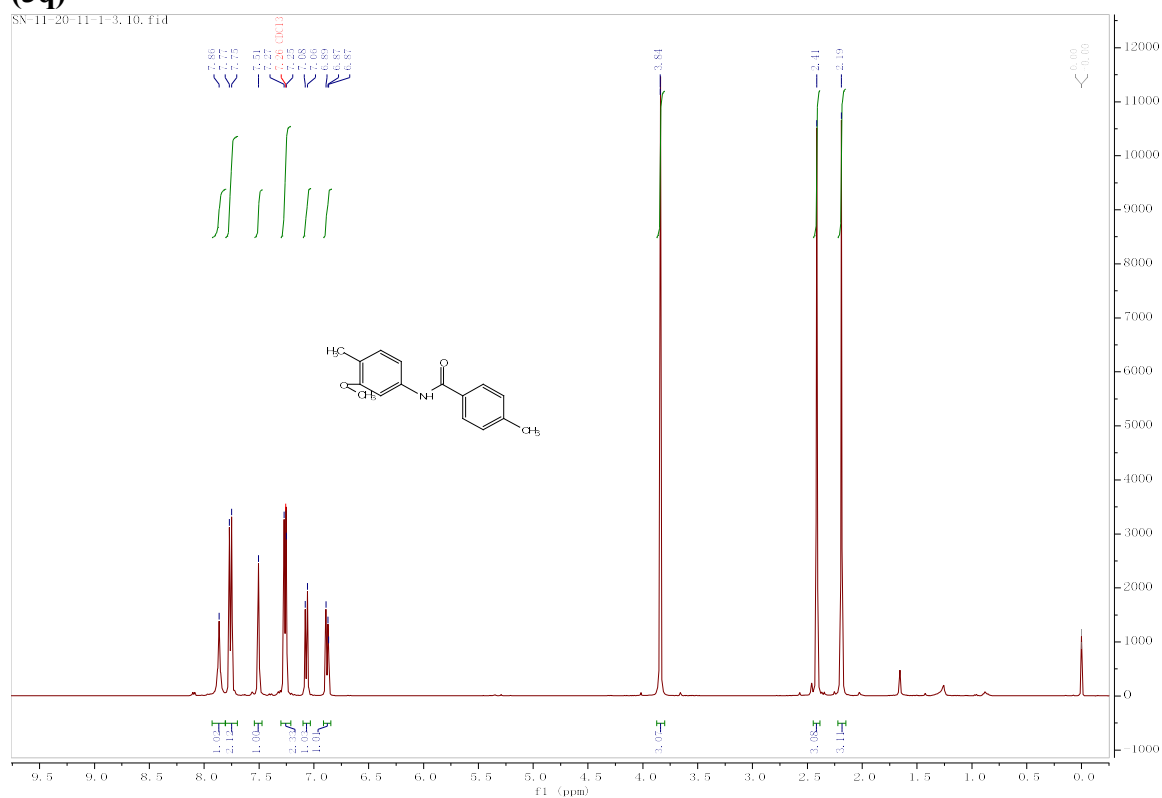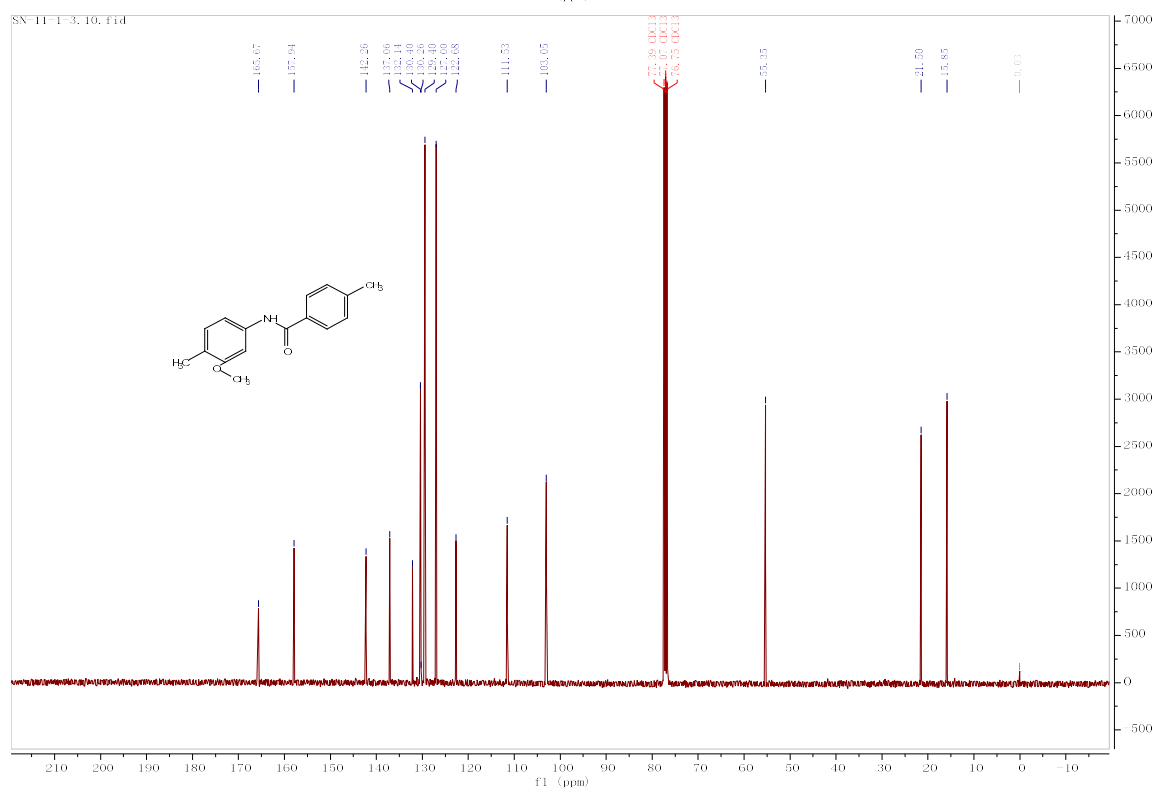

# <sup>1</sup>H and <sup>13</sup>C NMR Spectra of *N*-(3-Methoxy-4-methylphenyl)benzamide (3r)

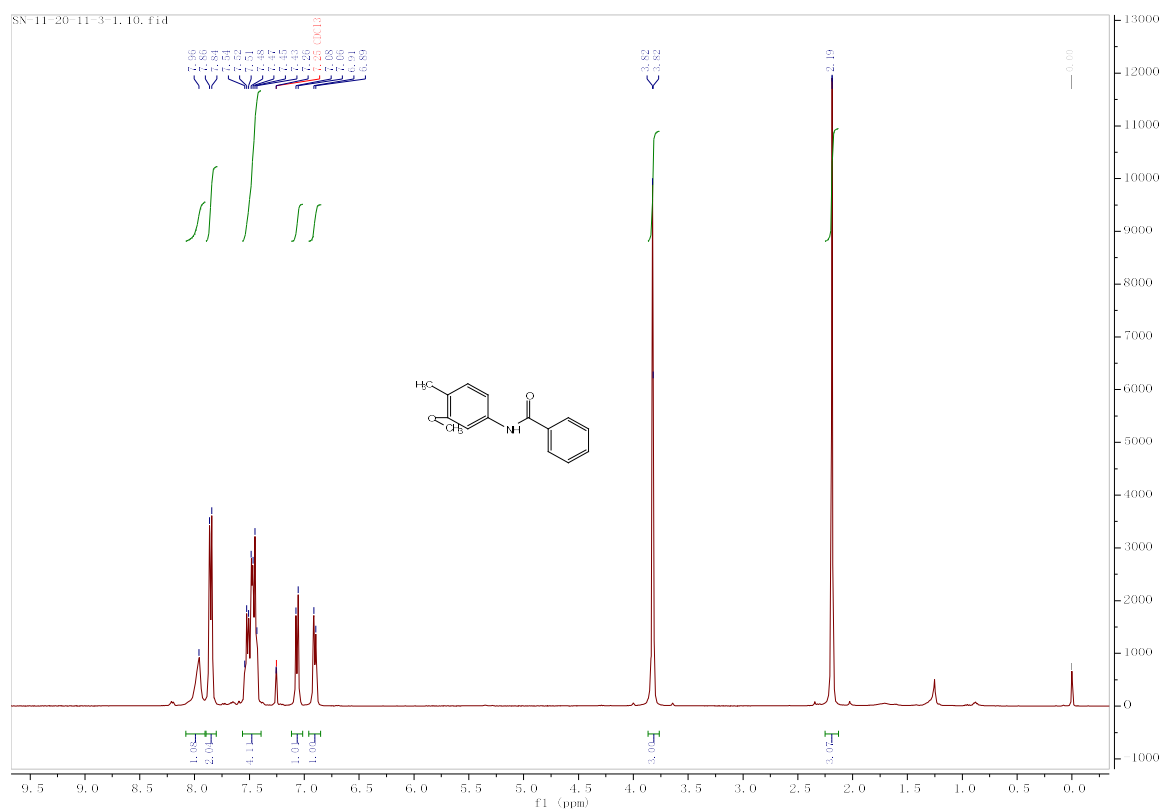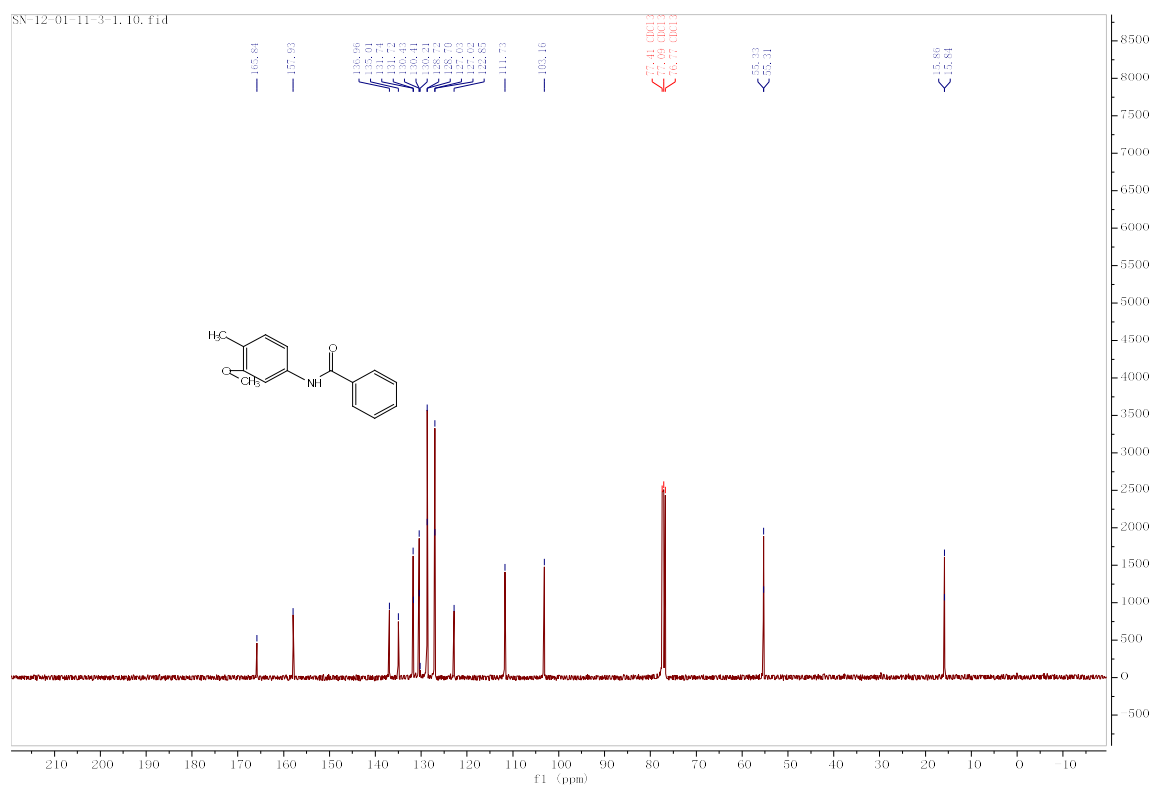

# <sup>1</sup>H and <sup>13</sup>C NMR Spectra of 4-Methyl-N-(2,4-dimethylphenyl)benzamide (3s)

SN-12-19-11-25-2, 10, f1d

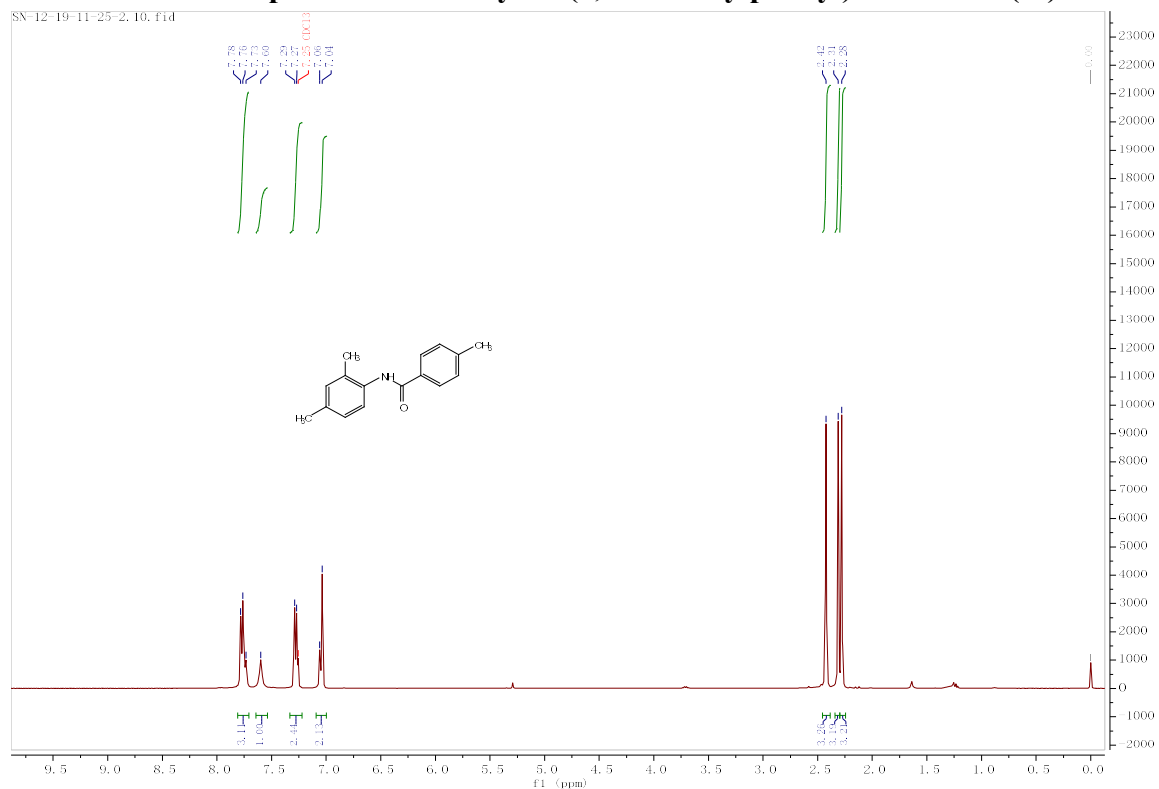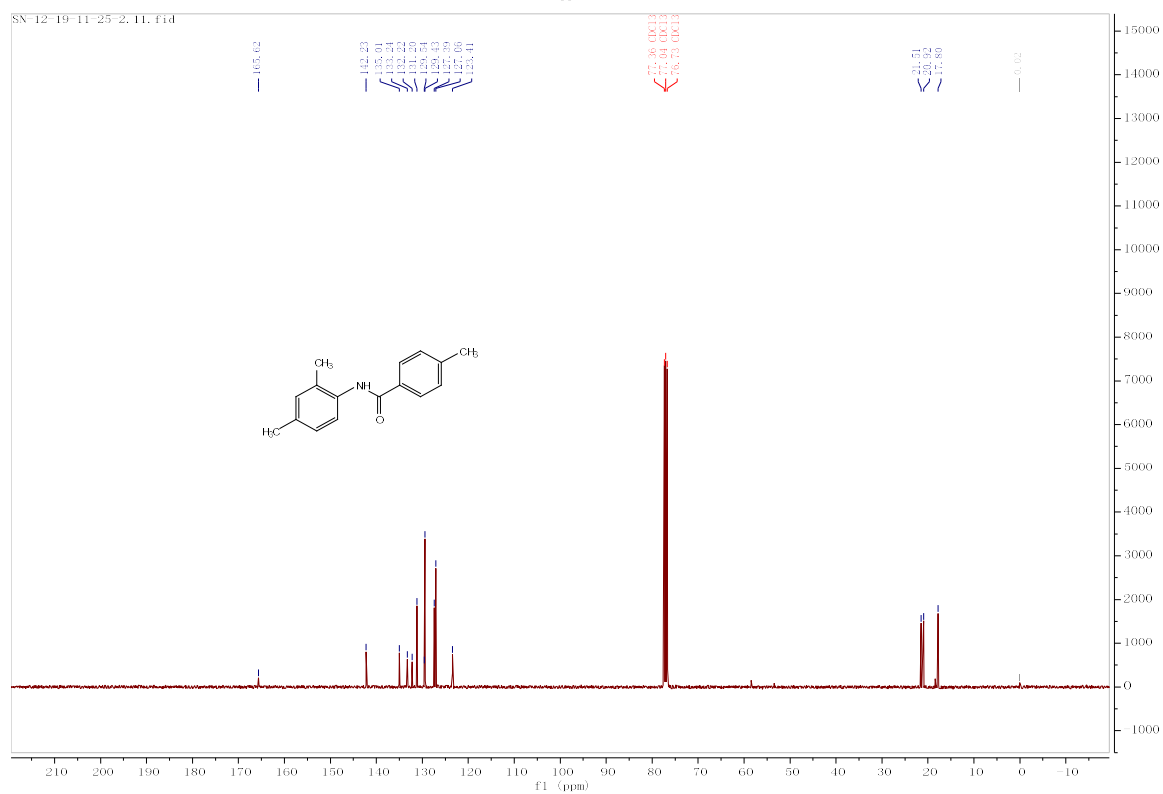

## SN-12-06-11-24-1, 10, fid

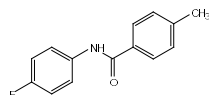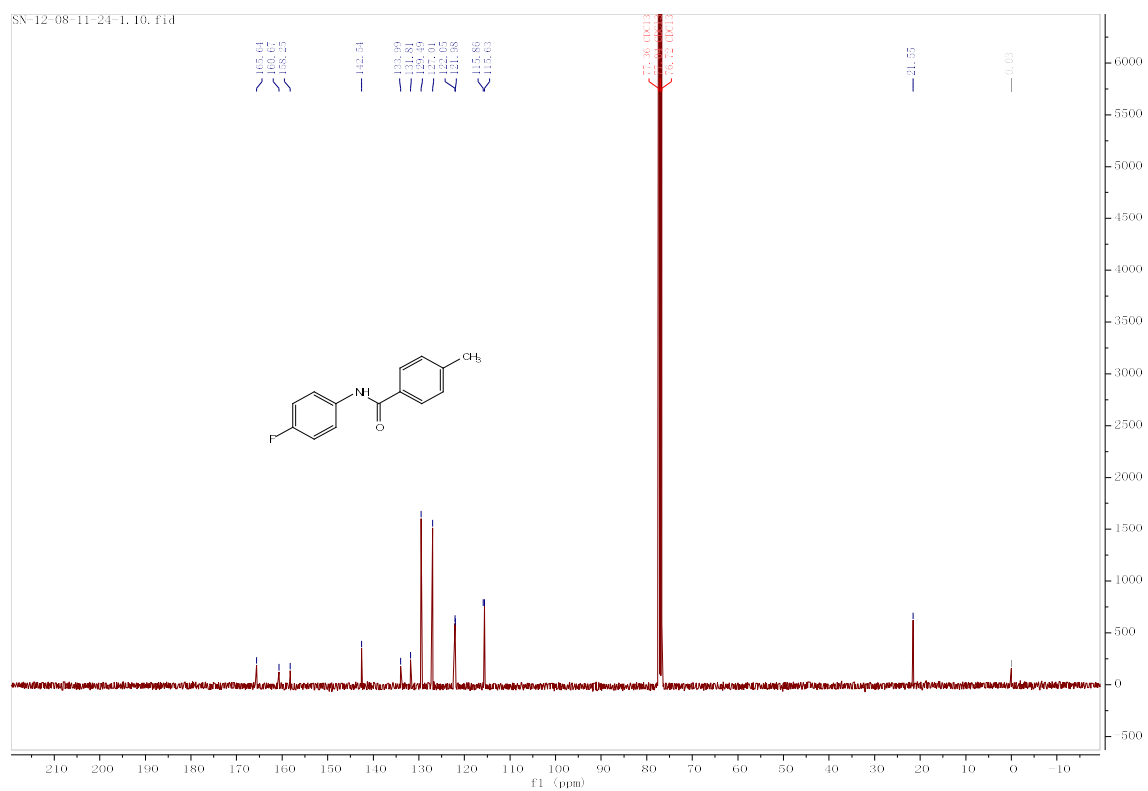

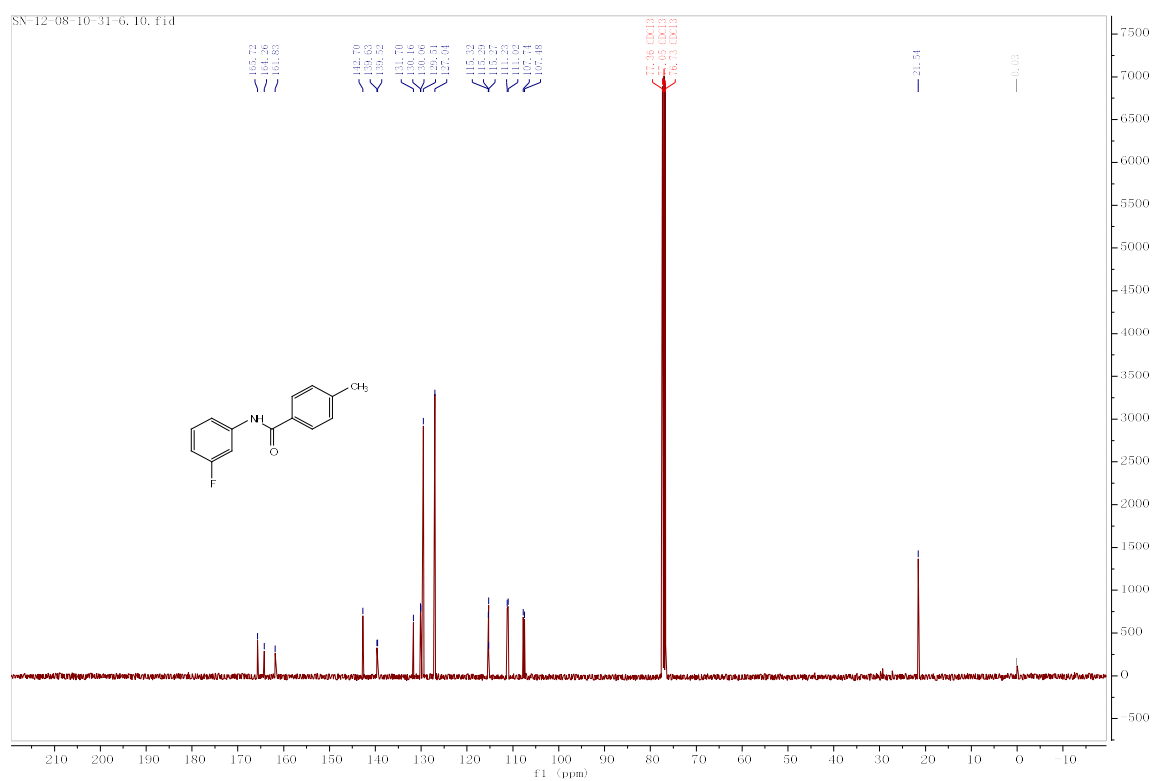

## SN-11-20-10-23-4, 10, fid

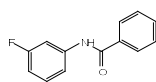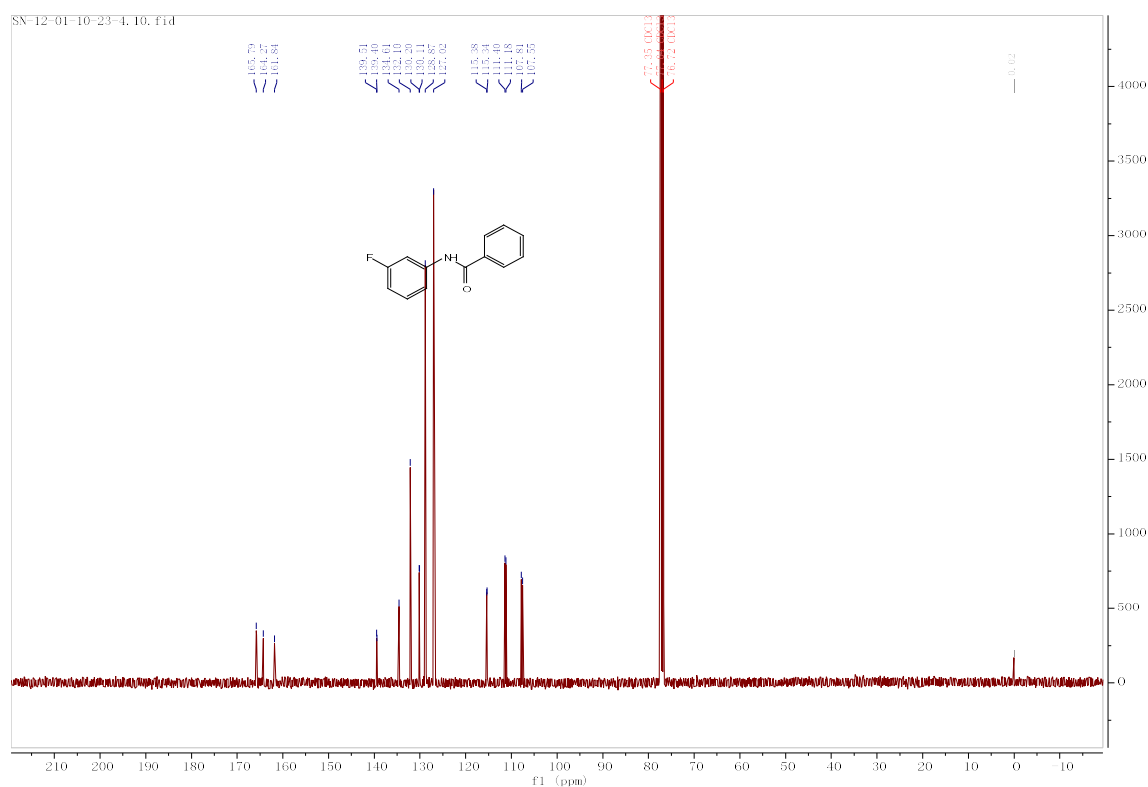



# <sup>1</sup>H and <sup>13</sup>C NMR Spectra of 4-Fluoro-N-(3-fluorophenyl)benzamide (3w)

SN-11-20-10-24-3, 10, F1d

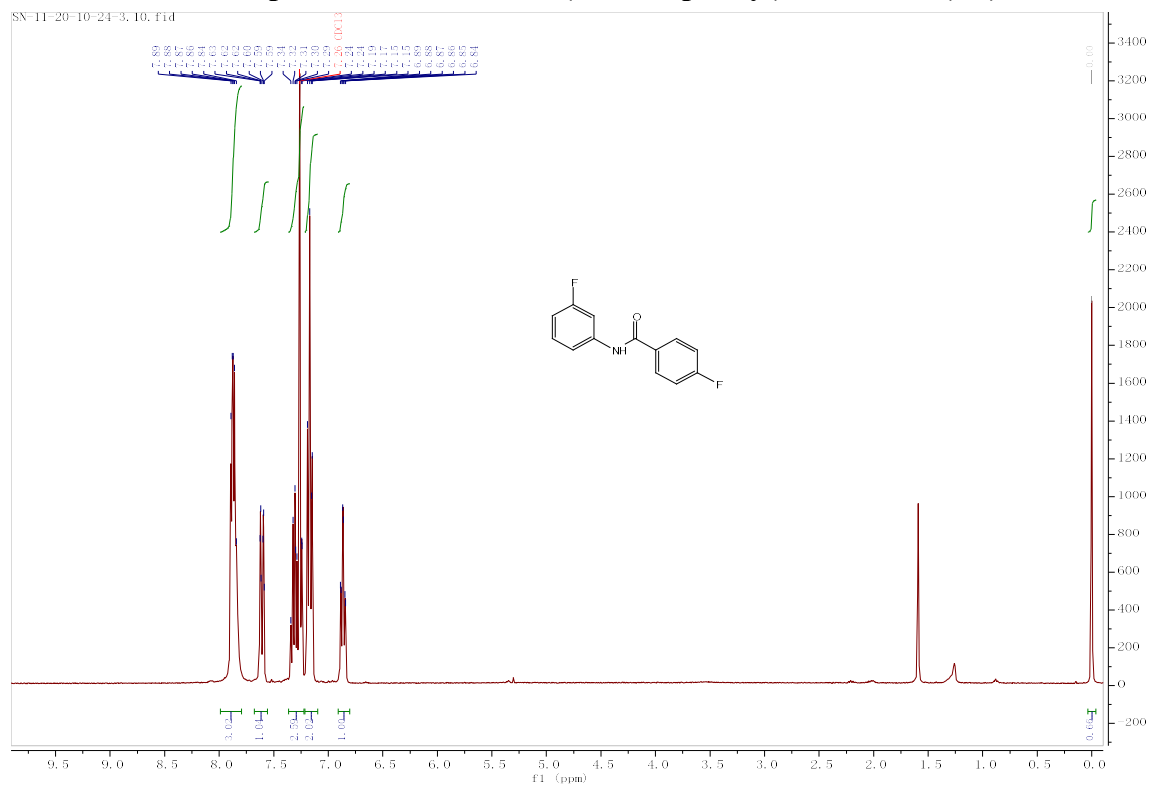

SN-10-23-2, 10, F1d

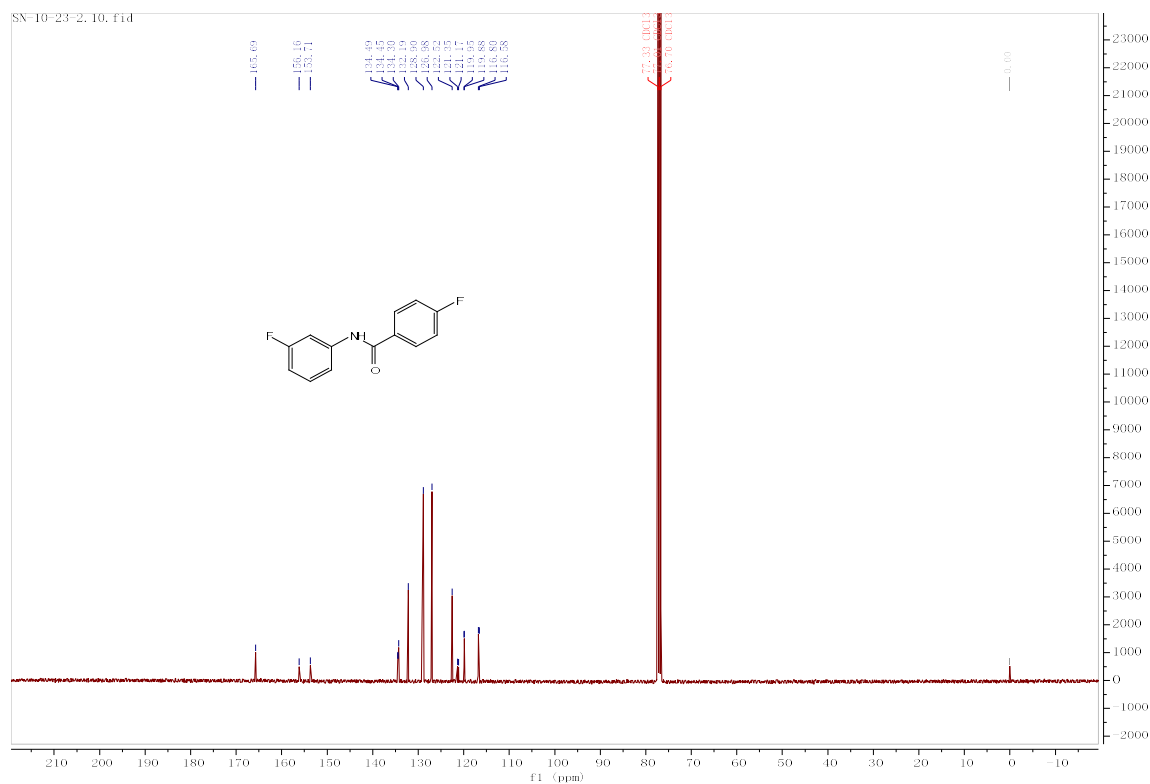

# <sup>1</sup>H and <sup>13</sup>C NMR Spectra of *N*-(3-Chloro-4-fluorophenyl)-4-methylbenzamide (3x)

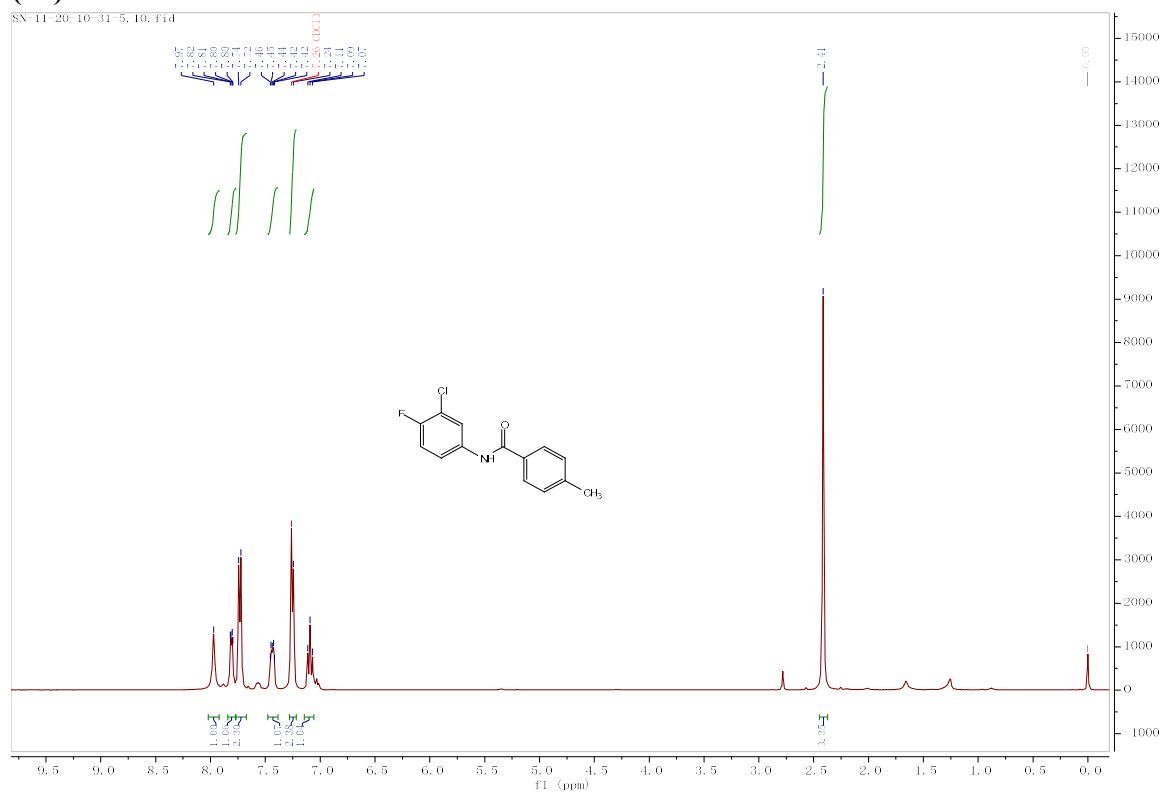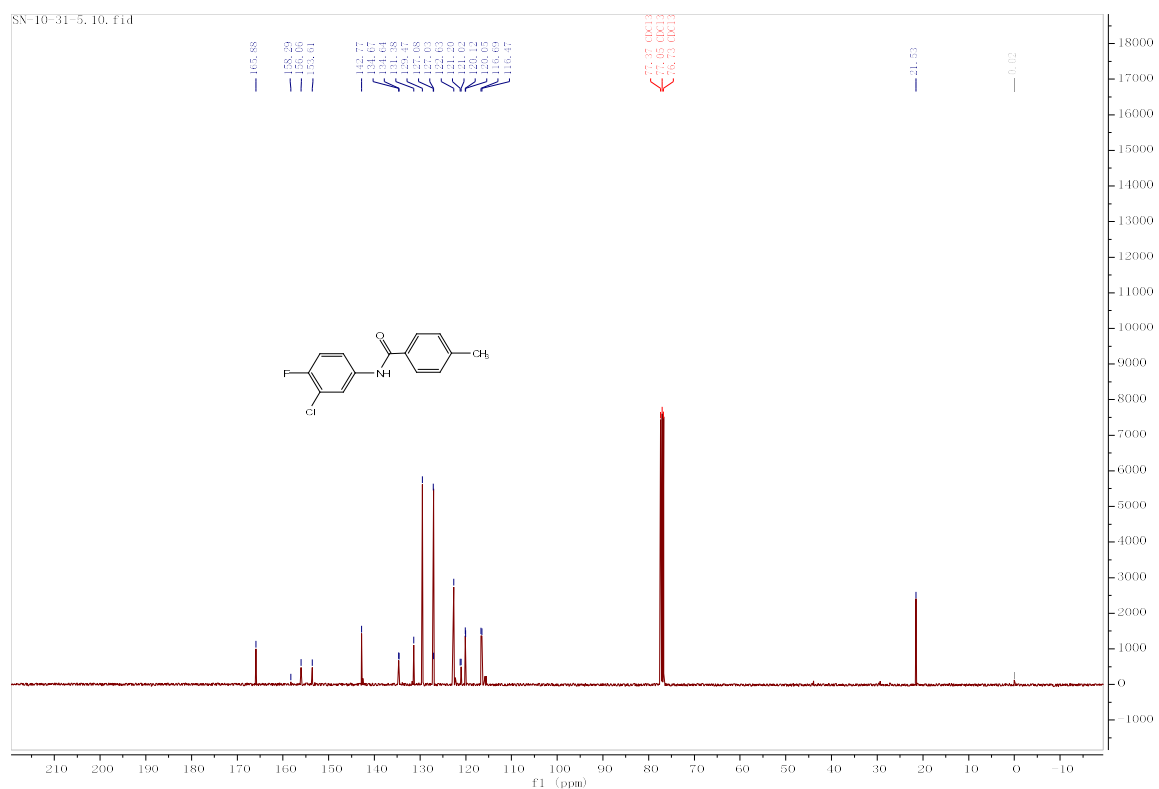

## SN-11-20-10-23-2, 10, fid

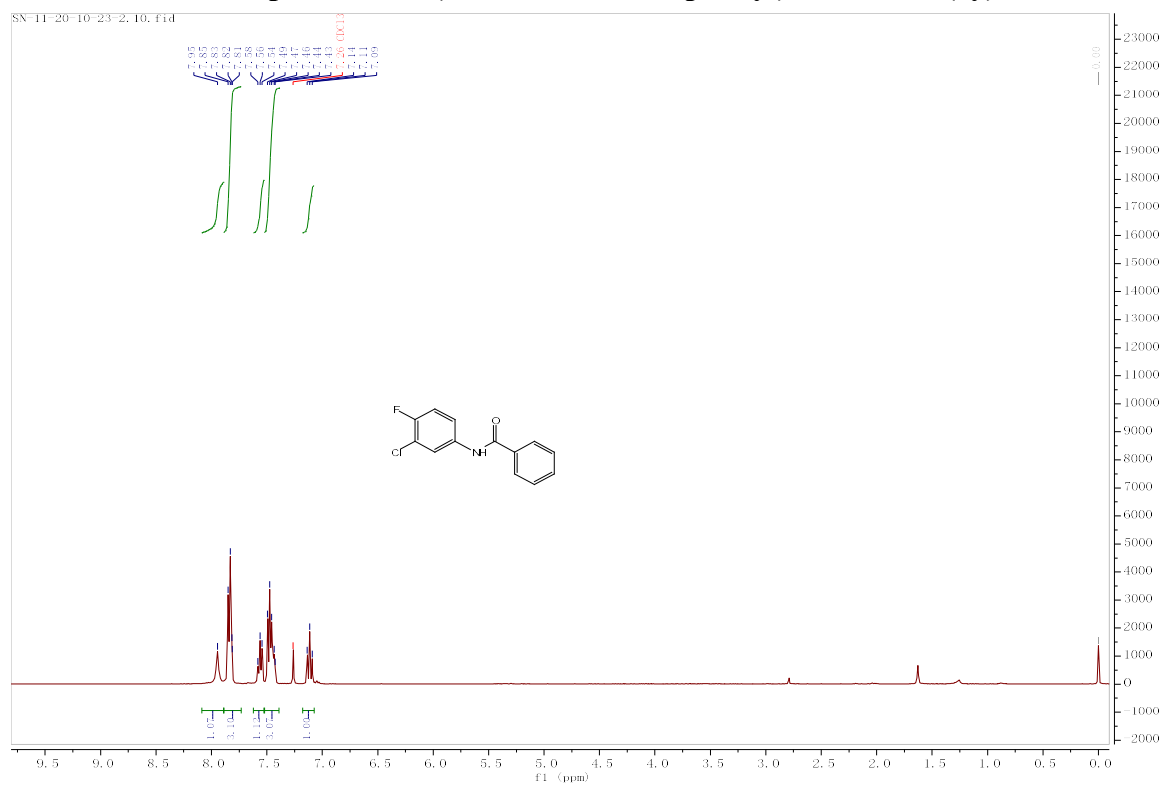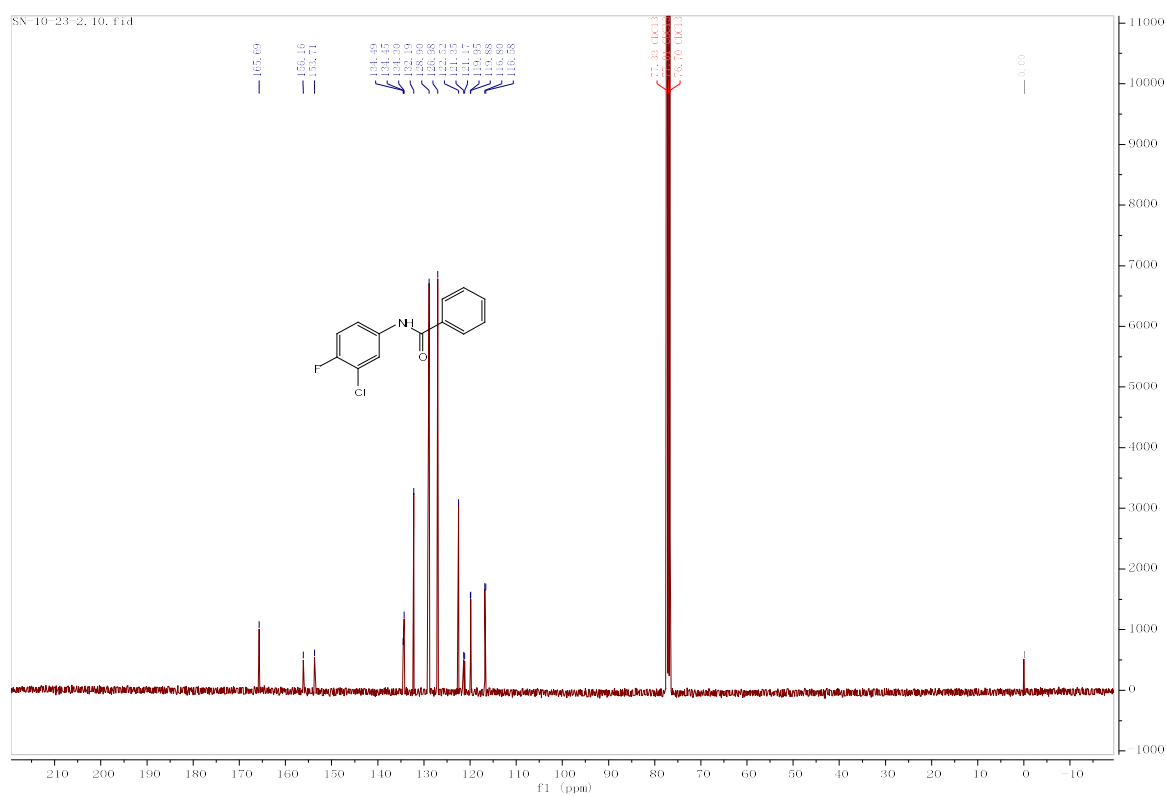

# <sup>1</sup>H and <sup>13</sup>C NMR Spectra of *N*-(3-Chloro-4-fluorophenyl)-4-fluorobenzamide (3z)

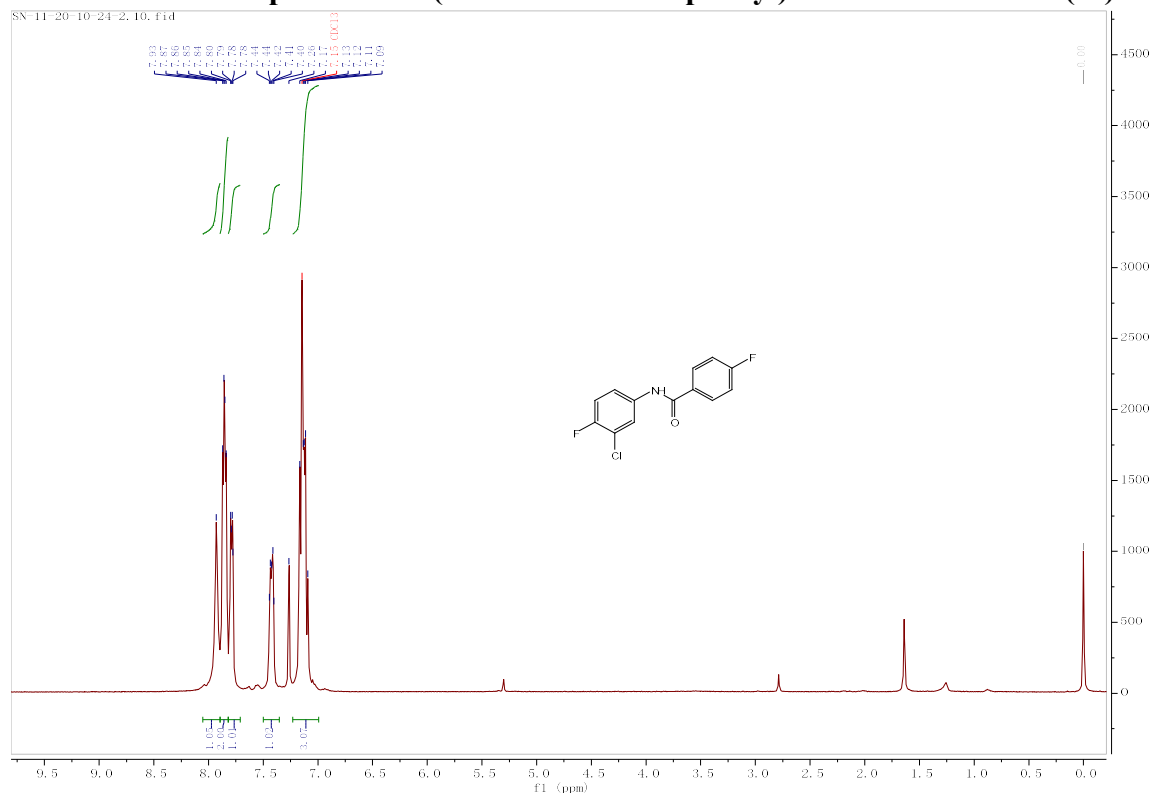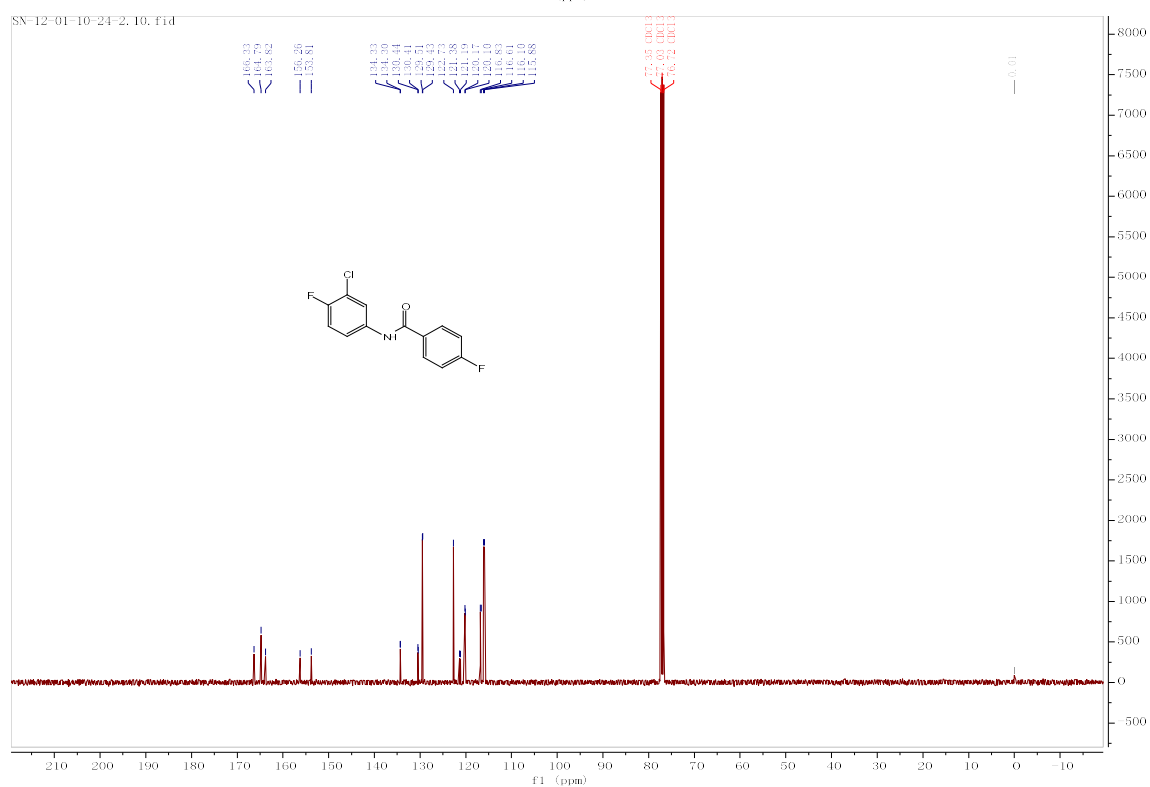

# <sup>1</sup>H and <sup>13</sup>C NMR Spectra of *N*-(2,3,4-Trifluorophenyl)benzamide (3aa)

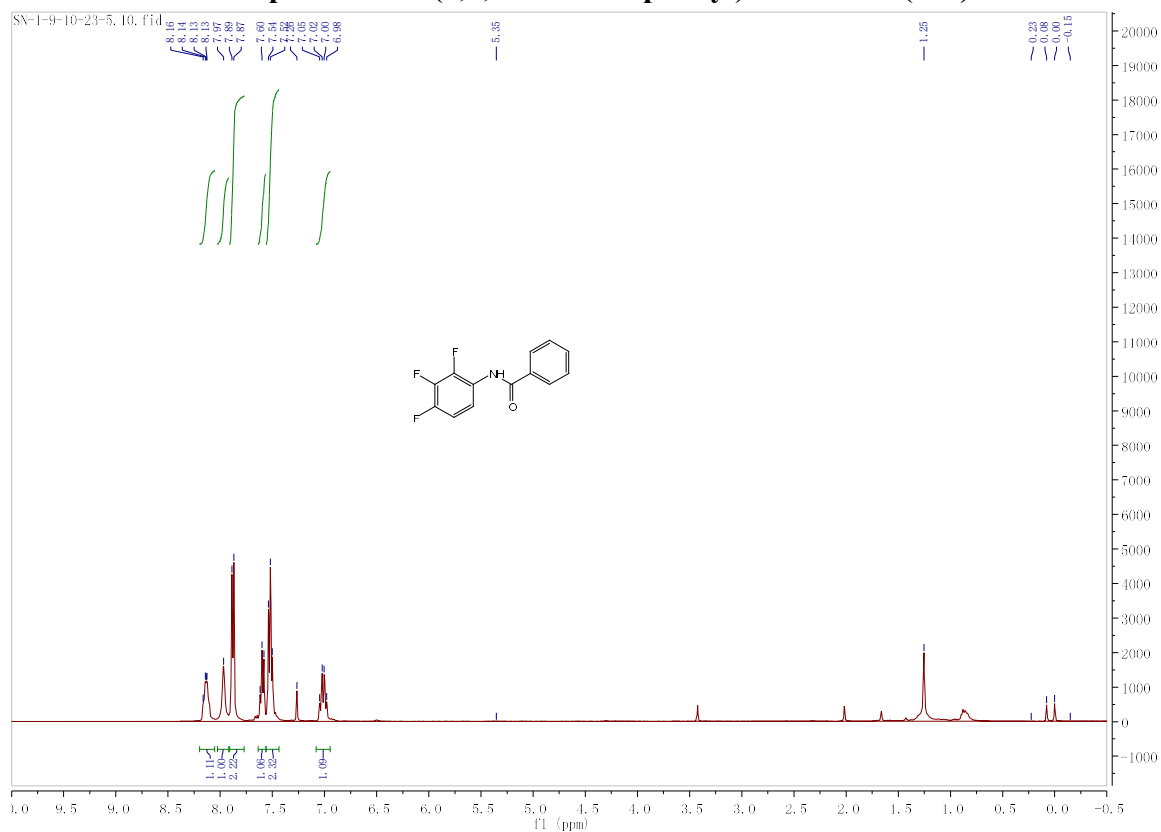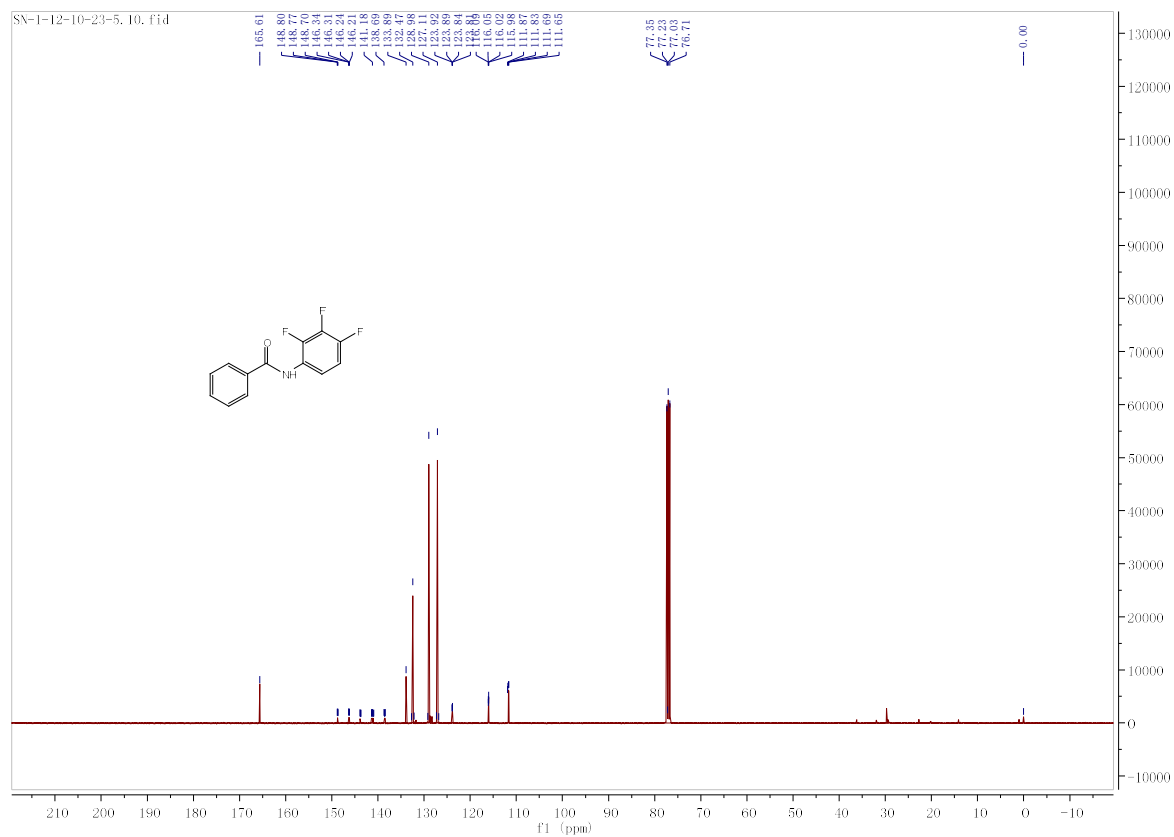

# <sup>1</sup>H and <sup>13</sup>C NMR Spectra of 4-Fluoro-N-(2,3,4-trifluorophenyl)benzamide (3ab)

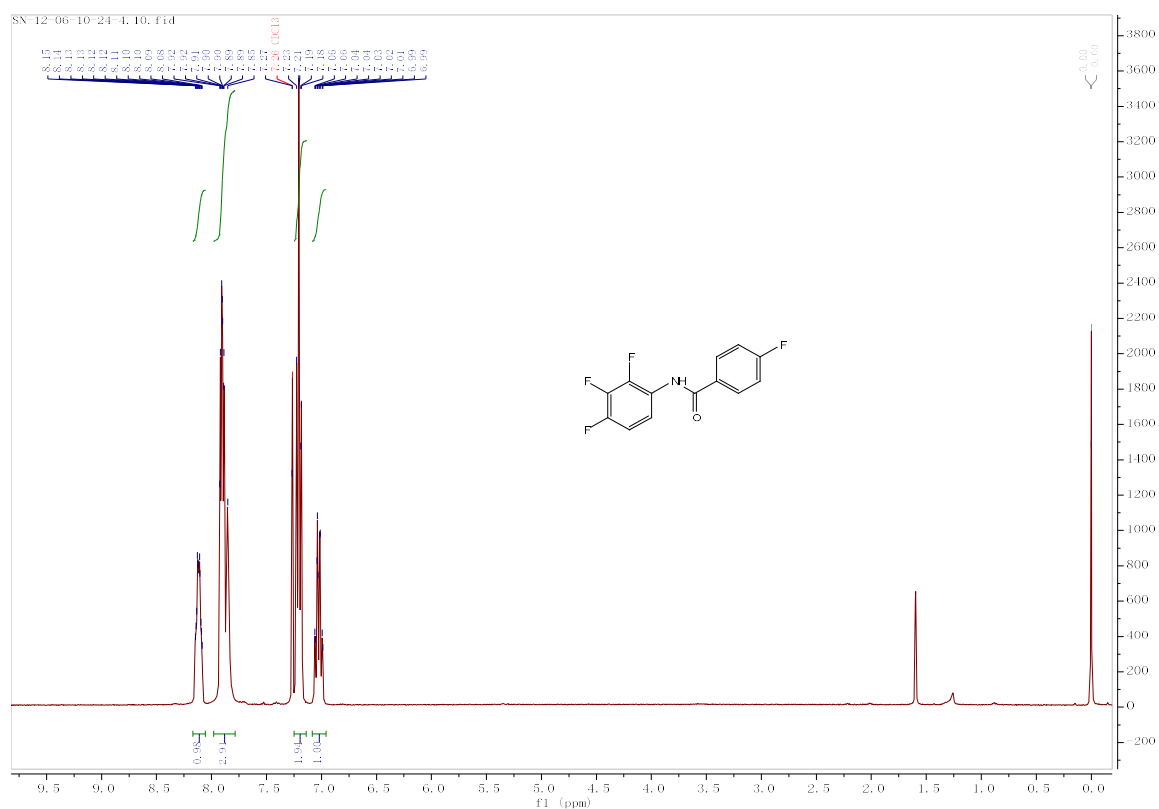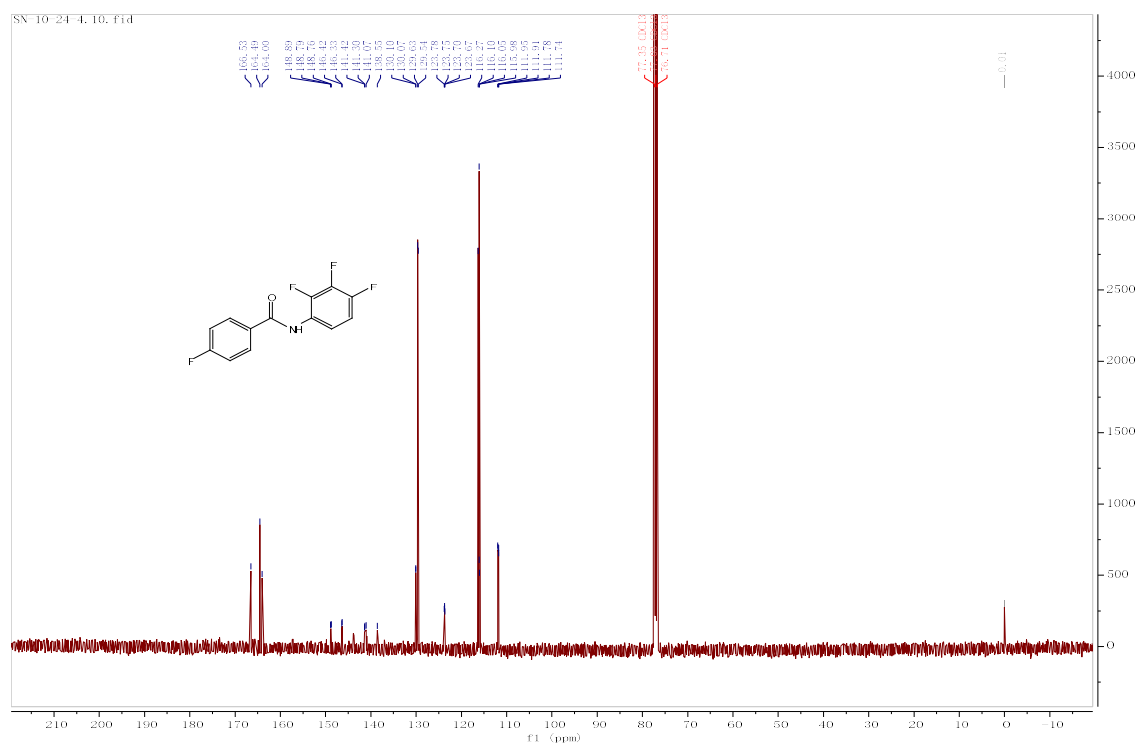

SN-12-26-12-19-1\_10.f1d

Chemical structure: Cc1ccc(cc1)C(=O)Nc2cc(C)ccc2C#N

<sup>1</sup>H NMR spectrum (ppm) showing peaks and integration values:

- Peak at ~8.1 ppm: Integration 1.00
- Peak at ~8.0 ppm: Integration 1.00
- Peak at ~7.8 ppm: Integration 1.00
- Peak at ~7.4 ppm: Integration 1.00
- Peak at ~2.5 ppm: Integration 3.00
- Peak at ~2.3 ppm: Integration 3.00

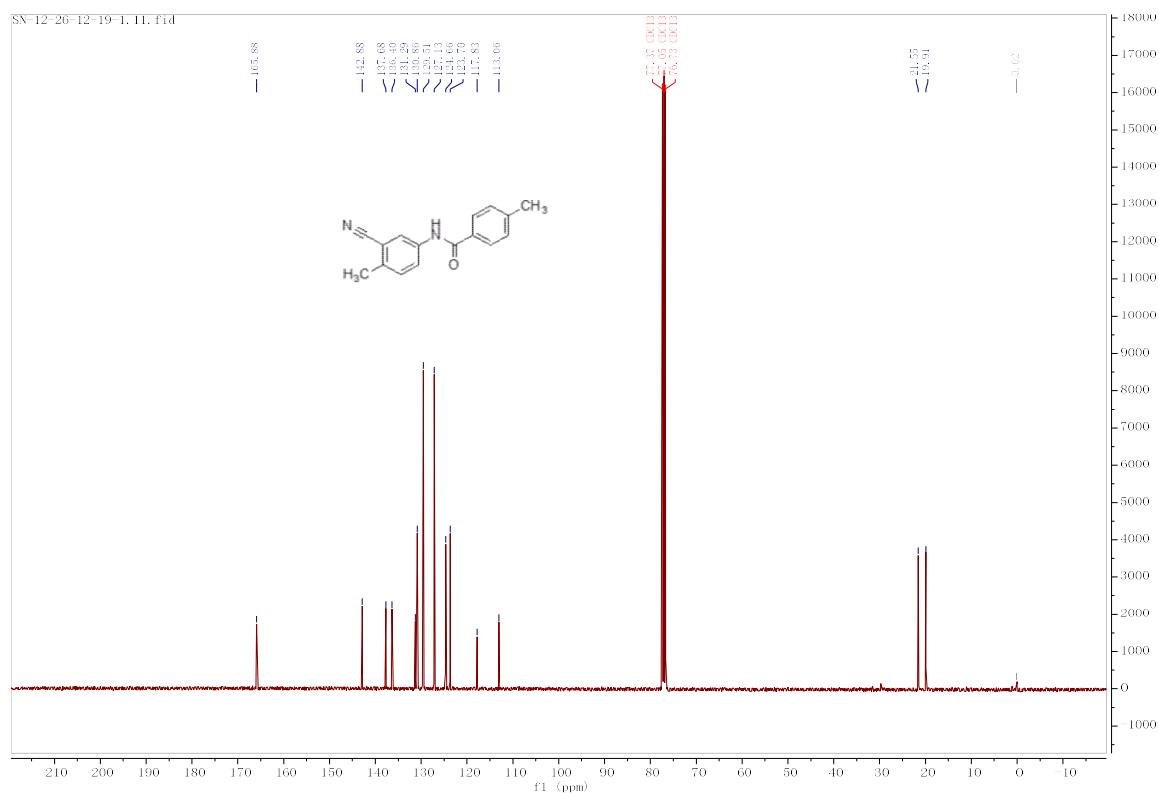

### <sup>1</sup>H and <sup>13</sup>C NMR Spectra of *N*-(4-(4-Benzoylphenoxy)phenyl)benzamide (3ad)

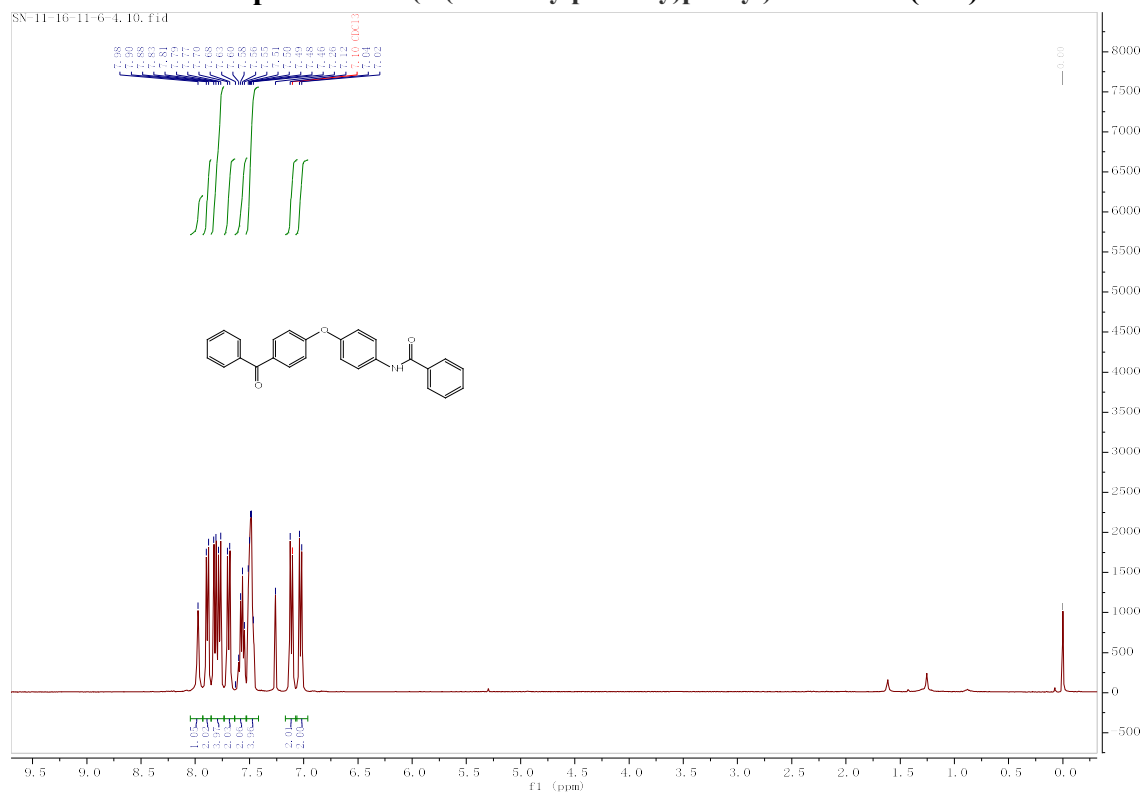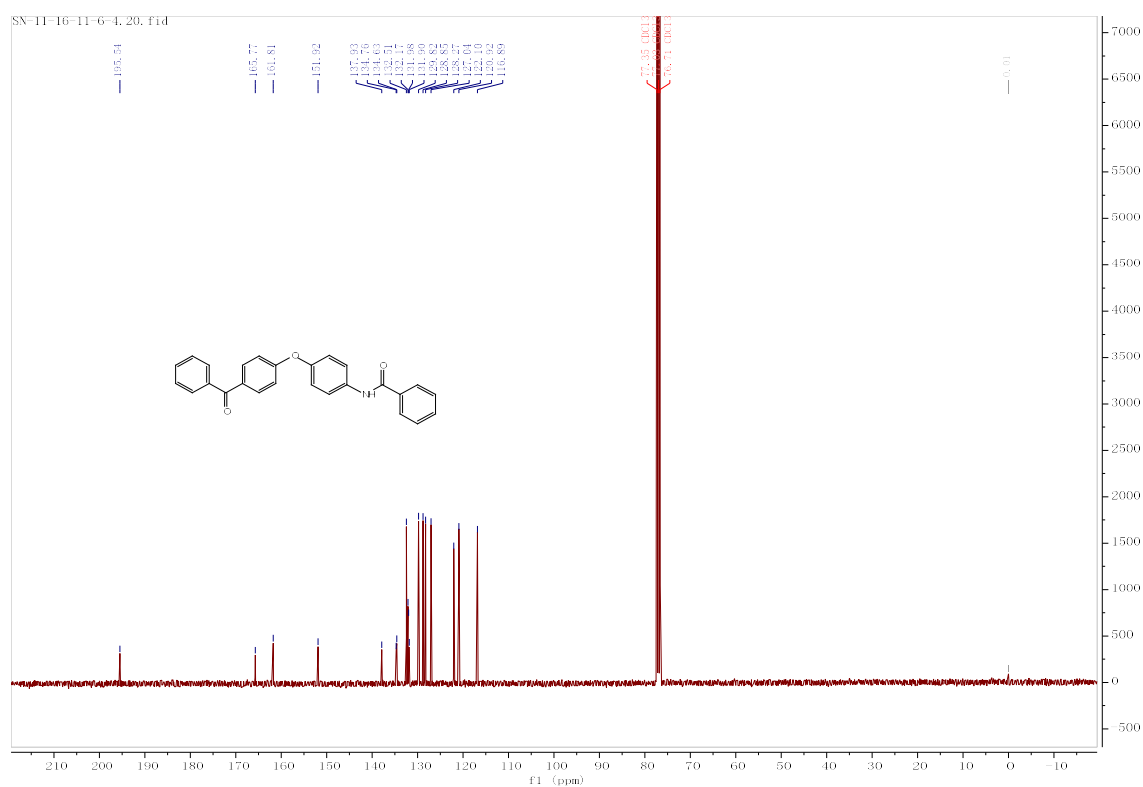



# <sup>1</sup>H and <sup>13</sup>C NMR Spectra of *N*-(Benzo[d][1,3]dioxol-6-yl)-3,4-dimethylbenzamide (3ae)

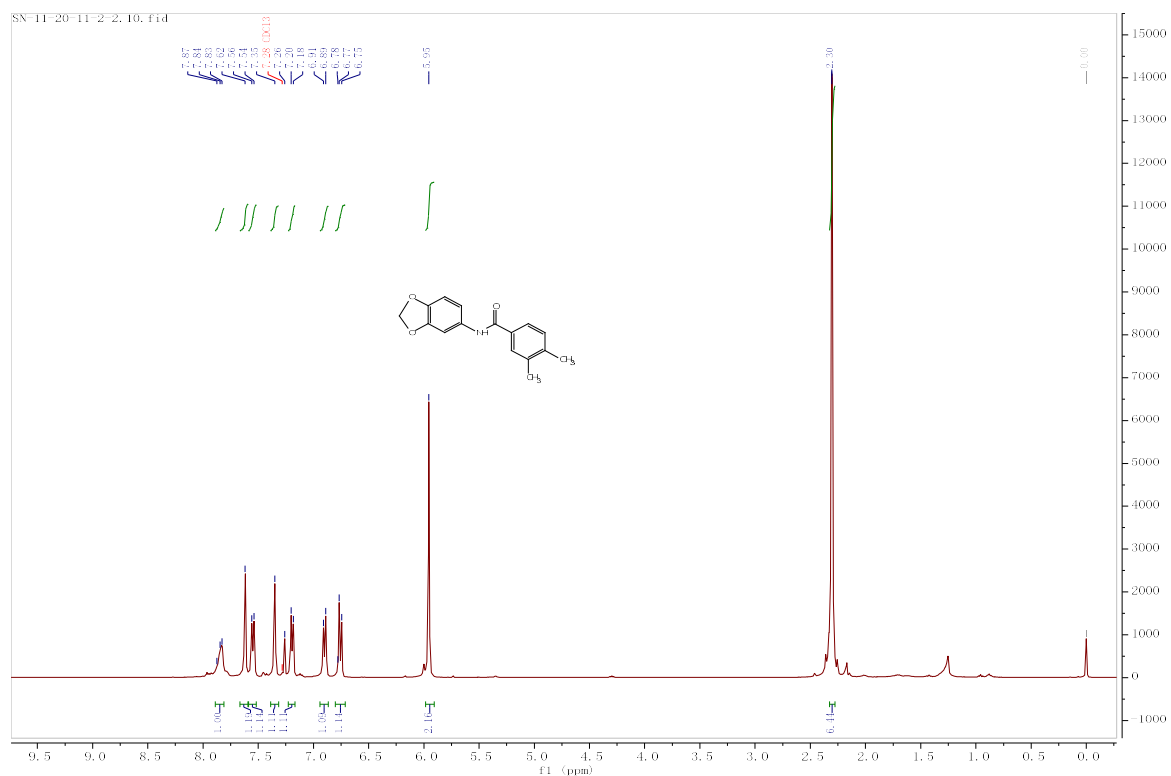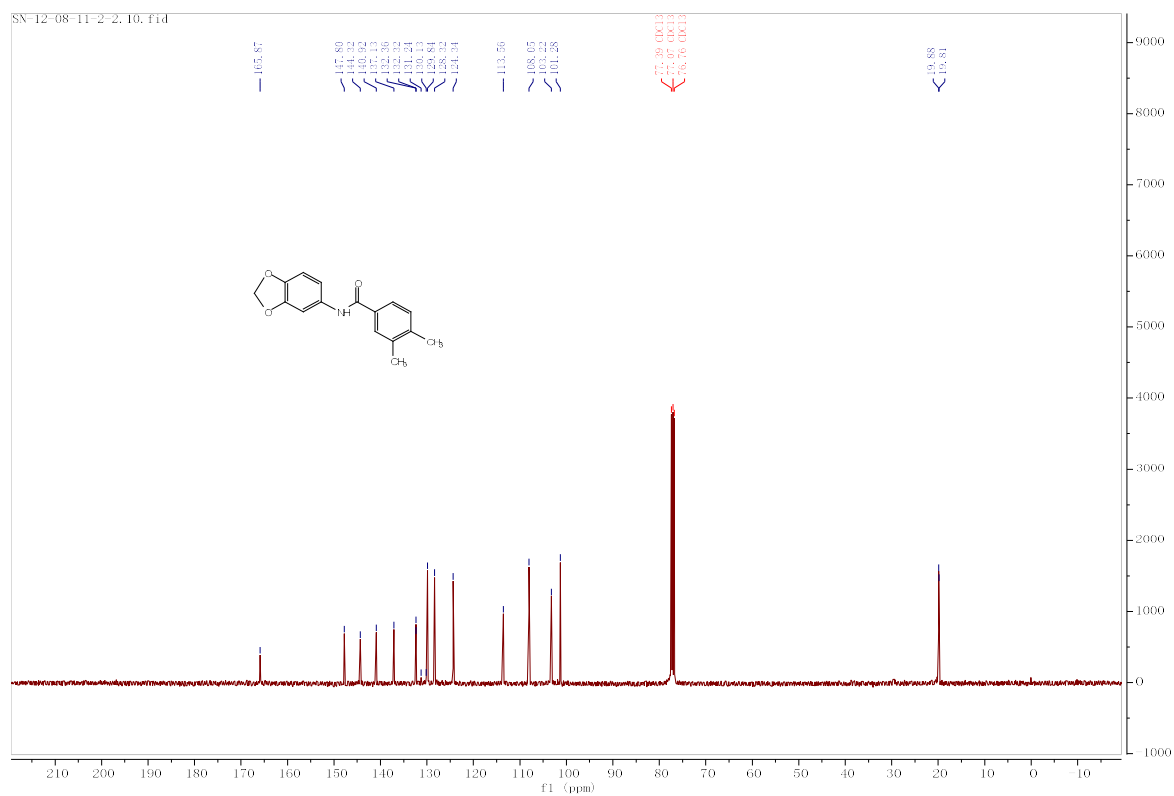

# <sup>1</sup>H and <sup>13</sup>C NMR Spectra of *N*-(Benzo[*b*]thiophen-5-yl)-4-methylbenzamide (3af)

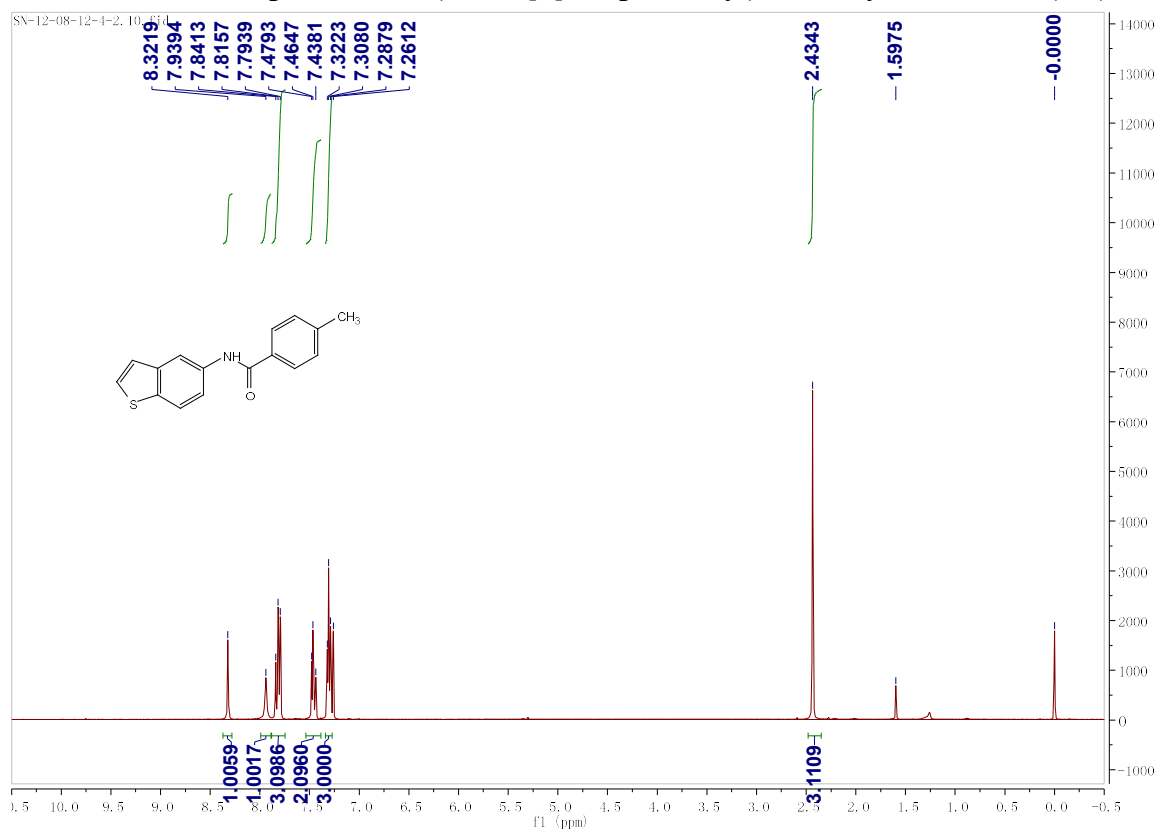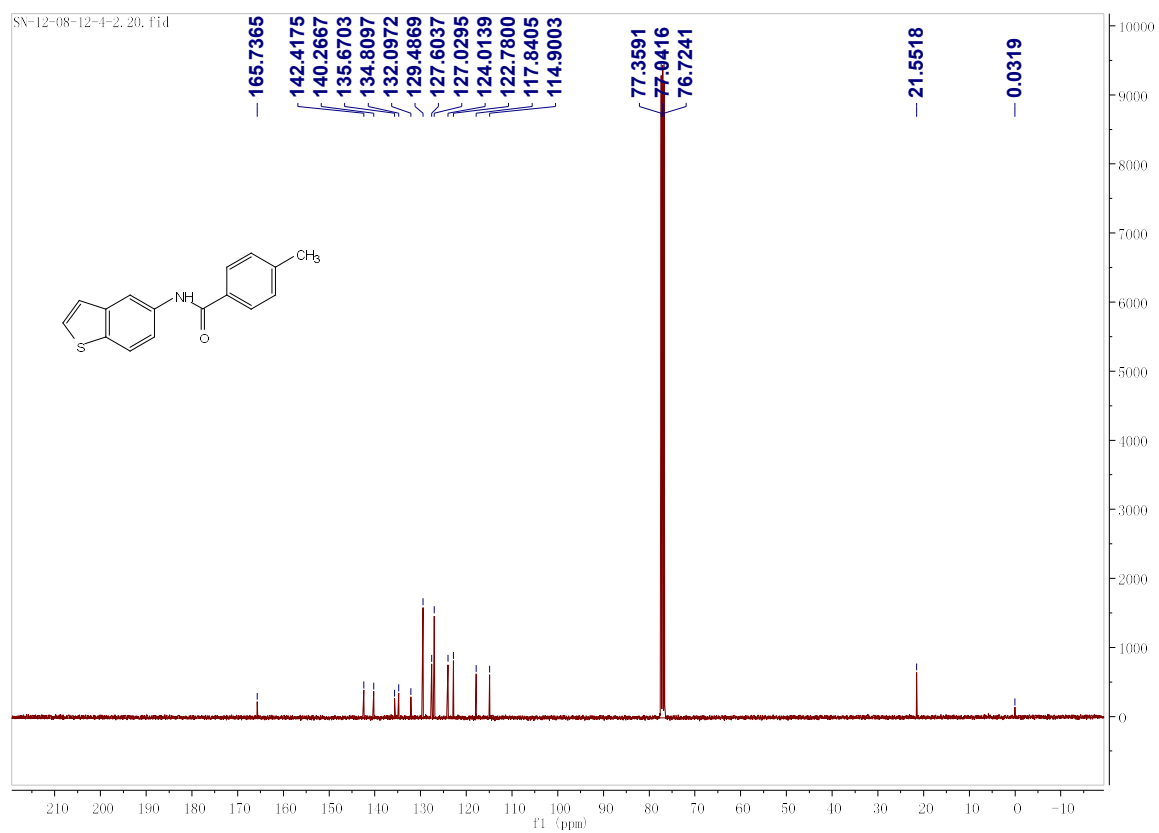

## [SN-12-19-12-12-4, 10, fid]

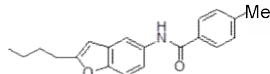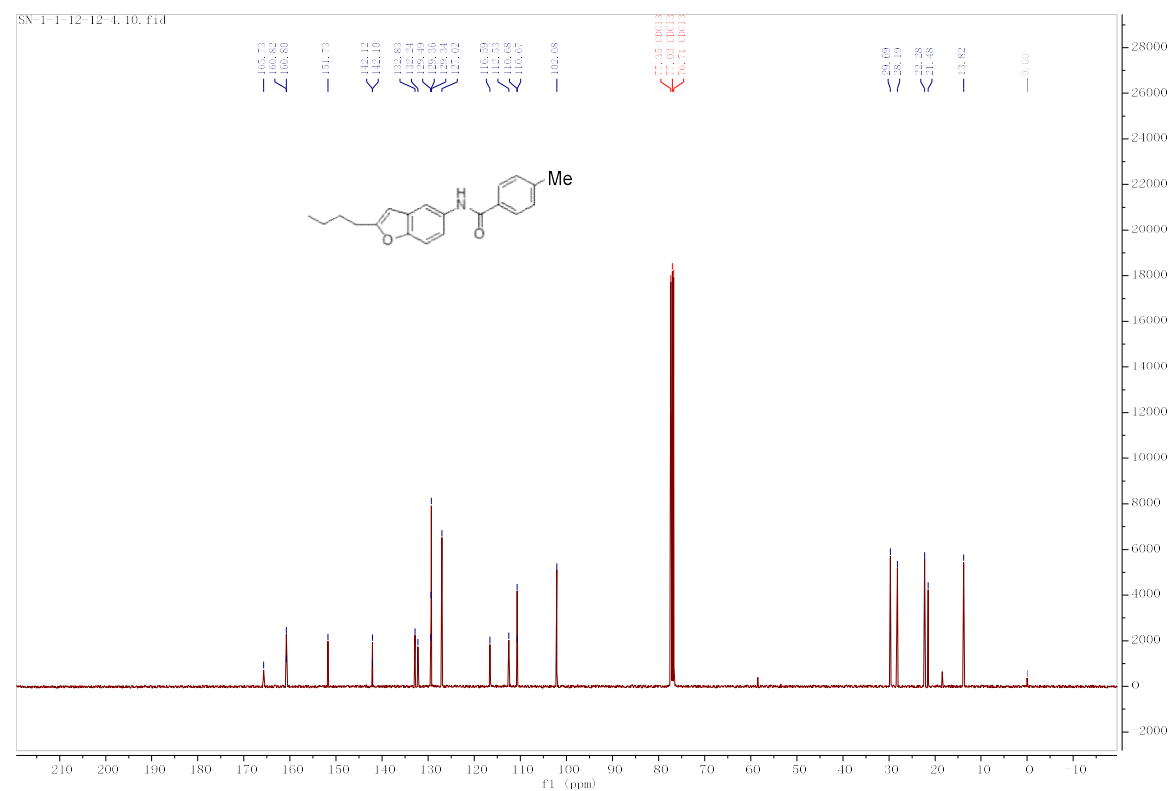

sn-12-4-3.10.fid

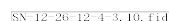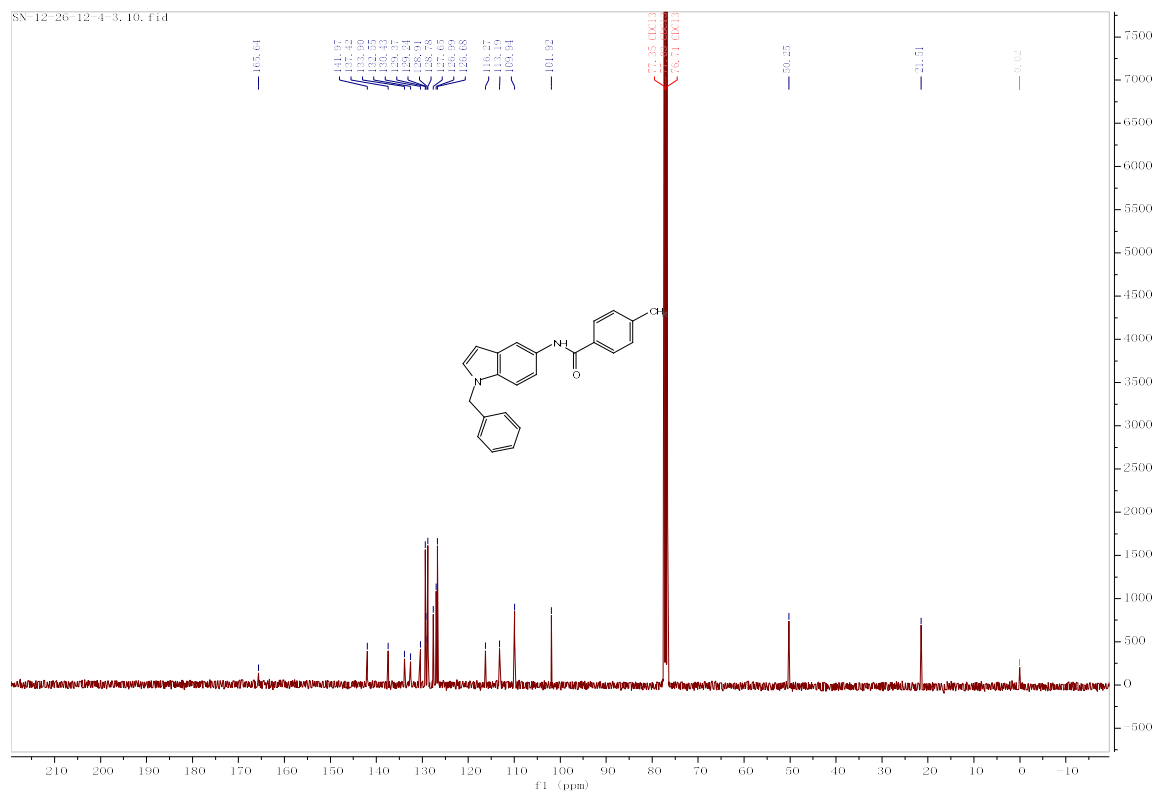

# <sup>1</sup>H and <sup>13</sup>C NMR Spectra of N-(2-Phenylbenzo[d]oxazol-5-yl)benzamide (4a)

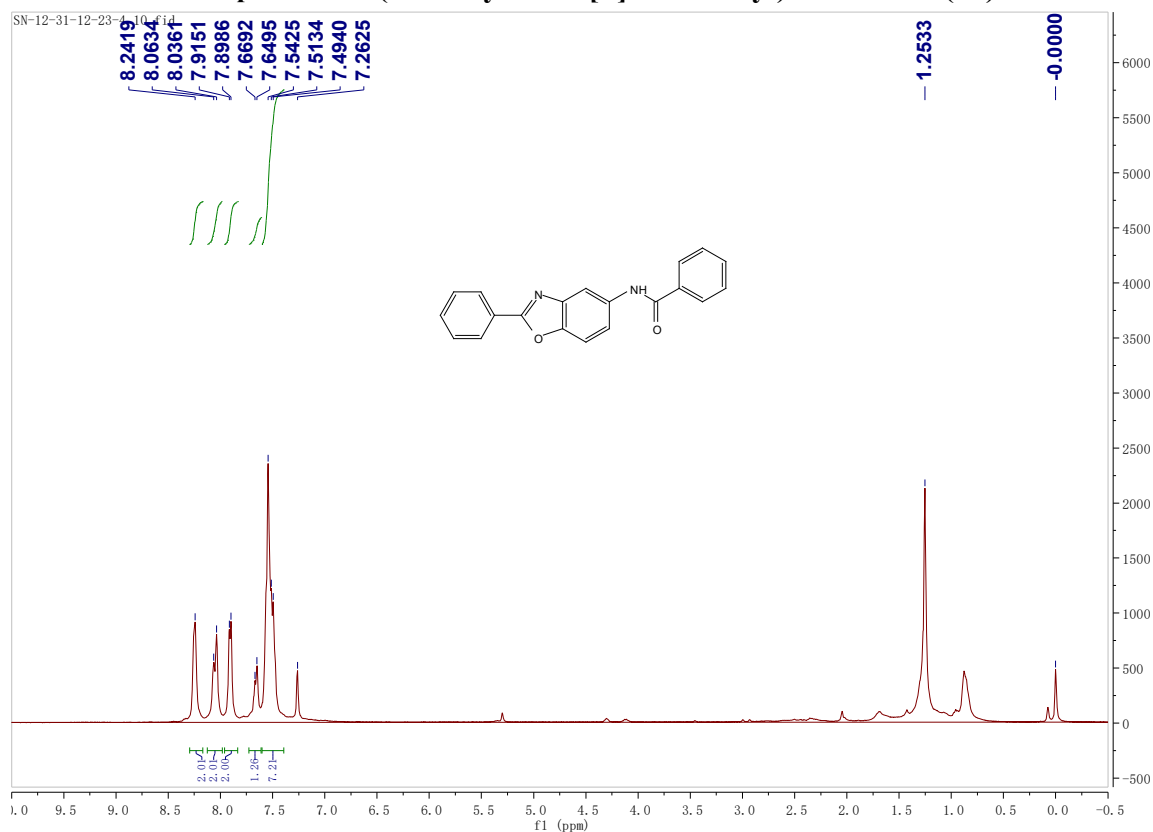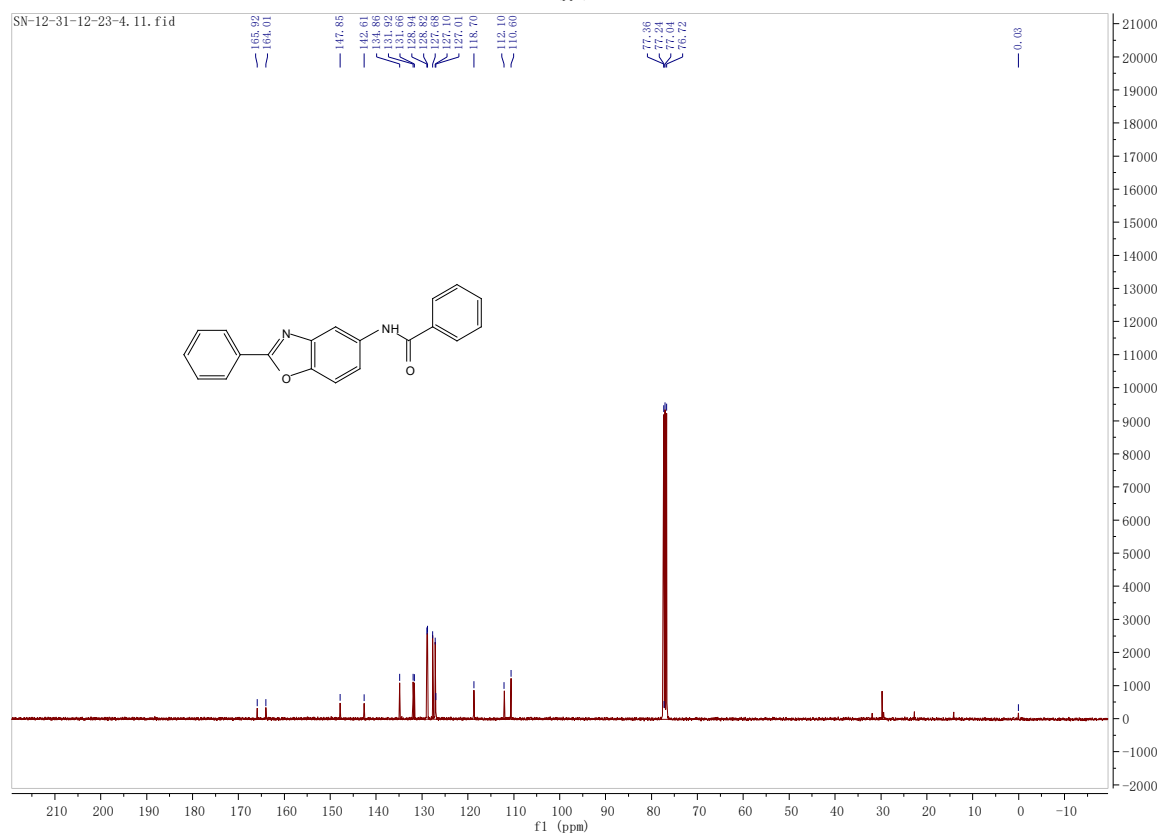

<sup>1</sup>H NMR spectrum (DMSO-d<sub>6</sub>) of N-(4-fluorophenyl)-2-phenyl-1-benzoxazole-5-carboxamide. The spectrum shows peaks from 0 to 10 ppm. Aromatic protons appear between 7.0 and 8.5 ppm, the amide NH at ~5.2 ppm, and aliphatic protons at ~1.5 ppm. Integration values are shown below the peaks, and a chemical structure is displayed above the spectrum.

Chemical structure: Nc1ccc(F)cc1C(=O)Nc2ccc3c(c2)oc(c3)c4ccccc4

Integration values (from left to right): 2.13, 1.05, 3.01, 1.04, 4.08, 2.00.

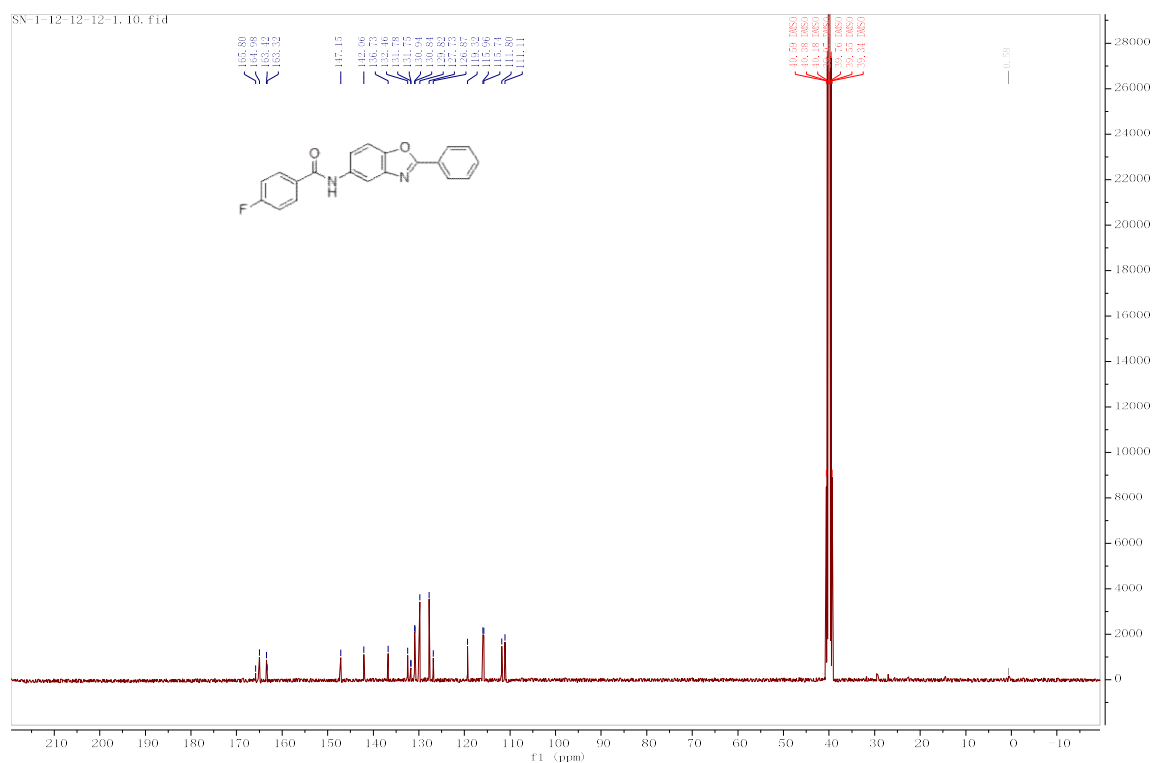

<sup>1</sup>H NMR spectrum (400 MHz, CDCl<sub>3</sub>) of 1-(4-fluorophenyl)-2-((benzoylamino)oxy)benzoxazole. The spectrum shows peaks in the aromatic region (6.8-8.3 ppm) and aliphatic region (1.0-2.3 ppm). Integration values are provided for several peaks.

Chemical structure: O=C(Nc1ccc2c(c1)oc(c2)c3ccc(F)cc3)c4ccccc4

Peak list (ppm): 8.29, 8.27, 8.25, 8.24, 8.21, 8.19, 8.17, 8.14, 8.11, 8.09, 8.08, 8.06, 8.04, 8.03, 8.01, 7.99, 7.97, 7.95, 7.93, 7.91, 7.89, 7.87, 7.85, 7.83, 7.81, 7.79, 7.77, 7.75, 7.73, 7.71, 7.69, 7.67, 7.65, 7.63, 7.61, 7.59, 7.57, 7.55, 7.53, 7.51, 7.49, 7.47, 7.45, 7.43, 7.41, 7.39, 7.37, 7.35, 7.33, 7.31, 7.29, 7.27, 7.25, 7.23, 7.21, 7.19, 7.17, 7.15, 7.13, 7.11, 7.09, 7.07, 7.05, 7.03, 7.01, 6.99, 6.97, 6.95, 6.93, 6.91, 6.89, 6.87, 6.85, 6.83, 6.81, 6.79, 6.77, 6.75, 6.73, 6.71, 6.69, 6.67, 6.65, 6.63, 6.61, 6.59, 6.57, 6.55, 6.53, 6.51, 6.49, 6.47, 6.45, 6.43, 6.41, 6.39, 6.37, 6.35, 6.33, 6.31, 6.29, 6.27, 6.25, 6.23, 6.21, 6.19, 6.17, 6.15, 6.13, 6.11, 6.09, 6.07, 6.05, 6.03, 6.01, 5.99, 5.97, 5.95, 5.93, 5.91, 5.89, 5.87, 5.85, 5.83, 5.81, 5.79, 5.77, 5.75, 5.73, 5.71, 5.69, 5.67, 5.65, 5.63, 5.61, 5.59, 5.57, 5.55, 5.53, 5.51, 5.49, 5.47, 5.45, 5.43, 5.41, 5.39, 5.37, 5.35, 5.33, 5.31, 5.29, 5.27, 5.25, 5.23, 5.21, 5.19, 5.17, 5.15, 5.13, 5.11, 5.09, 5.07, 5.05, 5.03, 5.01, 5.99, 5.97, 5.95, 5.93, 5.91, 5.89, 5.87, 5.85, 5.83, 5.81, 5.79, 5.77, 5.75, 5.73, 5.71, 5.69, 5.67, 5.65, 5.63, 5.61, 5.59, 5.57, 5.55, 5.53, 5.51, 5.49, 5.47, 5.45, 5.43, 5.41, 5.39, 5.37, 5.35, 5.33, 5.31, 5.29, 5.27, 5.25, 5.23, 5.21, 5.19, 5.17, 5.15, 5.13, 5.11, 5.09, 5.07, 5.05, 5.03, 5.01, 5.99, 5.97, 5.95, 5.93, 5.91, 5.89, 5.87, 5.85, 5.83, 5.81, 5.79, 5.77, 5.75, 5.73, 5.71, 5.69, 5.67, 5.65, 5.63, 5.61, 5.59, 5.57, 5.55, 5.53, 5.51, 5.49, 5.47, 5.45, 5.43, 5.41, 5.39, 5.37, 5.35, 5.33, 5.31, 5.29, 5.27, 5.25, 5.23, 5.21, 5.19, 5.17, 5.15, 5.13, 5.11, 5.09, 5.07, 5.05, 5.03, 5.01, 5.99, 5.97, 5.95, 5.93, 5.91, 5.89, 5.87, 5.85, 5.83, 5.81, 5.79, 5.77, 5.75, 5.73, 5.71, 5.69, 5.67, 5.65, 5.63, 5.61, 5.59, 5.57, 5.55, 5.53, 5.51, 5.49, 5.47, 5.45, 5.43, 5.41, 5.39, 5.37, 5.35, 5.33, 5.31, 5.29, 5.27, 5.25, 5.23, 5.21, 5.19, 5.17, 5.15, 5.13, 5.11, 5.09, 5.07, 5.05, 5.03, 5.01, 5.99, 5.97, 5.95, 5.93, 5.91, 5.89, 5.87, 5.85, 5.83, 5.81, 5.79, 5.77, 5.75, 5.73, 5.71, 5.69, 5.67, 5.65, 5.63, 5.61, 5.59, 5.57, 5.55, 5.53, 5.51, 5.49, 5.47, 5.45, 5.43, 5.41, 5.39, 5.37, 5.35, 5.33, 5.31, 5.29, 5.27, 5.25, 5.23, 5.21, 5.19, 5.17, 5.15, 5.13, 5.11, 5.09, 5.07, 5.05, 5.03, 5.01, 5.99, 5.97, 5.95, 5.93, 5.91, 5.89, 5.87, 5.85, 5.83, 5.81, 5.79, 5.77, 5.75, 5.73, 5.71, 5.69, 5.67, 5.65, 5.63, 5.61, 5.59, 5.57, 5.55, 5.53, 5.51, 5.49, 5.47, 5.45, 5.43, 5.41, 5.39, 5.37, 5.35, 5.33, 5.31, 5.29, 5.27, 5.25, 5.23, 5.21, 5.19, 5.17, 5.15, 5.13, 5.11, 5.09, 5.07, 5.05, 5.03, 5.01, 5.99, 5.97, 5.95, 5.93, 5.91, 5.89, 5.87, 5.85, 5.83, 5.81, 5.79, 5.77, 5.75, 5.73, 5.71, 5.69, 5.67, 5.65, 5.63, 5.61, 5.59, 5.57, 5.55, 5.53, 5.51, 5.49, 5.47, 5.45, 5.43, 5.41, 5.39, 5.37, 5.35, 5.33, 5.31, 5.29, 5.27, 5.25, 5.23, 5.21, 5.19, 5.17, 5.15, 5.13, 5.11, 5.09, 5.07, 5.05, 5.03, 5.01, 5.99, 5.97, 5.95, 5.93, 5.91, 5.89, 5.87, 5.85, 5.83, 5.81, 5.79, 5.77, 5.75, 5.73, 5.71, 5.69, 5.67, 5.65, 5.63, 5.61, 5.59, 5.57, 5.55, 5.53, 5.51, 5.49, 5.47, 5.45, 5.43, 5.41, 5.39, 5.37, 5.35, 5.33, 5.31, 5.29, 5.27, 5.25, 5.23, 5.21, 5.19, 5.17, 5.15, 5.13, 5.11, 5.09, 5.07, 5.05, 5.03, 5.01, 5.99, 5.97, 5.95, 5.93, 5.91, 5.89, 5.87, 5.85, 5.83, 5.81, 5.79, 5.77, 5.75, 5.73, 5.71, 5.69, 5.67, 5.65, 5.63, 5.61, 5.59, 5.57, 5.55, 5.53, 5.51, 5.49, 5.47, 5.45, 5.43, 5.41, 5.39, 5.37, 5.35, 5.33, 5.31, 5.29, 5.27, 5.25, 5.23, 5.21, 5.19, 5.17, 5.15, 5.13, 5.11, 5.09, 5.07, 5.05, 5.03, 5.01, 5.99, 5.97, 5.95, 5.93, 5.91, 5.89, 5.87, 5.85, 5.83, 5.81, 5.79, 5.77, 5.75, 5.73, 5.71, 5.69, 5.67, 5.65, 5.63, 5.61, 5.59, 5.57, 5.55, 5.53, 5.51, 5.49, 5.47, 5.45, 5.43, 5.41, 5.39, 5.37, 5.35, 5.33, 5.31, 5.29, 5.27, 5.25, 5.23, 5.21, 5.19, 5.17, 5.15, 5.13, 5.11, 5.09, 5.07, 5.05, 5.03, 5.01, 5.99, 5.97, 5.95, 5.93, 5.91, 5.89, 5.87, 5.85, 5.83, 5.81, 5.79, 5.77, 5.75, 5.73, 5.71, 5.69, 5.67, 5.65, 5.63, 5.61, 5.59, 5.57, 5.55, 5.53, 5.51, 5.49, 5.47, 5.45, 5.43, 5.41, 5.3

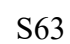

**$^1\text{H}$  and  $^{13}\text{C}$  NMR Spectra of  
*N*-(4-Chloro-3-(trifluoromethyl)phenyl)-4-fluorobenzamide (4d)**

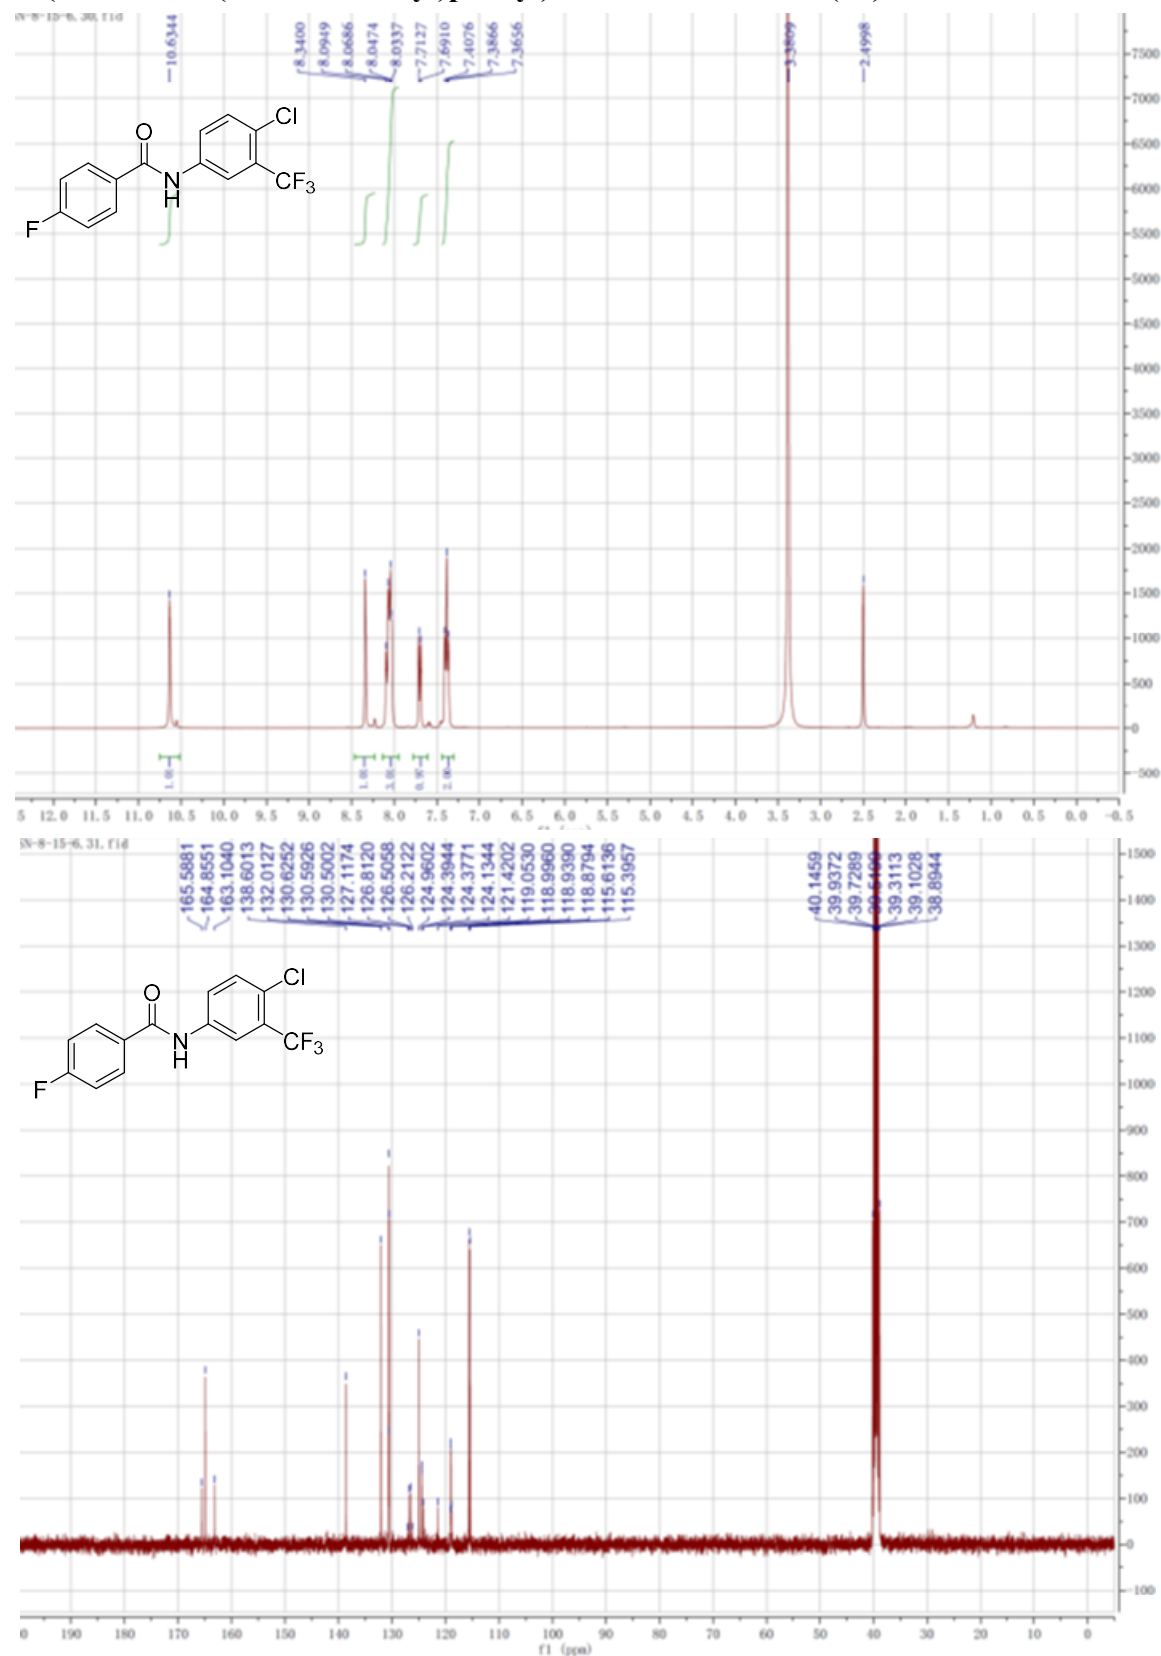

Supplement: c9cc06638a1.pdf [file c9cc06638a1.pdf]
